# Supplementary material
Source: publisher figshare collection journal article supplement (https://gsajournals.figshare.com/ndownloader/files/22406097)
Supplement: Supplementary file 1 [file 22406097]

## Sheet: Sheet1
Accession ID	Best Array	Sample Name	Het Rate	Sample Status*	Failure Mode	Taxon	Plant name	Origin	Group	Ploidy	Genotyping Panel	Notes/pedigree
PI 541234	a550809-4327011-061018-987_A01	CPYR_397.002	--	Fail	QC CR	Pyrus communis	Monchallard	France-Dordogue	Communis	2x	Screening
-	a550809-4327011-061018-987_A02	DH(DoubleHaploid)	0.284	Pass		Pyrus communis	DH sequenced	France	Communis	2x	Screening
PI 260159	a550809-4327011-061018-987_A03	CPYR_359.001	22.043	Pass		Pyrus communis	Louis Pasteur	France	Communis	2x	Screening
PI 324125	a550809-4327011-061018-987_A04	CPYR_40.004	19.348	Pass		Pyrus communis	Bella di Giugno (=Mirandino Rosso)	Italy	Communis	2x	Screening
PI 228012	a550809-4327011-061018-987_A05	CPYR_178.002	10.157	Pass		Pyrus pyrifolia	Doitsu	Japan	Group 4	2x	Screening
PI 541729	a550809-4327011-061018-987_A06	CPYR_650.001	--	Fail	QC CR	Pyrus hybrid	P. calleryana x P. fauriei	United States	Hybrids	2x	Screening
PI 104299	a550809-4327011-061018-987_A07	CPYR_1126.001	--	Fail	QC CR	Pyrus communis	Morocco Common Pear	Morocco	Communis	2x	Screening
PI 502171	a550809-4327011-061018-987_A08	CPYR_1631.001	21.722	Pass		Pyrus communis	Clapp Favorite	United States-Massachusetts	Communis	2x	Screening	Flemish Beauty x Bartlett
PI 541087	a550809-4327011-061018-987_A09	CPYR_1707.001	--	Fail	QC CR	Pyrus calleryana	P. calleryana o.p. - Uzbekistan	Uzbekistan	Group 3	2x	Screening
PI 541547	a550809-4327011-061018-987_A10	CPYR_2273.001	28.892	Pass		Pyrus communis	Golden Spice	United States-Minnesota	Communis	2x	Screening
PI 440630	a550809-4327011-061018-987_A11	CPYR_727.001	12.68	Pass		Pyrus communis subsp. caucasica	P. communis ssp. caucasica - Yankulyski	Russian Federation	Communis	2x	Screening	Seedling selection from seedlot collected in Russia
PI 541634	a550809-4327011-061018-987_A12	CPYR_777.001	--	Fail	QC CR	Pyrus fauriei	P. fauriei No. 5	United States	Group 3	2x	Screening
PI 307545	a550809-4327011-061018-987_B01	CPYR_287.001	12.451	Pass		Pyrus ussuriensis	Huagai Li [Hua Kai]	China	Group 4	2x	Screening	very old cultivar from Liaoning (northeast) China
PI 617598	a550809-4327011-061018-987_B02	CPYR_2522.004	22.218	Pass		Pyrus korshinskyi	P. korshinskyi 94011 - Kyrgyzstan	Kyrgyzstan-Jalal Abad	Group 1	2x	Screening	Open pollinated seed from single tree growing in a group of P. communis and P. korshinskyi. Thus maybe hybrid or pure.
PI 617594	a550809-4327011-061018-987_B03	CPYR_2518.001	22.41	Pass		Pyrus communis	Potomac	United States-Maryland	Communis	2x	Screening	Moonglow x Beurre d'Anjou
PI 541144	a550809-4327011-061018-987_B04	CPYR_77.002	22.817	Pass		Pyrus communis	Beurré Giffard	France	Communis	2x	Screening
PI 502179	a550809-4327011-061018-987_B05	CPYR_1639.001	18.837	Pass		Pyrus hybrid	Sbkta (P. elaeagrifolia)	Hungary	Hybrids	2x	Screening	P. communis x P. nivalis hybrid
PI 255609	a550809-4327011-061018-987_B06	CPYR_98.003	20.75	Pass		Pyrus communis	Bon Chretien d'Hiver	Europe-Ancient	Communis	2x	Screening
PI 542019	a550809-4327011-061018-987_B07	CPYR_1318.001	5.426	Pass		Pyrus ussuriensis	Harbin (P. ussuriensis)	China-Heilongjiang	Group 4	2x	Screening	Selection of seed-propagated variety from China
PI 542014	a550809-4327011-061018-987_B08	CPYR_1202.001	6.623	Pass		Pyrus ussuriensis	P. ussuriensis No. 2 - Korea	United States	Group 4	2x	Screening	Seedling selection from seedlot collected in Korea
PI 437060	a550809-4327011-061018-987_B09	CPYR_432.001	18.531	Pass		Pyrus communis	Onward	United Kingdom	Communis	2x	Screening	Laxton's Superb x Doyenne du Comice
PI 541951	a550809-4327011-061018-987_B10	CPYR_893.001	10.686	Pass		Pyrus salicifolia	Pendula	United Kingdom	Group 2	2x	Screening	Seedling selection
PI 436538	a550809-4327011-061018-987_B11	CPYR_101.001	28.743	Pass		Pyrus communis	BP-1 (Bien Donne 1)	South Africa	Communis	2x	Screening	Seedling selection from seed collected wild in S. Africa
PI 654934	a550809-4327011-061018-987_B12	CPYR_2694.002	26.136	Pass		Pyrus communis	Tosca	Italy	Communis	2x	Screening
PI 541242	a550809-4327011-061018-987_C01	CPYR_451.002	16.297	Pass		Pyrus communis	Petit Blanquet	France	Communis	2x	Screening
PI 617525	a550809-4327011-061018-987_C02	CPYR_1490.001	13.499	Pass		Pyrus elaeagrifolia	P. elaeagrifolia QBZ glabrous	Turkey	Group 2	2x	Screening	Seedling selection from seed collected in Turkey
PI 318871	a550809-4327011-061018-987_C03	CPYR_295.001	--	Fail	QC CR	Pyrus dimorphophylla	P. dimorphophylla - Inunashi - Japan	Japan	Group 3	2x	Screening
PI 541299	a550809-4327011-061018-987_C04	CPYR_1167.001	27.663	Pass		Pyrus communis	Magness	United States-Maryland	Communis	2x	Screening	Seckel seedling x Comice
PI 506363	a550809-4327011-061018-987_C05	CPYR_1666.001	10.987	Pass		Pyrus ussuriensis	Sotoorihime	Japan	Group 4	2x	Screening	Developed from native P. hondoensis
-	a550809-4327011-061018-987_C06	HARROWSWEET	22.41	Pass		Pyrus communis	Harrow Sweet	Canada-Ontario	Communis	2x	Screening
PI 540973	a550809-4327011-061018-987_C07	CPYR_1263.001	6.446	Pass		Pyrus betulifolia	P. betulifolia OSU-3	United States	Group 3	2x	Screening	Seedling selection from seed collected in China
PI 246419	a550809-4327011-061018-987_C08	CPYR_420.001	20.188	Pass		Pyrus communis	Nouveau Poiteau	Belgium	Communis	2x	Screening
PI 250449	a550809-4327011-061018-987_C09	CPYR_411.001	11.148	Pass		Pyrus pashia	Naspati	Nepal	Group 4	2x	Screening
PI 506386	a550809-4327011-061018-987_C10	CPYR_1675.003	20.079	Pass		Pyrus hybrid	Takisha	Yugoslavia-Serbia	Hybrids	2x	Screening
PI 541592	a550809-4327011-061018-987_C11	CPYR_828.001	10.396	Pass		Pyrus cossonii	P. cossonii - Russia	United States	Group 1	2x	Screening	Seedling selection from seedlot collected in the USSR
PI 541746	a550809-4327011-061018-987_C12	CPYR_898.001	22.079	Pass		Pyrus hybrid	P. serrulata x P. heterophylla	United States	Hybrids	2x	Screening	P. serrulata x P. heterophylla
PI 541834	a550809-4327011-061018-987_D01	CPYR_825.001	11.557	Pass		Pyrus koehnei	P. koehnei	United States	Group 3	2x	Screening	Seedling selection from seedlot collected in Taiwan
PI 322035	a550809-4327011-061018-987_D02	CPYR_344.001	20.715	Pass		Pyrus communis	Le Nain Vert (Genetic Dwarf)	France	Communis	2x	Screening	Seedling selection
PI 541195	a550809-4327011-061018-987_D03	CPYR_246.001	21.041	Pass		Pyrus communis	Gin	United Kingdom-England	Communis	2x	Screening
PI 688108	a550809-4327011-061018-987_D04	CPYR_2672.002	22.697	Pass		Pyrus pashia hybrid	Tan Chi II (little pear) - Pakistan	Pakistan-Azad Kashmir	Hybrids	2x	Screening
PI 541900	a550809-4327011-061018-987_D05	CPYR_888.001	11.388	Pass		Pyrus pyrifolia	P. pyrifolia No. 2	United States	Group 4	2x	Screening	Seedling selection
PI 541559	a550809-4327011-061018-987_D06	CPYR_2292.001	20.949	Pass		Pyrus communis	Bestever	United States	Communis	2x	Screening	Comice x Louis Pasteur
PI 541114	a550809-4327011-061018-987_D07	CPYR_13.003	23.164	Pass		Pyrus communis	Allexandrine Douillard	Belgium	Communis	2x	Screening
PI 502168	a550809-4327011-061018-987_D08	CPYR_1628.001	18.151	Pass		Pyrus communis	Tikvaca	Bosnia	Communis	2x	Screening
PI 541310	a550809-4327011-061018-987_D09	CPYR_249.001	22.031	Pass		Pyrus communis	Glou Morceau	Belgium	Communis	2x	Screening
PI 541809	a550809-4327011-061018-987_D10	CPYR_1660.001	27.612	Pass		Pyrus hybrid	NY 10353	United States-New York	Hybrids	2x	Screening	Russet Flemish Beauty x NY 10257 (Bartlett x Ill. #65)
PI 312149	a550809-4327011-061018-987_D11	CPYR_920.001	10.969	Pass		Pyrus syriaca	P. syriaca - Armenia	Armenia	Group 2	2x	Screening	probably originally collected wild
PI 541200	a550809-4327011-061018-987_D12	CPYR_261.001	21.98	Pass		Pyrus communis	H 6831/1.12 (=HW 605?)	Canada-Ontario	Communis	2x	Screening	Seckel x Bartlett second test selection Seckel x NJ6
PI 665786	a550809-4327011-061018-987_E01	CPYR_2644.002	--	Fail	QC CR	Pyrus pyrifolia	Nepal 5075	Nepal	Group 4	2x	Screening
PI 506377	a550809-4327011-061018-987_E02	CPYR_1689.001	20.947	Pass		Pyrus hybrid	Winioska-Saska	Poland	Hybrids	2x	Screening
PI 617654	a550809-4327011-061018-987_E03	CPYR_2598.002	20.501	Pass		Pyrus communis	Pyrodwarf - rootstock clone (IPR expires 2017)	Germany	Communis	2x	Screening	Old Home x Bonne Louise d' Avranches
PI 540929	a550809-4327011-061018-987_E04	CPYR_634.001	10.321	Pass		Pyrus spinosa	P. spinosa (amygdaliformis) - Turkey	Turkey	Group 2	2x	Screening	Seedling selection from seedlot collected wild in Turkey
PI 617645	a550809-4327011-061018-987_E05	CPYR_2576.001	20.8	Pass		Pyrus communis	Martin Sec	United Kingdom-England	Communis	2x	Screening
PI 617578	a550809-4327011-061018-987_E06	CPYR_2499.001	18.645	Pass		Pyrus communis	Mission La Purisima Pear 17-E	United States	Communis	2x	Screening
PI 506383	a550809-4327011-061018-987_E07	CPYR_1690.003	25.836	Pass		Pyrus communis	Tamiioase de Calinesti	Romania	Communis	2x	Screening
PI 617506	a550809-4327011-061018-987_E08	CPYR_745.001	9.863	Pass		Pyrus cordata	P. cordata (pure) - France	France	Group 1	2x	Screening	Seedling selection from seed collected wild in France
-	a550809-4327011-061018-987_E09	US309	25.838	Pass		Pyrus communis	US 309	United States	Communis	2x	Screening
PI 541191	a550809-4327011-061018-987_E10	CPYR_233.001	20.119	Pass		Pyrus communis	Forelle	Germany	Communis	2x	Screening
PI 541170	a550809-4327011-061018-987_E11	CPYR_168.001	20.168	Pass		Pyrus communis	Dawn	United States-Maryland	Communis	2x	Screening	Michigan 437 (Barseck x Bartlett) x Comice
PI 420808	a550809-4327011-061018-987_E12	CPYR_885.001	10.995	Pass		Pyrus pyrifolia	P. pyrifolia - Thailand	Thailand-Lampang	Group 4	2x	Screening	Collected from the wild in Thailand.
PI 541662	a550809-4327011-061018-987_F01	CPYR_787.001	18.795	Pass		Pyrus gharbiana	P. gharbiana No. 1	United States	Group 1	2x	Screening	Seedling selection from seedlot collected in Morocco
PI 280405	a550809-4327011-061018-987_F02	CPYR_436.001	25.639	Pass		Pyrus communis	Packham's Triumph	Australia-New South Wales	Communis	2x	Screening	Uvedale St. Germain x Bartlett
PI 541253	a550809-4327011-061018-987_F03	CPYR_489.002	21.753	Pass		Pyrus communis	Roi Charles de Wurttemberg	Germany	Communis	2x	Screening
PI 105193	a550809-4327011-061018-987_F04	CPYR_1079.001	22.811	Pass		Pyrus communis	Clara Frijs (Comtesse Clara Frijs)	Denmark	Communis	2x	Screening
PI 313928	a550809-4327011-061018-987_F05	CPYR_678.001	9.76	Pass		Pyrus calleryana f. graciliflora	P. calleryana v. graciliflora	NA	Group 3	2x	Screening
PI 286220	a550809-4327011-061018-987_F06	CPYR_516.002	22.099	Pass		Pyrus communis	Scipiona	United Kingdom	Communis	2x	Screening
PI 312507	a550809-4327011-061018-987_F07	CPYR_556.001	18.23	Pass		Pyrus communis	Summer Blood Birne	Germany	Communis	2x	Screening
PI 295089	a550809-4327011-061018-987_F08	CPYR_181.001	23.303	Pass		Pyrus communis	Doyenne d'Alecon	France	Communis	2x	Screening
PI 541999	a550809-4327011-061018-987_F09	CPYR_453.003	15.282	Pass		Pyrus ×bretschneideri	Ping Ding Li	China	Group 4	2x	Screening	P. ussuriensis x P. phaeocarpa
PI 105136	a550809-4327011-061018-987_F10	CPYR_1065.001	21.529	Pass		Pyrus communis	Bergamote de la Pentecote	Belgium	Communis	2x	Screening
PI 483393	a550809-4327011-061018-987_F11	CPYR_1547.001	18.155	Pass		Pyrus communis	Zelinka	Yugoslavia-Serbia	Communis	2x	Screening
PI 540945	a550809-4327011-061018-987_F12	CPYR_655.001	16.876	Pass		Pyrus betulifolia	OPR-113 P. betulifolia No. 4	United States	Group 3	2x	Screening
PI 483387	a550809-4327011-061018-987_G01	CPYR_1541.001	18.782	Pass		Pyrus communis	Krupen Burnusus	Yugoslavia	Communis	2x	Screening
PI 541855	a550809-4327011-061018-987_G02	CPYR_1622.001	3.965	Pass		Pyrus mamorensis	P. mamorensis - Long Ashton	United Kingdom	Group 1	2x	Screening
PI 352637	a550809-4327011-061018-987_G03	CPYR_554.001	8.314	Pass		Pyrus pyrifolia	Suisei	Japan	Group 4	2x	Screening	Kikusui x Yakumo
PI 131136	a550809-4327011-061018-987_G04	CPYR_1141.002	23.308	Pass		Pyrus communis	Saint Gilles	France	Communis	2x	Screening
PI 541445	a550809-4327011-061018-987_G05	CPYR_1090.001	21.22	Pass		Pyrus communis	Ewart (rec. as 4x - not 4x)	United States	Communis	2x	Screening
PI 637997	a550809-4327011-061018-987_G06	CPYR_2732.001	35.525	Pass		Pyrus hybrid	Le Conte	United States-Georgia	Hybrids	2x	Screening	Chinese Sand Pear x P. communis
PI 352633	a550809-4327011-061018-987_G07	CPYR_318.002	9.421	Pass		Pyrus pyrifolia	Kimizukawase	Japan	Group 4	2x	Screening	Shinkozo x Doitsu
PI 693196	a550809-4327011-061018-987_G08	CPYR_3000.001	16.37	Pass		Pyrus ussuriensis	Ba Li Shian	China	Group 4	2x	Screening	old pear local selection from Liaoning Province
PI 541945	a550809-4327011-061018-987_G09	CPYR_890.001	--	Fail	QC CR	Pyrus regelii	P. regelii	Russian Federation	Group 2	2x	Screening
PI 541388	a550809-4327011-061018-987_G10	CPYR_1168.001	23.148	Pass		Pyrus communis	El Dorado	United States-California	Communis	2x	Screening	Probably seedling of cultivar Bartlett
PI 657923	a550809-4327011-061018-987_G11	CPYR_2882.001	15.819	Pass		Pyrus sachokiana	P. sachokiana GE-2006-115 - Georgia	Georgia-Kakheti	Group 2	2x	Screening	Seed collected at research station in Republic of Georgia.
PI 541560	a550809-4327011-061018-987_G12	CPYR_692.001	10.269	Pass		Pyrus communis subsp. caucasica	P. communis ssp. caucasica Mag 5 - Pyatigorsk, Russia	Russian Federation	Communis	2x	Screening	Seedling selection from seed collected in Russia
PI 688090	a550809-4327011-061018-987_H01	CPYR_2681.002	10.466	Pass		Pyrus ×bretschneideri	Xuehuali (Snowflake)	China	Group 4	2x	Screening
PI 665760	a550809-4327011-061018-987_H02	CPYR_2965.001	13.567	Pass		Pyrus communis subsp. pyraster	P. communis ssp. pyraster ALB-2011-024	Albania	Communis	2x	Screening
PI 437051	a550809-4327011-061018-987_H03	CPYR_306.001	28.819	Pass		Pyrus communis subsp. pyraster	Jubilee	Canada	Communis	2x	Screening
PI 143978	a550809-4327011-061018-987_H04	CPYR_379.001	6.128	Pass		Pyrus ussuriensis	P. ussuriensis - Manchuria	Canada	Group 4	2x	Screening	Possibly a seedling selection from a Chinese seedlot
PI 541506	a550809-4327011-061018-987_H05	CPYR_2332.001	23.4	Pass		Pyrus communis	Tyson	United States	Communis	2x	Screening	Seedling selection
PI 300693	a550809-4327011-061018-987_H06	CPYR_38.001	27.583	Pass		Pyrus communis	Bartlett	United Kingdom-England	Communis	2x	Screening	Chance seedling
PI 276764	a550809-4327011-061018-987_H07	CPYR_115.001	22.352	Pass		Pyrus communis	Butirra Precoce Morettini	Italy	Communis	2x	Screening	Coscia x Williams Bon Chretien
PI 300691	a550809-4327011-061018-987_H08	CPYR_1187.001	19.761	Pass		Pyrus communis	Beurré Hardy	France	Communis	2x	Screening
PI 440629	a550809-4327011-061018-987_H09	CPYR_717.001	9.918	Pass		Pyrus communis subsp. caucasica	P. communis ssp. caucasica - Stavropol	Russian Federation	Communis	2x	Screening	Seedling selection from seedlot collected in Russia
PI 638012	a550809-4327011-061018-987_H10	CPYR_2820.001	9.591	Pass		Pyrus pyrifolia	Choju (=Ichiban Nashi tm)	Japan	Group 4	2x	Screening	Asahi x Kitsukawasei
PI 506365	a550809-4327011-061018-987_H11	CPYR_1575.001	12.51	Pass		Pyrus hondoensis	P. hondoensis 'Iwate Yamanashi'	Japan	Group 4	2x	Screening
PI 449288	a550809-4327011-061018-987_H12	CPYR_162.001	29.176	Pass		Pyrus communis	Vicar of Winkfield	France	Communis	2x	Screening	Chance seedling
PI 541903	a550809-4327012-061118-997_A01	CPYR_1125.004	35.992	Pass		Pyrus hybrid	Monterrey	Mexico-Nuevo Leon	Hybrids	2x	Screening
PI 541163	a550809-4327012-061118-997_A02	CPYR_139.004	18.138	Pass		Pyrus communis	Citron de Carmes (Madeleine)	France	Communis	2x	Screening
PI 688141	a550809-4327012-061118-997_A03	CPYR_2876.001	24.673	Pass		Pyrus communis	Lesnaya Krasavitza	Kazakhstan	Communis	2x	Screening
PI 541896	a550809-4327012-061118-997_A04	CPYR_875.001	7.194	Pass		Pyrus pseudopashia	P. pseudopashia [P. pashia Kansu?]	United States	Group 4	2x	Screening	Seedling selection from seedlot collected wild in China
PI 541230	a550809-4327012-061118-997_A05	CPYR_382.002	25.091	Pass		Pyrus communis	Marie Louise	Belgium	Communis	2x	Screening	Seedling selection
PI 542022	a550809-4327012-061118-997_A06	CPYR_1617.002	16.929	Pass		Pyrus ×bretschneideri	Xiangshui Li [Hsiang Sui-Li]	China	Group 4	2x	Screening	old selection from the wild in Northeast China
-	a550809-4327012-061118-997_A07	Moonglow	23.538	Pass		Pyrus communis	Moonglow	United States-Maryland	Communis	2x	Screening	US-Mich. 437 x Roi Charles Wurtemburg
PI 255616	a550809-4327012-061118-997_A08	CPYR_410.001	20.779	Pass		Pyrus communis	Napoleon	Belgium	Communis	2x	Screening
PI 541859	a550809-4327012-061118-997_A09	CPYR_725.002	18.703	Pass		Pyrus nivalis	P. nivalis P-91 (pure)	United States-Oregon	Group 1	2x	Screening	Seedling selection
PI 483363	a550809-4327012-061118-997_A10	CPYR_75.002	25.343	Pass		Pyrus communis	Beurré Easter	Belgium	Communis	2x	Screening
PI 322285	a550809-4327012-061118-997_A11	CPYR_684.001	16.912	Pass		Pyrus communis subsp. caucasica	P. communis ssp. caucasica - Ukraine	Ukraine	Communis	2x	Screening	Collected from the wild in the Soviet Union
-	a550809-4327012-061118-997_A12	NJA2R59T69	40.052	Pass		(Pyrus ussuriensis x Pyrus pyrifolia) x Pyrus communis	NJA2R59T69	United States	Hybrids	2x	Screening
PI 617678	a550809-4327012-061118-997_B01	CPYR_2623.001	12.069	Pass		Pyrus pyrifolia	Dan Bae (Olympic)	NA	Group 4	2x	Screening
PI 617559	a550809-4327012-061118-997_B02	CPYR_2382.001	14.745	Pass		Pyrus salicifolia	P. salicifolia hybrid - blister mite resistant	United States	Group 2	2x	Screening	Seedling selection from seedlot from USSR
PI 541617	a550809-4327012-061118-997_B03	CPYR_765.001	8.877	Pass		Pyrus elaeagrifolia	P. elaeagrifolia MSU6768	United States	Group 2	2x	Screening	Probably a seedling selection from wild seed
PI 231810	a550809-4327012-061118-997_B04	CPYR_389.002	22.073	Pass		Pyrus communis	Madame du Ballett	France	Communis	2x	Screening
PI 541256	a550809-4327012-061118-997_B05	CPYR_496.001	20.988	Pass		Pyrus communis	Rousselet de Reims	NA	Communis	2x	Screening
PI 97348	a550809-4327012-061118-997_B06	CPYR_1119.001	11.121	Pass		Pyrus pyrifolia	Meigetsu	Japan	Group 4	2x	Screening
PI 541669	a550809-4327012-061118-997_B07	CPYR_1621.001	18.517	Pass		Pyrus gharbiana	P. gharbiana	United Kingdom	Group 1	2x	Screening
PI 688147	a550809-4327012-061118-997_B08	CPYR_2726.001	5.288	Pass		Pyrus ussuriensis	P. ussuriensis HVSC-053 - Khabarovsk, Russia	Russian Federation-Khabarovsk	Group 4	2x	Screening	Collected in the wild in Khabarovsk, Russian Federation.
PI 541456	a550809-4327012-061118-997_B09	CPYR_431.001	22.467	Pass		Pyrus communis	Old Home	United States-Illinois	Communis	2x	Screening	Chance seedling
PI 300693	a550809-4327012-061118-997_B10	CPYR_38.001	27.601	Pass		Pyrus communis	Bartlett	United Kingdom-England	Communis	2x	Screening	Chance seedling
PI 228014	a550809-4327012-061118-997_B11	CPYR_317.003	9.369	Pass		Pyrus pyrifolia	Kikusui	Japan	Group 4	2x	Screening	Taihaku x Nijisseiki
PI 541130	a550809-4327012-061118-997_B12	CPYR_56.002	20.937	Pass		Pyrus communis	Besi d'Hery	France	Communis	2x	Screening
PI 324124	a550809-4327012-061118-997_C01	CPYR_12.002	18.429	Pass		Pyrus communis	Akca	Turkey	Communis	2x	Screening
PI 292656	a550809-4327012-061118-997_C02	CPYR_159.002	22.875	Pass		Pyrus communis	Coscia	Italy	Communis	2x	Screening	Chance seedling
PI 506373	a550809-4327012-061118-997_C03	CPYR_1674.002	20.068	Pass		Pyrus communis subsp. pyraster	P. communis ssp. pyraster - Serbia	Yugoslavia-Serbia	Communis	2x	Screening
PI 541327	a550809-4327012-061118-997_C04	CPYR_1060.001	21.26	Pass		Pyrus communis	Barseck	United States-New York	Communis	2x	Screening	Bartlett x Seckel
PI 134606	a550809-4327012-061118-997_C05	CPYR_573.002	28.665	Pass		Pyrus hybrid	Tioma	Former Soviet Union	Hybrids	2x	Screening
PI 541913	a550809-4327012-061118-997_C06	CPYR_7.001	--	Fail	QC CR	Pyrus pyrifolia	P. pyrifolia K-15 - Korea	Korea-South	Group 4	2x	Screening
PI 541444	a550809-4327012-061118-997_C07	CPYR_1516.002	18.581	Pass		Pyrus communis	Stuttgarter-Geishirtle (= Zuckerbirne)	Germany	Communis	2x	Screening
PI 637990	a550809-4327012-061118-997_C08	CPYR_2595.002	20.578	Pass		Pyrus communis	Endicott Pear	United States-Massachusetts	Communis	2x	Screening
PI 540937	a550809-4327012-061118-997_C09	CPYR_1608.001	9.841	Pass		Pyrus spinosa	P. spinosa (amygdaliformis) - Greece (Epires)	Greece	Group 2	2x	Screening	Seedling selection from seedlot collected in Greece
PI 324035	a550809-4327012-061118-997_C10	CPYR_2043.001	9.849	Pass		Pyrus communis subsp. caucasica	P. communis ssp. caucasica - Caucasus Mts. Russia	Russian Federation	Communis	2x	Screening	Seedling selection from seed collected in Russia
-	a550809-4327012-061118-997_C11	CPYR_2705.001	22.994	Pass		Pyrus communis	QR 708-36 (P. communis rootstock clone)	United Kingdom-England	Communis	2x	Screening	Pyrus communis 'BP-1' x 'Old Home'
PI 641299	a550809-4327012-061118-997_C12	CPYR_2842.001	11.072	Pass		Pyrus communis subsp. caucasica	P. communis ssp. caucasica GE-2004-120 - Georgia, Nikortsminda	Georgia-Racha	Communis	2x	Screening	Collected in the wild in Republic of Georgia.
PI 541021	a550809-4327012-061118-997_D01	CPYR_663.001	8.465	Pass		Pyrus calleryana	P. calleryana	United States	Group 3	2x	Screening	Probably a seedling selection from an Asian seedlot
PI 541807	a550809-4327012-061118-997_D02	CPYR_1658.001	37.732	Pass		Pyrus hybrid	NY 10262	United States-New York	Hybrids	2x	Screening	Seckel x Ill #65 (P. ussuriensis)
PI 617589	a550809-4327012-061118-997_D03	CPYR_2513.004	2.57	Pass		Pyrus regelii	P. regelii KAZ 93-41-09 - Kazakhstan	Kazakhstan	Group 2	2x	Screening
PI 279341	a550809-4327012-061118-997_D04	CPYR_612.001	23.038	Pass		Pyrus communis	Williams Precoce Morettini	Italy	Communis	2x	Screening	Bartlett x Citron des Carmes
-	a550809-4327012-061118-997_D05	HarrowDelight	22.91	Pass		Pyrus communis	Harrow Delight	Canada-Ontario	Communis	2x	Screening	Bartlett x Purdue 80-51 (Early Sweet x Old Home)
PI 483399	a550809-4327012-061118-997_D06	CPYR_1549.002	15.685	Pass		Pyrus communis subsp. pyraster	Mednik	Yugoslavia	Communis	2x	Screening
PI 541066	a550809-4327012-061118-997_D07	CPYR_1314.002	7.808	Pass		Pyrus calleryana	OPR-125 P. calleryana	United States	Group 3	2x	Screening	Seedling selection
-	a550809-4327012-061118-997_D08	US-Michigan437	25.201	Pass		Pyrus communis	US-Michigan 437	United States	Communis	2x	Screening
PI 506374	a550809-4327012-061118-997_D09	CPYR_1688.002	22.542	Pass		Pyrus hybrid	Petrovka	Yugoslavia	Hybrids	2x	Screening
PI 541007	a550809-4327012-061118-997_D10	CPYR_2291.006	4.847	Pass		Pyrus betulifolia	P. betulifolia - Shaanxi, China	China-Shaanxi	Group 3	2x	Screening	Collected from the wild in China
PI 483372	a550809-4327012-061118-997_D11	CPYR_1526.002	19.917	Pass		Pyrus hybrid	Ilinka	Russian Federation	Hybrids	2x	Screening
-	a550809-4327012-061118-997_D12	US82720-002	22.624	Pass		Pyrus communis	US82720-002	United States	Communis	2x	Screening
PI 541601	a550809-4327012-061118-997_E01	CPYR_1214.001	5.866	Pass		Pyrus dimorphophylla	P. dimorphophylla	United States	Group 3	2x	Screening
PI 260158	a550809-4327012-061118-997_E02	CPYR_343.001	21.397	Pass		Pyrus communis	Le Lectier	France	Communis	2x	Screening	Bartlett x Bergamotte Fortunee
PI 260197	a550809-4327012-061118-997_E03	CPYR_184.002	21.724	Pass		Pyrus communis	Doyenne de Juillet	Belgium	Communis	2x	Screening
PI 654959	a550809-4327012-061118-997_E04	CPYR_2785.001	11.15	Pass		Pyrus ×bretschneideri	Bai Li	China	Group 4	2x	Screening
PI 541557	a550809-4327012-061118-997_E05	CPYR_2286.001	23.573	Pass		Pyrus communis	Coscia (Tardive?)	Italy	Communis	2x	Screening	Chance seedling
PI 541591	a550809-4327012-061118-997_E06	CPYR_1589.001	7.812	Pass		Pyrus cordata	P. cordata - Turkey	United States	Group 1	2x	Screening	Seedling selection B from seedlot collected in Turkey
PI 665744	a550809-4327012-061118-997_E07	CPYR_2932.001	20.853	Pass		Pyrus communis	Sunrise	United States	Communis	2x	Screening
PI 264694	a550809-4327012-061118-997_E08	CPYR_23.002	17.634	Pass		Pyrus communis	Arganche	Macedonia	Communis	2x	Screening
PI 541715	a550809-4327012-061118-997_E09	CPYR_486.004	30.036	Pass		Pyrus hybrid	Richard Peters	United States-Pennsylvania	Hybrids	2x	Screening	Kieffer seedling
PI 352636	a550809-4327012-061118-997_E10	CPYR_529.001	10.022	Pass		Pyrus pyrifolia	Shinsui	Japan	Group 4	2x	Screening	Kikusui x Kimizukawase
PI 271658	a550809-4327012-061118-997_E11	CPYR_148.001	22.454	Pass		Pyrus communis	Doyenne du Comice	France	Communis	2x	Screening	Seedling selection
PI 352635	a550809-4327012-061118-997_E12	CPYR_526.002	11.924	Pass		Pyrus pyrifolia	Shinko	Japan	Group 4	2x	Screening
PI 483373	a550809-4327012-061118-997_F01	CPYR_1527.001	20.628	Pass		Pyrus communis subsp. pyraster	Kalebasa Plocka	Poland	Communis	2x	Screening
PI 541636	a550809-4327012-061118-997_F02	CPYR_2.006	--	Fail	QC CR	Pyrus fauriei	P. fauriei - Korea OP seedling	Korea-South	Group 3	2x	Screening
PI 654913	a550809-4327012-061118-997_F03	CPYR_2436.002	18.063	Pass		Pyrus communis subsp. pyraster	P. communis ssp. pyraster P-019 - Poland	Poland	Communis	2x	Screening
PI 541931	a550809-4327012-061118-997_F04	CPYR_2149.002	8.789	Pass		Pyrus pyrifolia	Hosui	Japan	Group 4	2x	Screening	(Kikusi x Yakumo) x Yakumo
PI 315064	a550809-4327012-061118-997_F05	CPYR_268.001	30.904	Pass		Pyrus ussuriensis	Hang Pa Li	China	Group 4	2x	Screening
PI 541320	a550809-4327012-061118-997_F06	CPYR_280.001	18.778	Pass		Pyrus communis	Honeysweet	United States-Indiana	Communis	2x	Screening	Seckel x US 220 (Vermont Beauty x Roi Charles De Wurtemburg)
PI 665788	a550809-4327012-061118-997_F07	CPYR_2646.003	25.178	Pass		Pyrus ×bretschneideri	Zao Su Li	China	Group 4	2x	Screening
PI 541975	a550809-4327012-061118-997_F08	CPYR_908.001	6.171	Pass		Pyrus syriaca	P. syriaca No. 1 - Israel	Israel	Group 2	2x	Screening	Seedling selection from seed collected wild in Israel
PI 617638	a550809-4327012-061118-997_F09	CPYR_2569.002	20.023	Pass		Pyrus communis	La France	United States	Communis	2x	Screening
-	a550809-4327012-061118-997_F10	NJ487601193	14.37	Pass		(Pyrus ussuriensis x Pyrus pyrifolia) x Pyrus communis	NJ487601193	United States	Hybrids	2x	Screening
PI 541178	a550809-4327012-061118-997_F11	CPYR_192.001	22.84	Pass		Pyrus communis	Docteur Jules Guyot (=Limonera)	France	Communis	2x	Screening	Seedling selection
PI 105548	a550809-4327012-061118-997_F12	CPYR_1069.002	26.352	Pass		Pyrus communis	Beurré Flon	France	Communis	2x	Screening
PI 617653	a550809-4327012-061118-997_G01	CPYR_2594.001	21.976	Pass		Pyrus pyrifolia	Zao Su	China	Group 4	2x	Screening
PI 665763	a550809-4327012-061118-997_G02	CPYR_2968.001	8.6	Pass		Pyrus spinosa	P. spinosa ALB-2011-038	Albania	Group 2	2x	Screening
PI 541551	a550809-4327012-061118-997_G03	CPYR_2280.001	16.85	Pass		Pyrus communis	Poirier Fleurissant Tard	France	Communis	2x	Screening
PI 137080	a550809-4327012-061118-997_G04	CPYR_581.002	21.784	Pass		Pyrus communis	Triomphe de Touraine	Belgium	Communis	2x	Screening	Seedling selection
PI 541689	a550809-4327012-061118-997_G05	CPYR_2117.001	13.88	Pass		Pyrus hondoensis	P. hondoensis - Japan	Japan	Group 4	2x	Screening
PI 224196	a550809-4327012-061118-997_G06	CPYR_413.001	9.625	Pass		Pyrus pyrifolia	Nijisseiki	Japan	Group 4	2x	Screening	Chance seedling
-	a550809-4327012-061118-997_G07	GEM17-14-07	22.563	Pass		Pyrus communis	Gem 17-14-07	United States-West Virginia	Communis	2x	Screening
-	a550809-4327012-061118-997_G08	P0176	19.456	Pass		Pyrus communis	Bergamotte de Hollande	NA	Communis	2x	Screening
PI 541317	a550809-4327012-061118-997_G09	CPYR_474.001	18.882	Pass		Pyrus communis	Red Pear	United Kingdom	Communis	2x	Screening
-	a550809-4327012-061118-997_G10	P0069	25.402	Pass		Pyrus communis	Doyenné d'Hiver	Belgium	Communis	2x	Screening	same as Beurré Easter
PI 541965	a550809-4327012-061118-997_G11	CPYR_2254.002	15.051	Pass		Pyrus ussuriensis	Nan Guo Li [Nangon Li]	China	Group 4	2x	Screening	seedling selection from Liaoning
PI 617669	a550809-4327012-061118-997_G12	CPYR_2614.001	26.153	Pass		Pyrus sp.	Baldwin	United States-Alabama	Hybrids	2x	Screening	Origin unknown
PI 200378	a550809-4327012-061118-997_H01	CPYR_305.005	23.909	Pass		Pyrus communis	Josephine de Malines	Belgium	Communis	2x	Screening	Seedling selection
PI 541993	a550809-4327012-061118-997_H02	CPYR_291.001	11.011	Pass		Pyrus ussuriensis	Hung Li	China	Group 4	2x	Screening	P. ussuriensis x P. phaeocarpa complex hybrid of ussuriensis (x bretschneideri)
PI 279338	a550809-4327012-061118-997_H03	CPYR_459.001	22.563	Pass		Pyrus communis	Precoce de Trevoux	France	Communis	2x	Screening
PI 541354	a550809-4327012-061118-997_H04	CPYR_1151.002	26.567	Pass		Pyrus communis	Surecrop	United States-Arkansas	Communis	2x	Screening	Chance seedling of unknown parentage
PI 264695	a550809-4327012-061118-997_H05	CPYR_143.002	23.586	Pass		Pyrus communis	Coloree de Juillet	France	Communis	2x	Screening
PI 502167	a550809-4327012-061118-997_H06	CPYR_1627.001	18.1	Pass		Pyrus communis	Sarajka	Yugoslavia	Communis	2x	Screening
PI 541146	a550809-4327012-061118-997_H07	CPYR_79.002	23.724	Pass		Pyrus communis	Beurré Gris d'Hiver Nouveau	France	Communis	2x	Screening
-	a550809-4327012-061118-997_H08	NJB9R1T117	30.278	Pass		Pyrus communis x Pyrus ussuriensis	NJB9R1T117	United States	Hybrids	2x	Screening
PI 541828	a550809-4327012-061118-997_H09	CPYR_813.001	11.26	Pass		Pyrus koehnei	P. koehnei	United States	Group 3	2x	Screening	Seedling selection from seedlot collected in California
PI 541285	a550809-4327012-061118-997_H10	CPYR_1164.001	23.039	Pass		Pyrus communis	Winter Nelis	Belgium	Communis	2x	Screening	Seedling selection
PI 617587	a550809-4327012-061118-997_H11	CPYR_2510.002	19.934	Pass		Pyrus communis	Blanquilla (=Spadona)	Spain	Communis	2x	Screening
PI 654949	a550809-4327012-061118-997_H12	CPYR_2765.001	22.63	Pass		Pyrus ×sinkiangensis	Lantai Jululi	China	Group 4	2x	Screening
PI 665783	a550809-4327407-061018-084_A01	CPYR_2640.002	--	Fail	QC CR	Pyrus ×bretschneideri	Ta-Shian-Sui Li	China	Group 4	2x	Screening
-	a550809-4327407-061018-084_A02	BU2/33-Pyro II	21.726	Pass		Pyrus communis	BU 2/33 - Pyro II (P. communis rootstock clone)	Germany	Communis	2x	Screening	Old Home x Bonne Luise d'Avranches
PI 349021	a550809-4327407-061018-084_A03	CPYR_636.001	9.995	Pass		Pyrus spinosa	P. spinosa (amygdaliformis) - Macedonia (pure)	Macedonia	Group 2	2x	Screening	Seedling selection from seedlot collected in Yugoslavia
PI 541502	a550809-4327407-061018-084_A04	CPYR_2106.002	24.672	Pass		Pyrus communis	Louise Bonne d'Avranches (L.B. de Jersey)	France-Normandy	Communis	2x	Screening
PI 541229	a550809-4327407-061018-084_A05	CPYR_381.005	24.163	Pass		Pyrus communis	Marguerite Marillat	France	Communis	2x	Screening
PI 318874	a550809-4327407-061018-084_A06	CPYR_925.001	15.258	Pass		Pyrus hondoensis	P. hondoensis - Aonashi	Japan	Group 4	2x	Screening
PI 617683	a550809-4327407-061018-084_A07	CPYR_2711.001	19.3	Pass		Pyrus communis	Mission San Juan Bautista Pear	United States-California	Communis	2x	Screening	Pyrus communis brought to and planted at Mission San Juan Buatista, California prior to 1836.
PI 541511	a550809-4327407-061018-084_A08	CPYR_2119.002	20.719	Pass		Pyrus communis	Muscat	NA	Communis	2x	Screening
PI 282935	a550809-4327407-061018-084_A09	CPYR_119.001	21.65	Pass		Pyrus communis	Butirra Rosata Morettini	Italy	Communis	2x	Screening	Coscia x Beurre Clairgeau
PI 228013	a550809-4327407-061018-084_A10	CPYR_296.002	9.825	Pass		Pyrus pyrifolia	Ishiiwase	Japan	Group 4	2x	Screening	Nijisseiki x Doitsu
PI 295083	a550809-4327407-061018-084_A11	CPYR_64.003	21.695	Pass		Pyrus communis	Beurré d'Arenberg	France	Communis	2x	Screening
PI 541119	a550809-4327407-061018-084_A12	CPYR_25.001	21.5	Pass		Pyrus communis	Aurora	United States-New York	Communis	2x	Screening	Margherite Marillat x Bartlett
PI 312152	a550809-4327407-061018-084_B01	CPYR_929.001	5.586	Pass		Pyrus ussuriensis	P. ussuriensis - Tajikistan	Tajikistan	Group 4	2x	Screening	Collected from the wild in the Soviet Union
PI 377611	a550809-4327407-061018-084_B02	CPYR_883.001	11.386	Pass		Pyrus communis subsp. pyraster	P. communis ssp. pyraster - Macedonia	Macedonia	Communis	2x	Screening	Seedling selection from seedlot collected in Yugoslavia
PI 224089	a550809-4327407-061018-084_B03	CPYR_622.001	8.729	Pass		Pyrus pyrifolia	Yakumo	Japan	Group 4	2x	Screening	Akaho x Nijisseiki
PI 541142	a550809-4327407-061018-084_B04	CPYR_74.002	24.368	Pass		Pyrus communis	Beurré Dumont	Belgium	Communis	2x	Screening	Chance seedling
PI 279335	a550809-4327407-061018-084_B05	CPYR_215.001	22.392	Pass		Pyrus communis	Belle Lucrative	Belgium	Communis	2x	Screening
PI 617619	a550809-4327407-061018-084_B06	CPYR_2547.001	30.74	Pass		Pyrus ussuriensis	Changpa Li	China	Group 4	2x	Screening
PI 541262	a550809-4327407-061018-084_B07	CPYR_519.001	23.193	Pass		Pyrus communis	Seckel	United States-Pennsylvania	Communis	2x	Screening	Chance seedling
PI 97347	a550809-4327407-061018-084_B08	CPYR_136.004	11.57	Pass		Pyrus pyrifolia	Chojuro	Japan	Group 4	2x	Screening	Chance seedling
PI 657921	a550809-4327407-061018-084_B09	CPYR_2849.001	9.931	Pass		Pyrus salicifolia	P. salicifolia GE-2004-141 - Akhaltsike, Georgia	Georgia-Meskheti	Group 2	2x	Screening	Collected in the wild in Republic of Georgia.
PI 541468	a550809-4327407-061018-084_B10	CPYR_1705.003	20.832	Pass		Pyrus communis	P. communis o.p. - Uzbekistan	Uzbekistan	Communis	2x	Screening	Open-pollinated from botanical collection
PI 617646	a550809-4327407-061018-084_B11	CPYR_2577.001	7.403	Pass		Pyrus calleryana	Bradford (P. calleryana)	China	Group 3	2x	Screening	Seedling selection from seedlot PI 47261
PI 638004	a550809-4327407-061018-084_B12	CPYR_2812.002	10.196	Pass		Pyrus communis subsp. caucasica	P. communis ssp. caucasica - Armenia, Spitaki-1	Armenia-Lori	Communis	2x	Screening	Collected from the wild in Armenia.
PI 127715	a550809-4327407-061018-084_C01	CPYR_1106.001	27.52	Pass		Pyrus hybrid	Krylov	United States	Hybrids	2x	Screening	Saponsky x Lincoln
PI 316552	a550809-4327407-061018-084_C02	CPYR_753.001	20.383	Pass		Pyrus cossonii	P. cossonii - Netherlands	Netherlands	Group 1	2x	Screening
PI 104532	a550809-4327407-061018-084_C03	CPYR_1073.004	23.153	Pass		Pyrus communis	Beurré Capiaumont	Belgium	Communis	2x	Screening	Chance seedling
PI 541632	a550809-4327407-061018-084_C04	CPYR_772.004	--	Fail	QC CR	Pyrus fauriei	P. fauriei	United States	Group 3	2x	Screening
PI 541305	a550809-4327407-061018-084_C05	CPYR_103.001	19.852	Pass		Pyrus communis	Brandy	United Kingdom-England	Communis	2x	Screening	Parentage unknown
PI 260153	a550809-4327407-061018-084_C06	CPYR_53.001	22.341	Pass		Pyrus communis	Bergamotte Esperen	Belgium	Communis	2x	Screening	Chance seedling
-	a550809-4327407-061018-084_C07	DH(DoubleHaploid)	0.293	Pass		Pyrus communis	DH sequenced	France	Communis	2x	Screening
PI 264698	a550809-4327407-061018-084_C08	CPYR_557.002	23.351	Pass		Pyrus communis	Summer Muskatel Birne	NA	Communis	2x	Screening
PI 506362	a550809-4327407-061018-084_C09	CPYR_1678.001	11.658	Pass		Pyrus ×bretschneideri	Ya Li	China	Group 4	2x	Screening
PI 541145	a550809-4327407-061018-084_C10	CPYR_78.002	21.691	Pass		Pyrus communis	Beurré Gris	France	Communis	2x	Screening	Unknown - lost in antiquity
PI 541311	a550809-4327407-061018-084_C11	CPYR_281.001	25.151	Pass		Pyrus hybrid	Hood	United States-Florida	Hybrids	2x	Screening	Chance seedling
PI 657915	a550809-4327407-061018-084_C12	CPYR_2624.001	21.445	Pass		Pyrus communis	Elliot	United States-California	Communis	2x	Screening	Elliot No. 4 x Vermont Beauty
PI 260195	a550809-4327407-061018-084_D01	CPYR_10.004	20.551	Pass		Pyrus communis	Abbe Fetel (Abate Fetel)	France	Communis	2x	Screening	Possible Beurré Clairgeau x Louis Bon Jersey
PI 300693	a550809-4327407-061018-084_D02	CPYR_38.001	27.594	Pass		Pyrus communis	Bartlett	United Kingdom-England	Communis	2x	Screening	Chance seedling
PI 541303	a550809-4327407-061018-084_D03	CPYR_17.001	25.751	Pass		Pyrus communis	Duchesse d'Angouleme	France	Communis	2x	Screening	Chance seedling
PI 541914	a550809-4327407-061018-084_D04	CPYR_905.001	19.934	Pass		Pyrus pyrifolia	P. pyrifolia hybrid - Afghanistan	United States	Group 4	2x	Screening	Seedling selection from seed collected in Afghanistan
PI 541705	a550809-4327407-061018-084_D05	CPYR_124.002	35.371	Pass		Pyrus hybrid	Campas No.1	United States-Florida	Hybrids	2x	Screening	P. pyrifolia hybrid
PI 541231	a550809-4327407-061018-084_D06	CPYR_547.001	22.432	Pass		Pyrus communis	Maxine	United States-Ohio	Communis	2x	Screening
PI 506375	a550809-4327407-061018-084_D07	CPYR_1686.001	12.12	Pass		Pyrus pyrifolia	Saprani I (P. pyrifolia)	Yugoslavia	Group 4	2x	Screening
PI 312144	a550809-4327407-061018-084_D08	CPYR_256.002	19.355	Pass		Pyrus nivalis	P. nivalis	Netherlands	Group 1	2x	Screening	Uncertain, possibly collected from the wild
PI 541326	a550809-4327407-061018-084_D09	CPYR_1057.001	17.914	Pass		Pyrus communis	Angelica Di Saonara	Italy	Communis	2x	Screening
PI 617678	a550809-4327407-061018-084_D10	CPYR_2623.001	12.071	Pass		Pyrus pyrifolia	Dan Bae (Olympic)	NA	Group 4	2x	Screening
-	a550809-4327407-061018-084_D11	Illinois76	10.256	Pass		Pyrus ussuriensis x pyrifolia	Illinois 76	United States	Hybrids	2x	Screening
PI 224087	a550809-4327407-061018-084_D12	CPYR_528.001	10.054	Pass		Pyrus pyrifolia	Shinseiki	Japan	Group 4	2x	Screening	Nijiesiki x Chojuro
PI 688091	a550809-4327407-061018-084_E01	CPYR_2723.001	19.936	Pass		Pyrus ×sinkiangensis	Ho Mon	China	Group 4	2x	Screening	Landrace fragrant pear
-	a550809-4327407-061018-084_E02	P1451	23.402	Pass		Pyrus communis	Wilder	NA	Communis	2x	Screening
PI 228015	a550809-4327407-061018-084_E03	CPYR_1181.001	11.463	Pass		Pyrus pyrifolia	Kumoi	Japan	Group 4	2x	Screening	Ishiiwase x Yakumo
PI 541998	a550809-4327407-061018-084_E04	CPYR_439.001	14.65	Pass		Pyrus ussuriensis	Pai Li (Beijing White Pear)	China	Group 4	2x	Screening	old selection from Beijing Region
PI 286384	a550809-4327407-061018-084_E05	CPYR_487.001	21.969	Pass		Pyrus communis	Rocha	Portugal	Communis	2x	Screening
PI 541979	a550809-4327407-061018-084_E06	CPYR_1011.005	--	Fail	QC CR	Pyrus syriaca	P. syriaca - Iran	Iran	Group 2	2x	Screening
PI 541869	a550809-4327407-061018-084_E07	CPYR_1714.002	16.362	Pass		Pyrus nivalis	P. nivalis 1219 - Uzbekistan	Uzbekistan	Group 1	2x	Screening	Open-pollinated from botanical collection
-	a550809-4327407-061018-084_E08	US76128-009	22.367	Pass		Pyrus communis	US76128-009	United States	Communis	2x	Screening
PI 541415	a550809-4327407-061018-084_E09	CPYR_1345.001	24.058	Pass		Pyrus communis	OHxF 87	United States-Oregon	Communis	2x	Screening	Old Home x Bartlett
PI 541714	a550809-4327407-061018-084_E10	CPYR_1166.001	39.367	Pass		Pyrus hybrid	Kieffer	United States-Pennsylvania	Hybrids	2x	Screening	P. pyrifolia x Bartlett
PI 617502	a550809-4327407-061018-084_E11	CPYR_63.001	24.891	Pass		Pyrus communis	Anjou	Belgium	Communis	2x	Screening
PI 641279	a550809-4327407-061018-084_E12	CPYR_2587.001	4.087	Pass		Pyrus regelii	P. regelii - Boraldy River Forest, Kazakhstan	Kazakhstan	Group 2	2x	Screening	Collected from the wild in Kazakhstan.
PI 541168	a550809-4327407-061018-084_F01	CPYR_156.001	22.331	Pass		Pyrus communis	Conference	United Kingdom-England	Communis	2x	Screening	Seedling of cultivar Leon Leclerc de Laval
PI 541008	a550809-4327407-061018-084_F02	CPYR_659.001	12.914	Pass		Pyrus cordata	P. boissieriana (received as)	Turkmenistan	Group 1	2x	Screening	Probably a selection from OP seed from botanical collection
PI 312497	a550809-4327407-061018-084_F03	CPYR_248.003	19.165	Pass		Pyrus communis	Gliva Ukrainskaya / Wilenska Plenna	Poland	Communis	2x	Screening
PI 506388	a550809-4327407-061018-084_F04	CPYR_1664.001	18.129	Pass		Pyrus communis	Poznica	Bosnia	Communis	2x	Screening
PI 541500	a550809-4327407-061018-084_F05	CPYR_2104.001	22.418	Pass		Pyrus communis	Fox	United States-California	Communis	2x	Screening	from seed of Belle Lucrative
PI 506372	a550809-4327407-061018-084_F06	CPYR_1687.002	23.242	Pass		Pyrus communis	Roosevelt	France	Communis	2x	Screening
PI 541670	a550809-4327407-061018-084_F07	CPYR_1205.001	11.264	Pass		Pyrus glabra	P. glabra	United States	Group 2	2x	Screening	Seedling selection from seedlot collected in Turkey
PI 260162	a550809-4327407-061018-084_F08	CPYR_578.001	17.332	Pass		Pyrus communis	Tonkowietka	Former Soviet Union	Communis	2x	Screening
PI 312509	a550809-4327407-061018-084_F09	CPYR_584.001	9.986	Pass		Pyrus ussuriensis	Tse Li	China-Shantung	Group 4	2x	Screening	local selection from Tse County, Shandong Province complex hybrid of ussuriensis (x bretschneideri)
PI 541196	a550809-4327407-061018-084_F10	CPYR_252.001	22.968	Pass		Pyrus communis	Gorham	United States-New York	Communis	2x	Screening
PI 665759	a550809-4327407-061018-084_F11	CPYR_2964.001	9.57	Pass		Pyrus spinosa	P. spinosa ALB-2011-015	Albania	Group 2	2x	Screening
PI 542023	a550809-4327407-061018-084_F12	CPYR_1177.001	10.008	Pass		Pyrus ×bretschneideri	Tsu Li	China-Shantung	Group 4	2x	Screening
PI 540981	a550809-4327407-061018-084_G01	CPYR_1378.001	6.206	Pass		Pyrus betulifolia	OPR-259 P. betulifolia	United States	Group 3	2x	Screening
PI 541207	a550809-4327407-061018-084_G02	CPYR_279.002	21.505	Pass		Pyrus communis	Highland	United States-New York	Communis	2x	Screening	Bartlett x Comice
PI 277420	a550809-4327407-061018-084_G03	CPYR_170.001	22.996	Pass		Pyrus hybrid	Dessertnaia	Former Soviet Union	Hybrids	2x	Screening
PI 131662	a550809-4327407-061018-084_G04	CPYR_441.001	22.968	Pass		Pyrus communis	Passe Crassane	France	Communis	2x	Screening	Seedling selection of cv Crassane
PI 541387	a550809-4327407-061018-084_G05	CPYR_1165.001	21.753	Pass		Pyrus communis	Bosc - OP-5	Belgium	Communis	2x	Screening	Seedling selection.
PI 541105	a550809-4327407-061018-084_G06	CPYR_2186.001	8.187	Pass		Pyrus calleryana	Chanticleer (P. calleryana)	United States	Group 3	2x	Screening
PI 541616	a550809-4327407-061018-084_G07	CPYR_1278.001	9.938	Pass		Pyrus elaeagrifolia	P. elaeagrifolia 'Turkish Mist'	Turkey	Group 2	2x	Screening	Seedling selection from seed collected in Turkey
PI 260157	a550809-4327407-061018-084_G08	CPYR_241.003	21.792	Pass		Pyrus communis	General Le Clerc	France	Communis	2x	Screening	Unknown, probably Comice seedling
PI 295098	a550809-4327407-061018-084_G09	CPYR_577.001	22.222	Pass		Pyrus communis	Tongre (=Durondeau)	Belgium	Communis	2x	Screening
PI 617686	a550809-4327407-061018-084_G10	CPYR_2714.002	22.373	Pass		Pyrus communis	Hager Grove Pioneer Pear	United States-Oregon	Communis	2x	Screening
PI 313929	a550809-4327407-061018-084_G11	CPYR_680.001	10.037	Pass		Pyrus communis subsp. caucasica	P. communis ssp. caucasica - U.S.S.R.	Russian Federation	Communis	2x	Screening	Collected from the wild in the Soviet Union
PI 541996	a550809-4327407-061018-084_G12	CPYR_378.002	11.478	Pass		Pyrus ussuriensis	Man Yuan Xiang [Man Yuan Hsiang]	China	Group 4	2x	Screening	old local cultivar from northeast China
PI 392317	a550809-4327407-061018-084_H01	CPYR_412.001	10.981	Pass		Pyrus pyrifolia	Niitaka (=Singo)	Japan	Group 4	2x	Screening	Amanogawa x Imamuraaki
PI 617620	a550809-4327407-061018-084_H02	CPYR_2548.001	21.698	Pass		Pyrus communis	Junsko Zlato	Yugoslavia	Communis	2x	Screening	Precoce de Trevoux x Doyenne de Juillet
PI 541150	a550809-4327407-061018-084_H03	CPYR_558.002	22.285	Pass		Pyrus communis	Beurré Superfin	France	Communis	2x	Screening	Chance seedling
PI 541292	a550809-4327407-061018-084_H04	CPYR_710.001	13.369	Pass		Pyrus communis subsp. pyraster	P. communis ssp. pyraster Olez 1 - Turkey	Turkey	Communis	2x	Screening	Seedling selection from seed collected in Turkey
PI 541844	a550809-4327407-061018-084_H05	CPYR_835.001	4.001	Pass		Pyrus mamorensis	P. mamorensis - Morocco	Morocco	Group 1	2x	Screening	Seedling selection from seed collected wild in Morocco
PI 617556	a550809-4327407-061018-084_H06	CPYR_2373.001	20.867	Pass		Pyrus communis	Gaspard (=Summercrisp)	United States	Communis	2x	Screening
PI 131889	a550809-4327407-061018-084_H07	CPYR_1153.001	22.596	Pass		Pyrus communis	Tarquin Des Pyrenees	France	Communis	2x	Screening
PI 617608	a550809-4327407-061018-084_H08	CPYR_2534.001	21.367	Pass		Pyrus communis	IV 12	Yugoslavia	Communis	2x	Screening
PI 541188	a550809-4327407-061018-084_H09	CPYR_221.001	18.786	Pass		Pyrus communis	Farmingdale	United States-Illinois	Communis	2x	Screening	Seedling selection, possibly seedling of Anjou
PI 541171	a550809-4327407-061018-084_H10	CPYR_169.002	22.38	Pass		Pyrus communis	Delices d'Avril	France	Communis	2x	Screening
PI 541717	a550809-4327407-061018-084_H11	CPYR_589.002	18.461	Pass		Pyrus pashia	Variolosa (P. pashia hyb.)	NA	Group 4	2x	Screening
PI 541281	a550809-4327407-061018-084_H12	CPYR_602.004	27.567	Pass		Pyrus communis	White Doyenne	France	Communis	2x	Screening	Origin uncertain. May be the 'Sementinum' pear of Greece.
PI 403914	a550887-4349125-010319-487_A01	CPYR_608.001	30.541	Pass		Pyrus communis	Bartlett - Low Chill from S. Africa	South Africa	Communis	2x	1
PI 541568	a550887-4349125-010319-487_A02	CPYR_1289.003	17.7655	Pass		Pyrus communis subsp. pyraster	P. communis ssp. pyraster	Hungary	Communis	2x	1	Seedling selection from seedlot collected wild in Hungary
PI 541641	a550887-4349125-010319-487_A03	CPYR_1213.001		Fail	QC CR	Pyrus fauriei	P. fauriei	Korea-South	Group 3	2x	1
PI 617554	a550887-4349125-010319-487_A04	CPYR_2371.001	26.85	Pass		Pyrus communis	Bantam	United States-Minnesota	Communis	2x	1	Unknown partneage - seedling selection
PI 540969	a550887-4349125-010319-487_A05	CPYR_1255.001	6.5412	Pass		Pyrus betulifolia	P. betulifolia OSU-3	United States	Group 3	2x	1
PI 617544	a550887-4349125-010319-487_A06	CPYR_2352.001	24.793	Pass		Pyrus communis	Doina	Romania	Communis	2x	1
PI 300693	a550887-4349125-010319-487_A07	CPYR_38.001_04	30.5298	Pass		Pyrus communis	Bartlett	United Kingdom	Communis	2x	1
PI 617550	a550887-4349125-010319-487_A08	CPYR_2364.001	34.8934	Pass		Pyrus hybrid	Miller Seedling (Flower Mountain Pear)	United States	Hybrids	2x	1
PI 541236	a550887-4349125-010319-487_A09	CPYR_423.001	30.5312	Pass		Pyrus communis	Bartlett - Nye Russet	United States-Oregon	Communis	2x	1	Bartlett bud mutation
PI 541480	a550887-4349125-010319-487_A10	CPYR_2296.001	23.8821	Pass		Pyrus communis	Manning-Miller	United States-New York	Communis	2x	1	Unknown. Seed prob. sent from Massachusetts by R. Manning.
PI 312495	a550887-4349125-010319-487_A11	CPYR_130.003	22.237	Pass		Pyrus communis	Cebulka	Poland	Communis	2x	1
PI 300693	a550887-4349125-010319-487_A12	CPYR_38.001_05	30.5312	Pass		Pyrus communis	Bartlett	United Kingdom	Communis	2x	1
PI 541313	a550887-4349125-010319-487_A13	CPYR_331.001	27.0462	Pass		Pyrus communis	Lacock No. 6	United States-Montana	Communis	2x	1
PI 638009	a550887-4349125-010319-487_A14	CPYR_2817.001	16.8449	Pass		Pyrus elaeagrifolia	P. elaeagrifolia - Armenia 38	Armenia	Group 2	2x	1	Collected from the wild in Armenia.
PI 541909	a550887-4349125-010319-487_A16	CPYR_1186.001	33.9854	Pass		Pyrus ussuriensis	Chin Li	China	Group 4	2x	1
PI 617610	a550887-4349125-010319-487_A17	CPYR_2536.001	23.8009	Pass		Pyrus communis	Orlovskaja Zolotistaja	Russian Federation	Communis	2x	1
PI 280035	a550887-4349125-010319-487_A18	CPYR_440.002	23.6579	Pass		Pyrus communis	Parrot	United Kingdom	Communis	2x	1
PI 541316	a550887-4349125-010319-487_A19	CPYR_435.001	26.0177	Pass		Pyrus communis	Packham Late	Australia	Communis	2x	1
PI 541860	a550887-4349125-010319-487_A20	CPYR_862.001	24.9387	Pass		Pyrus nivalis	P. nivalis No. 2	United States	Group 1	2x	1	Probably a seedling selection
PI 318869	a550887-4349125-010319-487_A21	CPYR_402.001	24.9037	Pass		Pyrus communis	Morettini 113	Italy	Communis	2x	1	Williams x Citron des Carmes
PI 541966	a550887-4349125-010319-487_A22	CPYR_2255.001	13.0264	Pass		Pyrus pyrifolia	Huhoot Li	China	Group 4	2x	1
PI 541397	a550887-4349125-010319-487_A23	CPYR_1320.001	24.8854	Pass		Pyrus communis	OHxF 18	United States-Oregon	Communis	2x	1	Old Home x Bartlett
PI 541563	a550887-4349125-010319-487_A24	CPYR_681.001	14.0339	Pass		Pyrus communis subsp. caucasica	P. communis ssp. caucasica No.6	Russian Federation	Communis	2x	1
Q 39612	a550887-4349125-010319-487_B02	CPYR_2751.001	30.4612	Pass		Pyrus communis	India NIC 20822	India	Communis	2x	1
PI 232872	a550887-4349125-010319-487_B04	CPYR_50.002	21.9399	Pass		Pyrus communis	Bere-obtjabra (oktjabra?)	Former Soviet Union	Communis	2x	1
PI 641274	a550887-4349125-010319-487_B06	CPYR_2350.002	24.3137	Pass		Pyrus salicifolia	P. salicifolia (hybrid) - Maikop, Russia	Former Soviet Union	Group 2	2x	1	Uncertain, selection from the wild?
PI 665770	a550887-4349125-010319-487_B08	CPYR_2975.003	36.2681	Pass		Pyrus spinosa	P. spinosa ALB-2011-089a	Albania	Group 2	2x	1
PI 665742	a550887-4349125-010319-487_B10	CPYR_2926.001	24.7397	Pass		Pyrus communis	Riehl Best	United States-Illinois	Communis	2x	1	Discovered by Edwin H. Riehl, Godfrey, Illinois. Introduced by Stark Brothers, Louisiana, Missouri in 1912.
PI 688156	a550887-4349125-010319-487_B12	CPYR_3004.001	8.51842	Pass		Pyrus pyrifolia	Tama	Japan	Group 4	2x	1
PI 506385	a550887-4349125-010319-487_B14	CPYR_1663.001	23.11	Pass		Pyrus hybrid	Para de Zahar de Bihor	Romania	Hybrids	2x	1
PI 617555	a550887-4349125-010319-487_B20	CPYR_2372.001	30.5368	Pass		Pyrus communis	Bileu	NA	Communis	2x	1
PI 693197	a550887-4349125-010319-487_B24	CPYR_2691.002	23.4001	Pass		Pyrus communis	Mela di Laconi	Italy	Communis	2x	1
PI 665808	a550887-4349125-010319-487_C01	CPYR_2858.001	25.7374	Pass		Pyrus communis	Pamyati Yakoleva	Russian Federation	Communis	2x	1
PI 541323	a550887-4349125-010319-487_C02	CPYR_712.001	17.3381	Pass		Pyrus communis subsp. pyraster	P. communis ssp. pyraster - Turkey	United States	Communis	2x	1	Seedling selection from seed collected in Turkey
PI 541745	a550887-4349125-010319-487_C03	CPYR_866.001	27.4582	Pass		Pyrus nivalis	P. nivalis (hybrid) - Yugoslavia - compact habit	United States	Group 1	2x	1	Seedling selection from seedlot collected in Yugoslavia
PI 665785	a550887-4349125-010319-487_C04	CPYR_2448.001	14.4291	Pass		Pyrus pashia	P. pashia - Nepal	Nepal	Group 4	2x	1
PI 449286	a550887-4349125-010319-487_C05	CPYR_122.004	26.4437	Pass		Pyrus communis subsp. pyraster	Nagy Szegfukorte	Hungary	Communis	2x	1
PI 290783	a550887-4349125-010319-487_C06	CPYR_210.003	27.5857	Pass		Pyrus communis	Epine de Mai	France	Communis	2x	1
PI 541237	a550887-4349125-010319-487_C08	CPYR_425.001	35.8533	Pass		Pyrus communis	OH 20 fire blight resistant rootstock	United States-Oregon	Communis	2x	1	Old Home seedling selection, probably hybrid w/pyrifolia
PI 617640	a550887-4349125-010319-487_C09	CPYR_2571.001	24.3333	Pass		Pyrus communis	Soldat Laboureur	United States	Communis	2x	1
PI 540987	a550887-4349125-010319-487_C10	CPYR_1384.001	6.52159	Pass		Pyrus betulifolia	OPR-265 P. betulifolia	United States-Oregon	Group 3	2x	1	P. betulifolia No. 3 seedling selection
PI 541396	a550887-4349125-010319-487_C11	CPYR_1319.001	25.6505	Pass		Pyrus communis	OHxF 257	United States-Oregon	Communis	2x	1	Old Home x Bartlett
PI 617555	a550887-4349125-010319-487_C12	CPYR_2372.002	30.5046	Pass		Pyrus communis	Bileu	NA	Communis	2x	1
PI 541172	a550887-4349125-010319-487_C13	CPYR_173.001	25.4193	Pass		Pyrus communis	Devoe	United States-New York	Communis	2x	1	Probably a seedling of cultivar Clapp Favorite
PI 617674	a550887-4349125-010319-487_C14	CPYR_2619.001	38.9011	Pass		Pyrus hybrid	Ooharabeni	Japan	Hybrids	2x	1	Originally thought to be hybrid of Okusankichi and Max Red Bartlett.
PI 541054	a550887-4349125-010319-487_C16	CPYR_1265.003	7.60478	Pass		Pyrus calleryana	P. calleryana OSU-3	United States	Group 3	2x	1	Seedling selection from seed collected in China
PI 541208	a550887-4349125-010319-487_C17	CPYR_284.001	29.8446	Pass		Pyrus communis	Hoskins	United States-Tennessee	Communis	2x	1	Seckel x Late Faulkner
PI 541905	a550887-4349125-010319-487_C18	CPYR_1174.002	17.816	Pass		Pyrus pyrifolia	Szumi	NA	Group 4	2x	1
PI 665810	a550887-4349125-010319-487_C19	CPYR_2862.001	21.7592	Pass		Pyrus communis	Jarve Seemik	Estonia	Communis	2x	1
PI 688197	a550887-4349125-010319-487_C20	CPYR_2991.001	30.5228	Pass		Pyrus communis	John Day Fossil Beds Pear No. 3	United States-Oregon	Communis	2x	1
PI 665790	a550887-4349125-010319-487_C21	CPYR_2861.001	24.849	Pass		Pyrus hybrid	Serbia Hybrid IV/2	Yugoslavia	Hybrids	2x	1
PI 541284	a550887-4349125-010319-487_C22	CPYR_616.004	26.0457	Pass		Pyrus communis	Winter Bartlett	United States-Oregon	Communis	2x	1	Seedling of cultivar Bartlett
PI 541433	a550887-4349125-010319-487_C23	CPYR_1418.001	25.8327	Pass		Pyrus communis	Unknown P. communis selection - Comice like	United States	Communis	2x	1	Seedling selection
PI 541414	a550887-4349125-010319-487_C24	CPYR_1344.001	25.2904	Pass		Pyrus communis	OHxF 512	United States-Oregon	Communis	2x	1	Old Home x Bartlett
PI 665783	a550887-4349125-010319-487_D02	CPYR_2640.002	17.5918	Pass		Pyrus ×bretschneideri	Ta-Shian-Sui Li	China	Group 4	2x	1
PI 657925	a550887-4349125-010319-487_D04	CPYR_2884.001	22.5817	Pass		Pyrus communis subsp. caucasica	P. (salicifolia hyb.) communis ssp. caucasica GE-2006-128 - Kakhe	Georgia	Communis	2x	1	Collected from the wild in the Republic of Georgia.
PI 688164	a550887-4349125-010319-487_D06	CPYR_2898.001	28.0369	Pass		Pyrus communis	Hand Village Pear AM-2006-225	Armenia	Communis	2x	1
PI 541729	a550887-4349125-010319-487_D08	CPYR_650.001		Fail	QC CR	Pyrus hybrid	P. calleryana x P. fauriei	United States	Hybrids	2x	1
PI 665762	a550887-4349125-010319-487_D10	CPYR_2967.004	10.6484	Pass		Pyrus spinosa	P. spinosa ALB-2011-034	Albania	Group 2	2x	1
CPYR 3016	a550887-4349125-010319-487_D12	CPYR_3016.001	23.1829	Pass		Pyrus communis	Flattened Pear	United States-Oregon	Communis	2x	1
PI 541169	a550887-4349125-010319-487_D14	CPYR_165.001	24.0783	Pass		Pyrus communis	Dana Hovey	United States-Massachusetts	Communis	2x	1	probably a seedling of Seckel possibly a hybrid of Seckel x Winter Nelis
PI 688120	a550887-4349125-010319-487_D16	CPYR_2961.003	13.9975	Pass		Pyrus spinosa	P. spinosa ALB-2011-001	Albania	Group 2	2x	1
PI 228015	a550887-4349125-010319-487_D18	CPYR_329.001	9.92951	Pass		Pyrus pyrifolia	Kumoi [Kumoe]	Japan	Group 4	2x	1	Ishiiwase x Yakumo
PI 665764	a550887-4349125-010319-487_D20	CPYR_2969.002	11.3336	Pass		Pyrus spinosa	P. spinosa ALB-2011-043	Albania	Group 2	2x	1
PI 665767	a550887-4349125-010319-487_D22	CPYR_2972.007	11.7652	Pass		Pyrus spinosa	P. spinosa ALB-2011-070	Albania	Group 2	2x	1
PI 657920	a550887-4349125-010319-487_D24	CPYR_2846.004	22.6686	Pass		Pyrus communis	Zebra Pear O.P. - Georgia	Georgia	Communis	2x	1	Fruit purchased at market in Gori, Georgia.
PI 541409	a550887-4349125-010319-487_E01	CPYR_1337.001	24.8686	Pass		Pyrus communis	OHxF 4	United States-Oregon	Communis	2x	1
PI 483401	a550887-4349125-010319-487_E02	CPYR_1551.002	23.5234	Pass		Pyrus communis subsp. pyraster	Crna Poloska	Yugoslavia	Communis	2x	1
PI 541960	a550887-4349125-010319-487_E03	CPYR_1419.004	25.6127	Pass		Pyrus communis	MM-38	United States	Communis	2x	1
PI 665773	a550887-4349125-010319-487_E05	CPYR_2859.001	23.8905	Pass		Pyrus communis	Zutica	Yugoslavia	Communis	2x	1	Collected from the wild in Yugoslavia.
PI 617546	a550887-4349125-010319-487_E06	CPYR_2357.001	23.8919	Pass		Pyrus communis	Republica	Romania	Communis	2x	1
PI 665774	a550887-4349125-010319-487_E07	CPYR_2860.001	20.7236	Pass		Pyrus communis	Ilinjaca	NA	Communis	2x	1
PI 541904	a550887-4349125-010319-487_E08	CPYR_1173.002	12.6312	Pass		Pyrus pyrifolia	Seuri Li	China	Group 4	2x	1
PI 295092	a550887-4349125-010319-487_E09	CPYR_335.001	23.6719	Pass		Pyrus communis	Lajre (3x)	Sweden	Communis	2x	1	Seedling selection
PI 541427	a550887-4349125-010319-487_E10	CPYR_1367.001	23.5346	Pass		Pyrus communis	OHxF 319	United States-Oregon	Communis	2x	1	Old Home x Bartlett
PI 541398	a550887-4349125-010319-487_E11	CPYR_1321.001	24.9219	Pass		Pyrus communis	OHxF 29	United States-Oregon	Communis	2x	1	Old Home x Bartlett
PI 654918	a550887-4349125-010319-487_E12	CPYR_2446.001	25.6337	Pass		Pyrus ussuriensis	Tu Li	China	Group 4	2x	1
PI 541419	a550887-4349125-010319-487_E13	CPYR_1359.001	23.8919	Pass		Pyrus communis	OHxF 198	United States-Oregon	Communis	2x	1	Old Home x Bartlett
PI 617644	a550887-4349125-010319-487_E14	CPYR_2575.001	25.097	Pass		Pyrus communis	Poire d'Anis	United States	Communis	2x	1
PI 352658	a550887-4349125-010319-487_E15	CPYR_492.001	24.8448	Pass		Pyrus communis	Rosu Tamiios de Bristrita	Romania	Communis	2x	1
PI 541425	a550887-4349125-010319-487_E16	CPYR_1365.001	26.5684	Pass		Pyrus communis	OHxF 280	United States-Oregon	Communis	2x	1	Old Home x Bartlett
PI 541649	a550887-4349125-010319-487_E17	CPYR_1398.001		Fail	QC CR	Pyrus fauriei	P. fauriei	Korea-South	Group 3	2x	1
PI 506376	a550887-4349125-010319-487_E18	CPYR_1673.001	18.0444	Pass		Pyrus hybrid	Saprani II	Yugoslavia	Hybrids	2x	1
PI 324130	a550887-4349125-010319-487_E19	CPYR_711.001	22.7162	Pass		Pyrus communis	IP-1100	Italy	Communis	2x	1
PI 541277	a550887-4349125-010319-487_E21	CPYR_592.001	24.0419	Pass		Pyrus communis	Vermont Beauty	United States-Vermont	Communis	2x	1
PI 313939	a550887-4349125-010319-487_E22	CPYR_932.001	16.0868	Pass		Pyrus ×uyematsuana	P. x uyematsuana	Russian Federation	Hybrids	2x	1
PI 541399	a550887-4349125-010319-487_E23	CPYR_1322.001	25.4642	Pass		Pyrus communis	OHxF 7	United States-Oregon	Communis	2x	1	Old Home x Bartlett
PI 693198	a550887-4349125-010319-487_E24	CPYR_2980.001	26.7029	Pass		Pyrus ×sinkiangensis	Keshinugeamut Li	China	Group 4	2x	1
PI 641297	a550887-4349125-010319-487_F02	CPYR_2840.003	13.2982	Pass		Pyrus communis subsp. caucasica	P. communis ssp. caucasica GE-2004-075 - Georgia, Satere	Georgia	Communis	2x	1	Collected in the wild in Republic of Georgia.
PI 300693	a550887-4349125-010319-487_F03	CPYR_38.001_07	30.5214	Pass		Pyrus communis	Bartlett	United Kingdom	Communis	2x	1
PI 641281	a550887-4349125-010319-487_F04	CPYR_2716.001	8.05039	Pass		Pyrus syriaca	P. syriaca - Israel (seedling)	Israel	Group 2	2x	1
PI 541866	a550887-4349125-010319-487_F06	CPYR_970.001	23.1689	Pass		Pyrus nivalis	P. nivalis - United Kingdom	United Kingdom	Group 1	2x	1	Open-pollinated from botanical collection
PI 641294	a550887-4349125-010319-487_F08	CPYR_2837.001	11.3658	Pass		Pyrus communis subsp. caucasica	P. communis ssp. caucasica GE-2004-041 - Georgia, Shatili	Georgia	Communis	2x	1	Collected in the wild in Republic of Georgia.
PI 657918	a550887-4349125-010319-487_F10	CPYR_2798.001	10.0318	Pass		Pyrus salicifolia	P. salicifolia ARM-02-076 - Armenia, Arpa Gorge	Armenia	Group 2	2x	1	Collected from the wild in Armenia.
PI 641298	a550887-4349125-010319-487_F12	CPYR_2841.001	13.7424	Pass		Pyrus communis subsp. caucasica	P. communis ssp. caucasica GE-2004-081 - Georgia, Bakuriani	Georgia	Communis	2x	1	Collected in the wild in Republic of Georgia.
PI 665770	a550887-4349125-010319-487_F14	CPYR_2975.006	11.5788	Pass		Pyrus spinosa	P. spinosa ALB-2011-089b	Albania	Group 2	2x	1
PI 665765	a550887-4349125-010319-487_F16	CPYR_2970.002	10.6932	Pass		Pyrus spinosa	P. spinosa ALB-2011-064	Albania	Group 2	2x	1
PI 665769	a550887-4349125-010319-487_F18	CPYR_2974.001	11.2425	Pass		Pyrus spinosa	P. spinosa ALB-2011-078	Albania	Group 2	2x	1
PI 688179	a550887-4349125-010319-487_F20	CPYR_2977.001	24.4566	Pass		Pyrus communis	Paragon	United States-Oregon	Communis	2x	1
PI 637995	a550887-4349125-010319-487_F22	CPYR_2730.004		Fail	QC CR	Pyrus ussuriensis	P. ussuriensis 'Primorski Sour' - Khabarovsk, Russia	Russian Federation	Group 4	2x	1
PI 665769	a550887-4349125-010319-487_F24	CPYR_2974.002	9.79359	Pass		Pyrus spinosa	P. spinosa ALB-2011-078	Albania	Group 2	2x	1
PI 617607	a550887-4349125-010319-487_G01	CPYR_2532.001	26.2517	Pass		Pyrus communis	Illinois 80E-1 (Illinois selection from Russian seed)	United States-Illinois	Communis	2x	1	Seedling selection - seed from Russia
PI 541322	a550887-4349125-010319-487_G02	CPYR_367.001	27.5535	Pass		Pyrus communis	Luscious	United States-South Dakota	Communis	2x	1	SD-E31 x Ewart
PI 541628	a550887-4349125-010319-487_G03	CPYR_1473.001	11.2481	Pass		Pyrus elaeagrifolia	P. elaeagrifolia Olez 2	Turkey	Group 2	2x	1	Seedling selection B from seed collected in Turkey
PI 641291	a550887-4349125-010319-487_G04	CPYR_2811.001	37.8123	Pass		Pyrus communis	Burford Pear	United States-Virginia	Communis	2x	1	Possibly an old French cultivar
PI 541287	a550887-4349125-010319-487_G05	CPYR_625.001	22.9166	Pass		Pyrus communis	Yellow Huffcap	United Kingdom	Communis	2x	1
PI 541740	a550887-4349125-010319-487_G06	CPYR_785.001		Fail	QC CR	Pyrus hybrid	P. fauriei x P. heterophylla	United States	Hybrids	2x	1
PI 541406	a550887-4349125-010319-487_G07	CPYR_1330.002	24.5688	Pass		Pyrus communis	OHxF 130	United States-Oregon	Communis	2x	1	Old Home x Bartlett
PI 541304	a550887-4349125-010319-487_G09	CPYR_45.001	25.9154	Pass		Pyrus communis	Belle Poitevien	France	Communis	2x	1
PI 541718	a550887-4349125-010319-487_G10	CPYR_648.001	11.4962	Pass		Pyrus hybrid	P. betulifolia hybrid	China	Hybrids	2x	1	Collected from the wild in China
PI 337445	a550887-4349125-010319-487_G11	CPYR_498.001	25.8747	Pass		Pyrus communis	Rousselet of Stuttgart x Dr. Jules Guyot No. V	Russian Federation	Communis	2x	1
PI 617636	a550887-4349125-010319-487_G12	CPYR_2566.002	26.9888	Pass		Pyrus communis	Pertusati	France	Communis	2x	1
PI 337446	a550887-4349125-010319-487_G13	CPYR_499.001	25.9042	Pass		Pyrus communis	Rousselet of Stuttgart x Dr. Jules Guyot No. VII (Vavilov)	Russian Federation	Communis	2x	1
PI 506384	a550887-4349125-010319-487_G14	CPYR_1676.003		Fail	QC CR	Pyrus hybrid	Coadesele IDX (prob. is Ayers)	Romania	Hybrids	2x	1
PI 665798	a550887-4349125-010319-487_G15	CPYR_2865.001	24.6276	Pass		Pyrus communis	Buttidu de Austu	Italy	Communis	2x	1
PI 541056	a550887-4349125-010319-487_G16	CPYR_1267.001	7.97752	Pass		Pyrus calleryana	P. calleryana OSU-6	United States	Group 3	2x	1	Seedling selection from seed collected in China
PI 541956	a550887-4349125-010319-487_G17	CPYR_629.001	34.6384	Pass		Pyrus sp.	Kansu x self	United States	Hybrids	2x	1	Kansu x self
PI 654958	a550887-4349125-010319-487_G18	CPYR_2784.001	16.6753	Pass		Pyrus ussuriensis	Uzhi Li	China	Group 4	2x	1	Recived from Kazakhstan, where they are used as pear rootstocks. Originated in China.
PI 307542	a550887-4349125-010319-487_G19	CPYR_320.002	23.2193	Pass		Pyrus communis	Kiparyjska	Poland	Communis	2x	1
PI 312505	a550887-4349125-010319-487_G20	CPYR_452.002	25.3675	Pass		Pyrus communis	Phileson	Canada-Ontario	Communis	2x	1	Kurskaya x Flemish Beauty
PI 665750	a550887-4349125-010319-487_G21	CPYR_2941.001	33.9574	Pass		Pyrus hybrid	Tennosui	United States-Texas	Hybrids	2x	1
PI 541510	a550887-4349125-010319-487_G22	CPYR_2118.001	25.0732	Pass		Pyrus communis	Fin de Siecle	NA	Communis	2x	1	from seed of Souvenire de Lydie
PI 617545	a550887-4349125-010319-487_G23	CPYR_2354.001	24.9891	Pass		Pyrus communis	Aromata di Bistrita	Romania	Communis	2x	1
PI 541404	a550887-4349125-010319-487_G24	CPYR_1327.001	25.7066	Pass		Pyrus communis	OHxF 132	United States-Oregon	Communis	2x	1	Old Home x Bartlett
PI 641293	a550887-4349125-010319-487_H02	CPYR_2836.001	12.8035	Pass		Pyrus communis subsp. caucasica	P. communis ssp. caucasica GE-2004-039 - Georgia, Shatili	Georgia	Communis	2x	1	Collected in the wild in Republic of Georgia.
PI 657924	a550887-4349125-010319-487_H04	CPYR_2883.002	10.5251	Pass		Pyrus salicifolia	P. salicifolia GE-2006-111 - Georgia, Vashlovani	Georgia	Group 2	2x	1	Collected from the wild in the Republic of Georgia.
PI 540976	a550887-4349125-010319-487_H06	CPYR_1309.004	6.30299	Pass		Pyrus betulifolia	P. betulifolia	United States	Group 3	2x	1
PI 541789	a550887-4349125-010319-487_H08	CPYR_1373.001	15.5431	Pass		Pyrus hybrid	OPR-141	United States	Hybrids	2x	1
PI 541969	a550887-4349125-010319-487_H10	CPYR_2277.001	26.4787	Pass		Pyrus communis	Romania 17-4/5-32	Romania	Communis	2x	1	Cultivar selection
-	a550887-4349125-010319-487_H12	P0852	25.1181	Pass		Pyrus communis	Starking Délicious	NA	Communis	2x	1	same as Maxine
-	a550887-4349125-010319-487_H14	BM2000	25.1657	Pass		Pyrus communis	BM2000	Australia	Communis	2x	1
PI 541913	a550887-4349125-010319-487_H16	CPYR_7.001		Fail	QC CR	Pyrus pyrifolia	P. pyrifolia K-15 - Korea	Korea-South	Group 4	2x	1
PI 541647	a550887-4349125-010319-487_H18	CPYR_1284.001		Fail	QC CR	Pyrus fauriei	P. fauriei No. 4 - Korea	Korea-South	Group 3	2x	1
PI 688092	a550887-4349125-010319-487_H20	CPYR_2683.002	23.4659	Pass		Pyrus salicifolia	P. salicifolia A-53-14 (Russia)	Russian Federation	Group 2	2x	1
PI 541234	a550887-4349125-010319-487_H22	CPYR_397.002	26.8823	Pass		Pyrus communis	Monchallard	France	Communis	2x	1	Chance seedling
PI 617536	a550887-4349125-010319-487_I01	CPYR_2335.001	30.1389	Pass		Pyrus communis	Bartlett - French Compatible	United States	Communis	2x	1	Seedling selection
PI 637998	a550887-4349125-010319-487_I03	CPYR_2737.001	30.5354	Pass		Pyrus communis	Bartlett - Russet (Moyer)	Canada-Ontario	Communis	2x	1	Bud mutation of Bartlett
PI 280030	a550887-4349125-010319-487_I04	CPYR_84.003	24.5099	Pass		Pyrus communis	Beurré Jean van Geert	Belgium	Communis	2x	1	Chance seedling
PI 392321	a550887-4349125-010319-487_I05	CPYR_448.002	22.1151	Pass		Pyrus communis	Pautalia (=Jubileer D'ar)	Bulgaria	Communis	2x	1
PI 654916	a550887-4349125-010319-487_I06	CPYR_2441.001	27.6432	Pass		Pyrus hybrid	Romania 3/35 FE-12-139	Romania	Hybrids	2x	1
PI 312498	a550887-4349125-010319-487_I07	CPYR_2358.001	25.1965	Pass		Pyrus communis	Grumkower Butter Birne	NA	Communis	2x	1
PI 541990	a550887-4349125-010319-487_I08	CPYR_288.002	14.1726	Pass		Pyrus ussuriensis	Huangxianshui Li [Huang Hsing Sui Li]	China	Group 4	2x	1	old selection from Shandong Province complex hybrid of ussuriensis (x bretschneideri)
PI 617530	a550887-4349125-010319-487_I09	CPYR_2298.001	24.3404	Pass		Pyrus communis	Waterville	United States-Vermont	Communis	2x	1
PI 352634	a550887-4349125-010319-487_I10	CPYR_322.001	9.07333	Pass		Pyrus pyrifolia	Kosui	Japan	Group 4	2x	1	Kikusui x Wase Kozo
PI 541472	a550887-4349125-010319-487_I11	CPYR_1725.002	28.4517	Pass		Pyrus communis	Cascade	United States-Oregon	Communis	2x	1	Max Red Bartlett x Comice
PI 502175	a550887-4349125-010319-487_I13	CPYR_1635.001	22.9264	Pass		Pyrus communis	Urechelnite	Romania	Communis	2x	1
PI 541721	a550887-4349125-010319-487_I14	CPYR_767.001	21.7129	Pass		Pyrus hybrid	P. elaeagrifolia Olez 3 (hybrid) - Turkey	Turkey	Hybrids	2x	1	Seedling selection from Olez seedlot 3 collected in Turkey
PI 282974	a550887-4349125-010319-487_I16	CPYR_365.005		Fail	QC CR	Pyrus communis	Lukavanski	Czech Republic	Communis	2x	1
PI 617538	a550887-4349125-010319-487_I17	CPYR_2339.002	24.9947	Pass		Pyrus communis	Poite Berringer	NA	Communis	2x	1
PI 541535	a550887-4349125-010319-487_I18	CPYR_2198.003	25.8369	Pass		Pyrus communis	Doyenne du Comice - Crimson Gem	United States-Oregon	Communis	2x	1	Dark red sport of Regal Red
PI 657926	a550887-4349125-010319-487_I21	CPYR_2919.001	24.2759	Pass		Pyrus communis	Cabot	United States-Massachusetts	Communis	2x	1
PI 542003	a550887-4349125-010319-487_I22	CPYR_926.001	5.64438	Pass		Pyrus ussuriensis	P. ussuriensis No. 6 - Korea	Korea-South	Group 4	2x	1	Seedling selection from seed collected in Korea
PI 541722	a550887-4349125-010319-487_I23	CPYR_1059.005	30.7512	Pass		Pyrus hybrid	Ayers	United States-Tennessee	Hybrids	2x	1	Garber x Anjou
PI 300693	a550887-4349125-010319-487_J02	CPYR_38.001_06	30.5228	Pass		Pyrus communis	Bartlett	United Kingdom	Communis	2x	1
PI 541143	a550887-4349125-010319-487_J04	CPYR_76.002	26.5796	Pass		Pyrus communis	Beurré Fouqueray	France	Communis	2x	1
PI 688109	a550887-4349125-010319-487_J06	CPYR_2875.002	24.4314	Pass		Pyrus hybrid	B II-3 = 34 = 36 P. salicifolia	Russian Federation	Hybrids	2x	1
-	a550887-4349125-010319-487_J08	P2661	25.1223	Pass		Pyrus communis	Angélys	France	Communis	2x	1	Doyenné d'Hiver x Doyenné du Comice
PI 617526	a550887-4349125-010319-487_J10	CPYR_1494.001	10.5237	Pass		Pyrus hybrid	P. betulifolia 2 x P. call. 2	United States	Hybrids	2x	1	P. betulaefolia-2 x P. calleryana-2
PI 293842	a550887-4349125-010319-487_J12	CPYR_2062.001	19.7147	Pass		Pyrus communis subsp. pyraster	P. communis ssp. pyraster - Moldavia	Moldova	Communis	2x	1	Seedling selection from seed collected in Moldova
PI 49490	a550887-4349125-010319-487_J14	CPYR_3015.001	31.0049	Pass		Pyrus communis	Giant Seckel	United States-Oregon	Communis	2x	1
PI 665755	a550887-4349125-010319-487_J16	CPYR_2952.001	25.68	Pass		Pyrus salicifolia	P. salicifolia - Georgia G10-122	Georgia	Group 2	2x	1	Collected from the wild in the Republic of Georgia.
PI 541983	a550887-4349125-010319-487_J18	CPYR_1509.005	27.0056	Pass		Pyrus syriaca	P. syriaca No. 1 - Syria	Syria	Group 2	2x	1
-	a550887-4349125-010319-487_J20	P2751	29.6975	Pass		Pyrus hybrid	NY 10352	United States-New York	Hybrids	2x	1
PI 617533	a550887-4349125-010319-487_J22	CPYR_2330.001		Fail	QC CR	Pyrus calleryana	Cleveland Select (P. calleryana)	United States-Ohio	Group 3	2x	1
PI 324053	a550887-4349125-010319-487_J24	CPYR_2036.001	20.0762	Pass		Pyrus hybrid	P. hybrid - Ukraine	Ukraine	Hybrids	2x	1	Seedling selection from seedlot collected in Russia
PI 324037	a550887-4349125-010319-487_K01	CPYR_1194.001	13.0109	Pass		Pyrus communis subsp. caucasica	P. communis ssp. caucasica - Caucasus Mts.	Russian Federation	Communis	2x	1	Seedling selection from seedlot collected in Russia
PI 541360	a550887-4349125-010319-487_K02	CPYR_100.001	27.2018	Pass		Pyrus communis	Bonne d'Ezee	France	Communis	2x	1	Chance seedling
PI 665752	a550887-4349125-010319-487_K03	CPYR_2943.001	26.0597	Pass		Pyrus hybrid	Lemate	United States-South Carolina	Hybrids	2x	1
PI 437066	a550887-4349125-010319-487_K04	CPYR_906.001	24.6683	Pass		Pyrus communis	B-11	South Africa	Communis	2x	1
PI 541553	a550887-4349125-010319-487_K05	CPYR_2282.001	24.4552	Pass		Pyrus communis	Jeanne d'Arc	France	Communis	2x	1	Buerre Diel x Doyenne du Comice
PI 125404	a550887-4349125-010319-487_K06	CPYR_2359.001	21.9946	Pass		Pyrus communis	Pear from Michurinsk	Former Soviet Union	Communis	2x	1
PI 541426	a550887-4349125-010319-487_K07	CPYR_1366.001	26.0023	Pass		Pyrus communis	OHxF 282	United States-Oregon	Communis	2x	1	Old Home x Bartlett
PI 654952	a550887-4349125-010319-487_K08	CPYR_2771.001	12.8498	Pass		Pyrus sp.	Gorelde	Turkmenistan	Hybrids	2x	1
PI 541338	a550887-4349125-010319-487_K09	CPYR_1092.001	25.1727	Pass		Pyrus communis	Florida 11-25	United States	Communis	2x	1
PI 541057	a550887-4349125-010319-487_K10	CPYR_1268.002		Fail	QC CR	Pyrus calleryana	P. calleryana OSU-7	United States	Group 3	2x	1
PI 688125	a550887-4349125-010319-487_K11	CPYR_2704.002		Fail	dQC	Pyrus communis	QR 708-12 (P. communis rootstock clone)	United Kingdom	Communis	2x	1
PI 280031	a550887-4349125-010319-487_K12	CPYR_151.002	24.2899	Pass		Pyrus communis	Comte de Lamy	Belgium	Communis	2x	1	Chance seedling
PI 654917	a550887-4349125-010319-487_K13	CPYR_2445.001	13.5673	Pass		Pyrus ussuriensis	Chinfon Li	China	Group 4	2x	1
PI 324038	a550887-4349125-010319-487_K14	CPYR_2045.001	13.4622	Pass		Pyrus communis subsp. caucasica	P. communis ssp. caucasica - Caucasus Mts. Russia	Russian Federation	Communis	2x	1	Seedling selection from seedlot collected in Russia
PI 440631	a550887-4349125-010319-487_K15	CPYR_694.001	20.9366	Pass		Pyrus communis subsp. caucasica	P. communis ssp. caucasica - Gofitskoye	Russian Federation	Communis	2x	1	Seedling selection from seedlot collected in Russia.
PI 541562	a550887-4349125-010319-487_K16	CPYR_703.002	14.0115	Pass		Pyrus communis subsp. caucasica	P. communis ssp. caucasica Mag 6 - Pyatigorsk, Russia	Russian Federation	Communis	2x	1	Seedling selection from seed collected in Russia
PI 657927	a550887-4349125-010319-487_K17	CPYR_2920.001	31.4883	Pass		Pyrus hybrid	David	Canada-Saskatchewan	Hybrids	2x	1	Pyrus ussuriensis x Bartlett
PI 264194	a550887-4349125-010319-487_K18	CPYR_244.004	21.7438	Pass		Pyrus communis	Gieser Wildeman	Netherlands	Communis	2x	1
PI 541987	a550887-4349125-010319-487_K19	CPYR_134.001	15.9228	Pass		Pyrus ussuriensis	Chien Pa Li (=Pa Li)	China	Group 4	2x	1
PI 541755	a550887-4349125-010319-487_K20	CPYR_1007.001	12.6971	Pass		Pyrus hybrid	P. hybrid (salicifolia or elaeagrifolia) - Turkey	Turkey	Hybrids	2x	1	Collected from the wild in Turkey
PI 307544	a550887-4349125-010319-487_K21	CPYR_137.002	16.2143	Pass		Pyrus ussuriensis	Chui Chi Li	China	Group 4	2x	1
PI 541213	a550887-4349125-010319-487_K22	CPYR_340.001	23.5024	Pass		Pyrus communis	Lawson	United States-New York	Communis	2x	1	Chance seedling
PI 542014	a550887-4349125-010319-487_K23	CPYR_1204.001	7.14796	Pass		Pyrus ussuriensis	P. ussuriensis No. 4 - Korea	Korea	Group 4	2x	1	Seedling selection from seedlot collected in Korea
PI 541216	a550887-4349125-010319-487_K24	CPYR_352.004	25.7444	Pass		Pyrus communis	Lieutenant Poidevin	France	Communis	2x	1	Seedling selection
PI 688180	a550887-4349125-010319-487_L02	CPYR_2993.001	25.0676	Pass		Pyrus communis	Kings Valley Pear 2	United States-Oregon	Communis	2x	1
PI 478004	a550887-4349125-010319-487_L04	CPYR_1501.007	7.54172	Pass		Pyrus ussuriensis	P. ussuriensis 'McDermand' (Harbin)	China	Group 4	2x	1	Selection of seed-propagated variety from China
PI 541945	a550887-4349125-010319-487_L06	CPYR_890.001		Fail	QC CR	Pyrus regelii	P. regelii	Russian Federation	Group 2	2x	1
PI 542037	a550887-4349125-010319-487_L08	CPYR_880.001	16.7972	Pass		Pyrus ×phaeocarpa	P. x phaeocarpa	China	Hybrids	2x	1	Probably a seedling selection
PI 541564	a550887-4349125-010319-487_L10	CPYR_1602.001	13.7382	Pass		Pyrus communis subsp. caucasica	P. communis ssp. caucasica - P. Stark	NA	Communis	2x	1	Uncertain, seedling selection?
PI 665755	a550887-4349125-010319-487_L12	CPYR_2952.003	10.7437	Pass		Pyrus salicifolia	P. salicifolia - Georgia G10-122	Georgia	Group 2	2x	1
PI 541462	a550887-4349125-010319-487_L14	CPYR_2144.001	8.14848	Pass		Pyrus communis	G.28.120 (P-2363)	France	Communis	2x	1	Seedling selection
-	a550887-4349125-010319-487_L18	Gem	25.3941	Pass		Pyrus communis	Gem	United States-West Virginia	Communis	2x	1
PI 665786	a550887-4349125-010319-487_L20	CPYR_2644.002		Fail	QC CR	Pyrus pyrifolia	Nepal 5075	Nepal	Group 4	2x	1
PI 305300	a550887-4349125-010319-487_L22	CPYR_1198.001	6.05496	Pass		Pyrus ussuriensis	P. ussuriensis - China (from Vavilov)	United States	Group 4	2x	1	Seedling selection from seedlot collected in China
PI 541983	a550887-4349125-010319-487_L24	CPYR_1509.002	9.78658	Pass		Pyrus syriaca	P. syriaca No. 1 - Syria	Syria	Group 2	2x	1
PI 541538	a550887-4349125-010319-487_M01	CPYR_2207.001	23.4127	Pass		Pyrus communis	Rescue	Canada-British Columbia	Communis	2x	1
PI 688144	a550887-4349125-010319-487_M02	CPYR_2696.002	22.7849	Pass		Pyrus communis	Carigradsko Avce	Macedonia	Communis	2x	1
PI 657916	a550887-4349125-010319-487_M03	CPYR_2625.001	12.8862	Pass		Pyrus pyrifolia	Daisui Li	California	Group 4	2x	1	Kikusui x Tsu Li
PI 279339	a550887-4349125-010319-487_M04	CPYR_462.001	27.1149	Pass		Pyrus communis	President Drouard	France	Communis	2x	1
PI 172495	a550887-4349125-010319-487_M05	CPYR_1128.003	24.8981	Pass		Pyrus communis	Norhausen Forelle (Nordhäuser Forellenbirne)	Germany	Communis	2x	1
PI 541988	a550887-4349125-010319-487_M07	CPYR_259.003	14.331	Pass		Pyrus ussuriensis	Guar Li Sdlg No. 2	China	Group 4	2x	1	Seedling of cultivar Guar Li grown from seed collected in China by F.C. Reimer in 1917
PI 541148	a550887-4349125-010319-487_M08	CPYR_86.002	23.7532	Pass		Pyrus communis	Beurré Millet	France	Communis	2x	1
PI 260161	a550887-4349125-010319-487_M09	CPYR_490.004	23.2431	Pass		Pyrus communis	King Sobieski	Poland	Communis	2x	1
PI 541452	a550887-4349125-010319-487_M10	CPYR_1592.001	17.198	Pass		Pyrus communis	P. communis - root aphid resistant	United States	Communis	2x	1	Seedling selection from European seedlot selected by P. Westigard for root aphid resistance
PI 282982	a550887-4349125-010319-487_M11	CPYR_600.001	27.1485	Pass		Pyrus communis	Wawrzyniec	Czech Republic	Communis	2x	1
PI 541451	a550887-4349125-010319-487_M12	CPYR_1586.001	24.1974	Pass		Pyrus communis	Domestic Pear (OSU Seedling C)	United States	Communis	2x	1	Seedling selection C
PI 129643	a550887-4349125-010319-487_M13	CPYR_1162.003	26.7155	Pass		Pyrus communis	Winter Cole	Australia	Communis	2x	1	Seedling of cultivar Winter Nelis
PI 541157	a550887-4349125-010319-487_M14	CPYR_123.001	25.7711	Pass		Pyrus communis	California	California	Communis	2x	1	Max Red Bartlett x Comice
PI 541897	a550887-4349125-010319-487_M15	CPYR_270.001	12.257	Pass		Pyrus pyrifolia	Hawaii	Japan	Group 4	2x	1
PI 541274	a550887-4349125-010319-487_M16	CPYR_571.002	26.6258	Pass		Pyrus communis	Thornley	United States-Oregon	Communis	2x	1	Chance seedling
PI 541770	a550887-4349125-010319-487_M17	CPYR_1273.001	13.4467	Pass		Pyrus hybrid	P. betulifolia x P. calleryana	United States	Hybrids	2x	1	P. betulifolia x P. calleryana seedling selection
PI 293841	a550887-4349125-010319-487_M18	CPYR_2068.001	16.3586	Pass		Pyrus communis subsp. pyraster	P. communis ssp. pyraster - Kholorash	Moldova	Communis	2x	1	Seedling selection from seed collected in Moldova
PI 506364	a550887-4349125-010319-487_M19	CPYR_1574.001	12.5541	Pass		Pyrus hondoensis	P. hondoensis 'Iwate Mukaku'	Japan	Group 4	2x	1
PI 293833	a550887-4349125-010319-487_M20	CPYR_2067.001	16.5576	Pass		Pyrus communis subsp. pyraster	P. communis ssp. pyraster- Yedentsi Forest	Moldova	Communis	2x	1	Seedling selection from seed collected in Moldova.
PI 688119	a550887-4349125-010319-487_M21	CPYR_2960.001	24.9023	Pass		Pyrus communis	Rutter	United States-Pennsylvania	Communis	2x	1
PI 654920	a550887-4349125-010319-487_M22	CPYR_2449.001	23.9368	Pass		Pyrus communis	Colmar d'Ete	NA	Communis	2x	1
PI 541347	a550887-4349125-010319-487_M23	CPYR_1124.003	24.3558	Pass		Pyrus communis	Moe	Canada	Communis	2x	1	Zuckerbirne x Clapp Favorite
PI 617575	a550887-4349125-010319-487_M24	CPYR_2491.001	27.3265	Pass		Pyrus communis	Louise Bonne d'Avranches Panachee (=variagated)	France	Communis	2x	1
PI 665759	a550887-4349125-010319-487_N02	CPYR_2964.005	12.3411	Pass		Pyrus spinosa	P. spinosa ALB-2011-015	Albania	Group 2	2x	1
PI 691230	a550887-4349125-010319-487_N04	CPYR_2721.002	25.7332	Pass		Pyrus pyrifolia	Shoghori 1	Pakistan	Group 4	2x	1
PI 541505	a550887-4349125-010319-487_N06	CPYR_2110.004	23.9676	Pass		Pyrus communis	Nova	United States	Communis	2x	1
PI 541539	a550887-4349125-010319-487_N08	CPYR_2253.006	25.9757	Pass		Pyrus communis	Figue d'Alencon	France	Communis	2x	1
PI 665757	a550887-4349125-010319-487_N10	CPYR_2962.005	11.8409	Pass		Pyrus spinosa	P. spinosa ALB-2011-007	Albania	Group 2	2x	1
PI 665763	a550887-4349125-010319-487_N12	CPYR_2968.002	11.3014	Pass		Pyrus spinosa	P. spinosa ALB-2011-038	Albania	Group 2	2x	1
PI 688121	a550887-4349125-010319-487_N14	CPYR_2988.001	25.5034	Pass		Pyrus communis	Gem (US 71655-014)	United States-West Virginia	Communis	2x	1
PI 665757	a550887-4349125-010319-487_N16	CPYR_2962.006	10.6274	Pass		Pyrus spinosa	P. spinosa ALB-2011-007	Albania	Group 2	2x	1
PI 541241	a550887-4349125-010319-487_N18	CPYR_447.003	23.5822	Pass		Pyrus communis	Patten	United States-Iowa	Communis	2x	1
PI 688120	a550887-4349125-010319-487_N20	CPYR_2961.002	12.6985	Pass		Pyrus spinosa	P. spinosa ALB-2011-001	Albania	Group 2	2x	1
PI 665761	a550887-4349125-010319-487_N22	CPYR_2966.001	11.9642	Pass		Pyrus spinosa	P. spinosa ALB-2011-028	Albania	Group 2	2x	1
PI 541485	a550887-4349125-010319-487_N24	CPYR_2028.003	26.2489	Pass		Pyrus communis	Hessle	United Kingdom	Communis	2x	1	Chance seedling
PI 541290	a550887-4349125-010319-487_O01	CPYR_691.001	13.8139	Pass		Pyrus communis subsp. caucasica	P. communis ssp. caucasica Mag 1 - Pyatigorsk, Russia	Russian Federation	Communis	2x	1	Seedling selection from seedlot collected in Russia
PI 324029	a550887-4349125-010319-487_O02	CPYR_2038.001	20.875	Pass		Pyrus communis subsp. caucasica	P. communis ssp. caucasica - Stavropol	Russian Federation	Communis	2x	1
PI 483380	a550887-4349125-010319-487_O03	CPYR_1534.002	24.2367	Pass		Pyrus hybrid	Prague No. 2	Czech Republic	Hybrids	2x	1
PI 617531	a550887-4349125-010319-487_O04	CPYR_2299.001		Fail	QC CR	Pyrus fauriei	P. fauriei NA 56625	Korea-South	Group 3	2x	1
PI 617603	a550887-4349125-010319-487_O05	CPYR_2528.001		Fail	QC CR	Pyrus communis	Southern Bartlett	United States	Communis	2x	1
PI 541275	a550887-4349125-010319-487_O06	CPYR_582.003	24.7565	Pass		Pyrus communis	Triomphe de Vienne	France	Communis	2x	1	Seedling selection
PI 541197	a550887-4349125-010319-487_O07	CPYR_253.003	24.7509	Pass		Pyrus communis	Grand Champion (Gorham sport)	United States-Oregon	Communis	2x	1	Russet sport of Gorham
PI 541490	a550887-4349125-010319-487_O08	CPYR_2057.001	18.6623	Pass		Pyrus communis subsp. pyraster	P. communis ssp. pyraster 'Olez Brown' - Turkey	Turkey	Communis	2x	1	Seedling selection from seed collected in Turkey
PI 657928	a550887-4349125-010319-487_O09	CPYR_2921.001	26.9692	Pass		Pyrus hybrid	Parker	United States-Minnesota	Hybrids	2x	1	Open pollinated seedling of a Manchurian pear cultivar.
PI 541244	a550887-4349125-010319-487_O10	CPYR_461.003	25.6211	Pass		Pyrus communis	Precoce de Trevoux	France	Communis	2x	1
PI 541767	a550887-4349125-010319-487_O11	CPYR_1233.001	36.7614	Pass		Pyrus hybrid	Nijisseiki x Old Home	United States	Hybrids	2x	1	Nijisseiki x Old Home
PI 541280	a550887-4349125-010319-487_O12	CPYR_599.001	25.2946	Pass		Pyrus communis	Warner	United States-Indiana	Communis	2x	1
PI 541017	a550887-4349125-010319-487_O13	CPYR_671.001		Fail	QC CR	Pyrus calleryana	P. calleryana No. 11	United States	Group 3	2x	1
PI 541345	a550887-4349125-010319-487_O15	CPYR_1120.001	32.3193	Pass		Pyrus communis	Merricourt	United States-Tennessee	Communis	2x	1	Seckel x Late Faulkner
PI 542011	a550887-4349125-010319-487_O16	CIGC_35.001		Fail	QC CR	xSorbopyrus (intergeneric hybrid)	Baciu 1 (3x)	Romania	Outgroup	2x	1
PI 541402	a550887-4349125-010319-487_O17	CPYR_1325.001	23.0245	Pass		Pyrus communis	OHxF 40	United States-Oregon	Communis	2x	1	Old Home x Bartlett
PI 324048	a550887-4349125-010319-487_O18	CPYR_2054.001	13.2744	Pass		Pyrus communis subsp. caucasica	P. communis ssp. caucasica - Caucasus Mts. Russia	Russian Federation	Communis	2x	1	Seedling selection from seedlot collected in Russia
PI 541772	a550887-4349125-010319-487_O19	CPYR_1279.002	27.035	Pass		Pyrus hybrid	P. fascicularis	NA	Hybrids	2x	1
PI 541250	a550887-4349125-010319-487_O20	CPYR_483.002	20.8161	Pass		Pyrus communis	Reimer's Hybrid	United States	Communis	2x	1
PI 541193	a550887-4349125-010319-487_O22	CPYR_237.001	20.9268	Pass		Pyrus communis subsp. pyraster	French Resistant No. 1 - rootstock clone	United States	Communis	2x	1	Seedling selection
PI 540986	a550887-4349125-010319-487_O23	CPYR_1383.001	6.80465	Pass		Pyrus betulifolia	OPR-264 P. betulifolia	United States	Group 3	2x	1	P. betulifolia No. 3 seedling selection from Asian seedlot
PI 541479	a550887-4349125-010319-487_O24	CPYR_2022.001	25.6604	Pass		Pyrus communis	Laxinoua	NA	Communis	2x	1
PI 665762	a550887-4349125-010319-487_P02	CPYR_2967.002	11.0968	Pass		Pyrus spinosa	P. spinosa ALB-2011-034	Albania	Group 2	2x	1
PI 657923	a550887-4349125-010319-487_P04	CPYR_2882.002	16.9556	Pass		Pyrus sachokiana	P. sachokiana GE-2006-115 - Georgia	Georgia	Group 2	2x	1	Seed collected at research station in Republic of Georgia.
PI 665764	a550887-4349125-010319-487_P06	CPYR_2969.003	11.5242	Pass		Pyrus spinosa	P. spinosa ALB-2011-043	Albania	Group 2	2x	1
PI 665766	a550887-4349125-010319-487_P08	CPYR_2971.001	11.129	Pass		Pyrus spinosa	P. spinosa ALB-2011-067	Albania	Group 2	2x	1
PI 665768	a550887-4349125-010319-487_P10	CPYR_2973.001	11.2145	Pass		Pyrus spinosa	P. spinosa ALB-2011-072	Albania	Group 2	2x	1
PI 657923	a550887-4349125-010319-487_P12	CPYR_2882.004	31.4981	Pass		Pyrus sachokiana	P. sachokiana GE-2006-115 - Georgia	Georgia	Group 2	2x	1	Seed collected at research station in Republic of Georgia.
PI 325928	a550887-4349125-010319-487_P14	CPYR_940.002		Fail	QC CR	Pyrus dimorphophylla	P. dimorphophylla Vo 27 - Japan	Japan	Group 3	2x	1
PI 665768	a550887-4349125-010319-487_P16	CPYR_2973.002	10.9062	Pass		Pyrus spinosa	P. spinosa ALB-2011-072	Albania	Group 2	2x	1
PI 541471	a550887-4349125-010319-487_P18	CPYR_1721.004	17.3858	Pass		Pyrus communis	P. communis o.p. - Uzbekistan	Uzbekistan	Communis	2x	1	Open-pollinated from botanical collection
PI 541864	a550887-4349125-010319-487_P20	CPYR_1196.001	23.714	Pass		Pyrus nivalis	P. nivalis	Netherlands	Group 1	2x	1
PI 641279	a550887-4349125-010319-487_P22	CPYR_2587.002	5.78591	Pass		Pyrus regelii	P. regelii - Boraldy River Forest, Kazakhstan	Kazakhstan	Group 2	2x	1	Collected from the wild in Kazakhstan.
PI 665765	a550887-4349125-010319-487_P24	CPYR_2970.001	11.0169	Pass		Pyrus spinosa	P. spinosa ALB-2011-064	Albania	Group 2	2x	1
PI 305300	a550887-4349125-010319-488_A01	CPYR_1200.001	6.77522	Pass		Pyrus ussuriensis	P. ussuriensis - China (from Vavilov)	China	Group 4	2x	1	Seedling selection from seedlot collected in China
PI 654963	a550887-4349125-010319-488_A02	CPYR_2864.001	26.148	Pass		Pyrus communis	Sampionka	Serbia	Communis	2x	1	President Drouard x Bartlett
PI 541687	a550887-4349125-010319-488_A03	CPYR_1597.001	16.5856	Pass		Pyrus hondoensis	P. hondoensis	United States	Group 4	2x	1	Seedling selection E from seedlot from Japan
PI 541677	a550887-4349125-010319-488_A04	CPYR_806.002	8.78466	Pass		Pyrus hondoensis	P. hondoensis	United States	Group 4	2x	1	Seedling selection from seed originally collected in Japan
PI 617641	a550887-4349125-010319-488_A07	CPYR_2572.001	23.6593	Pass		Pyrus communis	Brignoles	France	Communis	2x	1
PI 541416	a550887-4349125-010319-488_A08	CPYR_1350.001	25.3899	Pass		Pyrus communis	OHxF 101	United States-Oregon	Communis	2x	1	Old Home x Bartlett
PI 144035	a550887-4349125-010319-488_A09	CPYR_1105.002	11.4373	Pass		Pyrus sp.	Laioyang 50	Canada	Hybrids	2x	1
PI 132284	a550887-4349125-010319-488_A10	CPYR_1134.002	25.4403	Pass		Pyrus communis	Petite Rousselet	France	Communis	2x	1
PI 271658	a550887-4349125-010319-488_A14	CPYR_148.001	25.8355	Pass		Pyrus communis	Doyenne du Comice	France	Communis	2x	1	Seedling selection
PI 183962	a550887-4349125-010319-488_A16	CPYR_1117.001	23.2543	Pass		Pyrus communis	Marqueza	Portugal	Communis	2x	1
PI 617568	a550887-4349125-010319-488_A17	CPYR_2427.005	18.1775	Pass		Pyrus salicifolia	P. salicifolia - Russia	Russian Federation	Group 2	2x	1
PI 189695	a550887-4349125-010319-488_A18	CPYR_1158.002	22.8298	Pass		Pyrus communis	Ulitchka	Yugoslavia	Communis	2x	1
PI 541388	a550887-4349125-010319-488_A19	CPYR_1168.001	25.3072	Pass		Pyrus communis	El Dorado	California	Communis	2x	1	Probably seedling of cultivar Bartlett
PI 541331	a550887-4349125-010319-488_A20	CPYR_1074.002	22.7079	Pass		Pyrus communis	Carigradsko Alice	Macedonia	Communis	2x	1
PI 541955	a550887-4349125-010319-488_A21	CPYR_565.001	15.3315	Pass		Pyrus ussuriensis	Tau Ma Li	China	Group 4	2x	1
PI 263680	a550887-4349125-010319-488_B02	CPYR_228.001	25.4376	Pass		Pyrus communis	Belle Lucrative (=Fondante D'Automne)	Belgium	Communis	2x	1
-	a550887-4349125-010319-488_B04	Horner4	25.1797	Pass		Pyrus communis	Horner4	United States-Oregon	Communis	2x	1
PI 131663	a550887-4349125-010319-488_B06	CPYR_445.001	25.8607	Pass		Pyrus communis	Passe Crassane Rouge	France	Communis	2x	1
PI 541159	a550887-4349125-010319-488_B08	CPYR_128.002	30.1963	Pass		Pyrus hybrid	Canner (Waite?)	United States	Hybrids	2x	1	P. pyrifolia hybrid, possibly a seedling of cv. Kieffer
PI 665760	a550887-4349125-010319-488_B10	CPYR_2965.003	18.2181	Pass		Pyrus communis subsp. pyraster	P. communis ssp. pyraster ALB-2011-024	Albania	Communis	2x	1
PI 541071	a550887-4349125-010319-488_B12	CPYR_1435.001	7.64262	Pass		Pyrus calleryana	P. calleryana	United States	Group 3	2x	1	Seedling selection from Asian seedlot
PI 278728	a550887-4349125-010319-488_B14	CPYR_338.001	11.9404	Pass		Pyrus hybrid	La Providence	India	Hybrids	2x	1
PI 638004	a550887-4349125-010319-488_B16	CPYR_2812.001	13.9106	Pass		Pyrus communis subsp. caucasica	P. communis ssp. caucasica - Armenia, Spitaki-1	Armenia	Communis	2x	1	Collected from the wild in Armenia.
PI 540982	a550887-4349125-010319-488_B18	CPYR_1379.001		Fail	QC CR	Pyrus betulifolia	OPR-260 P. betulifolia	United States	Group 3	2x	1
PI 541082	a550887-4349125-010319-488_B20	CPYR_1587.003	7.74211	Pass		Pyrus calleryana	P. calleryana - Crown Point 5-67	United States	Group 3	2x	1	Rootstock propagated from productive orchard tree from Crown Point orchard, Medford area
PI 541087	a550887-4349125-010319-488_B22	CPYR_1707.001	11.5998	Pass		Pyrus calleryana	P. calleryana o.p. - Uzbekistan	Uzbekistan	Group 3	2x	1	Open-pollinated from botanical collection
PI 541434	a550887-4349125-010319-488_B24	CPYR_1421.001	20.4139	Pass		Pyrus communis	P. communis OHxF?	United States	Communis	2x	1	Old Home x Farmingdale (?)
PI 617604	a550887-4349125-010319-488_C01	CPYR_2529.001	26.1172	Pass		Pyrus communis	Blakeley's Bartlett	United States	Communis	2x	1
PI 617659	a550887-4349125-010319-488_C02	CPYR_2604.001	35.4848	Pass		Pyrus hybrid	Broussard	United States-Louisiana	Hybrids	2x	1
PI 665740	a550887-4349125-010319-488_C04	CPYR_2533.001	25.3871	Pass		Pyrus communis	Concorde	United Kingdom	Communis	2x	1	Conference x Doyenne du Comice
PI 224087	a550887-4349125-010319-488_C06	CPYR_528.001	10.6274	Pass		Pyrus pyrifolia	Shinseiki	Japan	Group 4	2x	1	Nijiesiki x Chojuro
PI 541547	a550887-4349125-010319-488_C07	CPYR_2273.001	31.1618	Pass		Pyrus communis	Golden Spice	United States-Minnesota	Communis	2x	1
PI 540985	a550887-4349125-010319-488_C09	CPYR_1382.001	6.59165	Pass		Pyrus betulifolia	OPR-263 P. betulifolia	United States	Group 3	2x	1	P. betulifolia No. 3 seedling selection
PI 44151	a550887-4349125-010319-488_C10	CPYR_1148.001	14.202	Pass		Pyrus ussuriensis	Suan Li	China	Group 4	2x	1
PI 542016	a550887-4349125-010319-488_C11	CPYR_1286.001	6.13904	Pass		Pyrus ussuriensis	P. ussuriensis CJW	United States	Group 4	2x	1	Seedling selection from Asian seedlot
PI 541400	a550887-4349125-010319-488_C12	CPYR_1323.001	27.468	Pass		Pyrus communis	OHxF 267	United States-Oregon	Communis	2x	1	Old Home x Bartlett
PI 541085	a550887-4349125-010319-488_C14	CPYR_1171.003		Fail	QC CR	Pyrus calleryana	OPR-135 P. calleryana	United States	Group 3	2x	1
PI 255614	a550887-4349125-010319-488_C18	CPYR_371.001	25.7164	Pass		Pyrus communis	Madame Boutant	France	Communis	2x	1
PI 541834	a550887-4349125-010319-488_C19	CPYR_820.001	13.6485	Pass		Pyrus koehnei	P. koehnei hybrid	United States	Group 3	2x	1	Seedling selection from seedlot collected in Taiwan
PI 654936	a550887-4349125-010319-488_C20	CPYR_2706.001	22.2833	Pass		Pyrus communis	Bessemianka	Russian Federation	Communis	2x	1
PI 541717	a550887-4349125-010319-488_C21	CPYR_589.002	23.4603	Pass		Pyrus pashia	Variolosa (P. pashia hyb.)	NA	Group 4	2x	1
PI 541556	a550887-4349125-010319-488_C22	CPYR_2285.001	31.6999	Pass		Pyrus hybrid	Ure	Canada	Hybrids	2x	1
PI 541413	a550887-4349125-010319-488_C23	CPYR_1342.001	26.0934	Pass		Pyrus communis	OHxF 2	United States-Oregon	Communis	2x	1	Old Home x Bartlett
PI 322710	a550887-4349125-010319-488_C24	CPYR_902.001	34.836	Pass		Pyrus communis	P. communis - Ukraine	Ukraine	Communis	2x	1	Possibly originally collected wild
PI 541786	a550887-4349125-010319-488_D02	CPYR_1358.001	34.4016	Pass		Pyrus hybrid	Burkett x P. betulifolia	United States-Oregon	Hybrids	2x	1	Burkett x P. betulifolia seedling selection
PI 324044	a550887-4349125-010319-488_D04	CPYR_2050.001	13.1861	Pass		Pyrus communis subsp. caucasica	P. communis ssp. caucasica - Caucasus Mts. Russia	Russian Federation	Communis	2x	1	Seedling selection from seedlot collected in Russia
PI 293843	a550887-4349125-010319-488_D06	CPYR_1604.001	15.8247	Pass		Pyrus hybrid	P. elaeagrifolia hybrid - Crimea	Ukraine	Hybrids	2x	1	Seedling selection from seed collected in Crimea, Ukraine
PI 540944	a550887-4349125-010319-488_D15	CPYR_658.001	6.52859	Pass		Pyrus betulifolia	P. betulifolia	United States	Group 3	2x	1	Seedling selection from seed collected in China by Reimer
PI 617551	a550887-4349125-010319-488_D17	CPYR_2365.002	26.4367	Pass		Pyrus communis	Hall 20	United States	Communis	2x	1
CPYR 3005	a550887-4349125-010319-488_D18	CPYR_3005.001	23.9045	Pass		Pyrus communis	Belle Pear	United States	Communis	2x	1
PI 541732	a550887-4349125-010319-488_D19	CPYR_760.001		Fail	QC CR	Pyrus hybrid	P. dimorphophylla x P. calleryana	United States	Hybrids	2x	1
PI 541454	a550887-4349125-010319-488_D21	CPYR_1613.001	25.8173	Pass		Pyrus communis	OHxF 58	United States-Oregon	Communis	2x	1	Old Home x Bartlett
PI 617598	a550887-4349125-010319-488_D23	CPYR_2522.003	25.8369	Pass		Pyrus korshinskyi	P. korshinskyi 94011 - Kyrgyzstan	Kyrgyzstan	Group 1	2x	1	Open pollinated seed from single tree growing in a group of P. communis and P. korshinskyi. Thus maybe hybrid or pure.
PI 541652	a550887-4349125-010319-488_D24	CPYR_1496.001		Fail	QC CR	Pyrus fauriei	P. fauriei 12-14	Korea-South	Group 3	2x	1
PI 688106	a550887-4349125-010319-488_E01	CPYR_2639.003	15.962	Pass		Pyrus pyrifolia	Yang-Nai-Shian	China	Group 4	2x	1
PI 617502	a550887-4349125-010319-488_E02	CPYR_63.001	27.8436	Pass		Pyrus communis	Anjou	Belgium	Communis	2x	1
PI 541453	a550887-4349125-010319-488_E03	CPYR_1607.001	16.6669	Pass		Pyrus communis	P. communis (Imp. Fr.)	United States	Communis	2x	1	Seedling selection from seedlot collected in France
PI 617557	a550887-4349125-010319-488_E04	CPYR_2374.001	26.0541	Pass		Pyrus communis	Placer	NA	Communis	2x	1
PI 324172	a550887-4349125-010319-488_E05	CPYR_1191.001	23.3566	Pass		Pyrus communis subsp. caucasica	P. communis ssp. caucasica - Yalta	Crimea	Communis	2x	1	Seedling from seedlot collected wild in USSR
PI 617562	a550887-4349125-010319-488_E06	CPYR_2385.001	26.148	Pass		Pyrus communis	Harrow Sweet (HW 609) - IPR expires 2015	Canada-Ontario	Communis	2x	1	Bartlett x (Old Home x Early Sweet)
PI 352636	a550887-4349125-010319-488_E07	CPYR_529.001	10.5629	Pass		Pyrus pyrifolia	Shinsui	Japan	Group 4	2x	1
PI 688155	a550887-4349125-010319-488_E09	CPYR_2759.001	36.3003	Pass		Pyrus hybrid	Nak I - Pakistan	Pakistan	Hybrids	2x	1
PI 436538	a550887-4349125-010319-488_E10	CPYR_101.001	30.5873	Pass		Pyrus communis	BP-1 (Bien Donne 1)	South Africa	Communis	2x	1
PI 654927	a550887-4349125-010319-488_E11	CPYR_2655.002	27.9711	Pass		Pyrus communis	Gompapa	Pakistan	Communis	2x	1
PI 483400	a550887-4349125-010319-488_E12	CPYR_1550.001	26.099	Pass		Pyrus communis subsp. pyraster	Projnjaca	Yugoslavia	Communis	2x	1
PI 300693	a550887-4349125-010319-488_E13	CPYR_38.001_09	30.534	Pass		Pyrus communis	Bartlett	United Kingdom	Communis	2x	1
PI 691226	a550887-4349125-010319-488_E14	CPYR_2628.003	23.77	Pass		Pyrus communis	Para Toto R-091	Romania	Communis	2x	1
PI 617594	a550887-4349125-010319-488_E16	CPYR_2518.001	24.8925	Pass		Pyrus communis	Potomac	United States-Maryland	Communis	2x	1
PI 541810	a550887-4349125-010319-488_E17	CPYR_1703.001	25.5623	Pass		Pyrus hybrid	P. hybrid V-103 - Nepal	Nepal	Hybrids	2x	1	Collected from the wild in Nepal
PI 617552	a550887-4349125-010319-488_E18	CPYR_2369.001	25.4334	Pass		Pyrus communis	Cedar Lane Farm 1	United States	Communis	2x	1
PI 541514	a550887-4349125-010319-488_E19	CPYR_2122.005		Fail	QC CR	Pyrus communis	Duchesse Bererd	France	Communis	2x	1
PI 617532	a550887-4349125-010319-488_E20	CPYR_2329.001	25.055	Pass		Pyrus communis	Colette	United States-Illinois	Communis	2x	1
PI 541140	a550887-4349125-010319-488_E21	CPYR_70.003	26.6104	Pass		Pyrus communis	Beurré de Saint Nicolas	France	Communis	2x	1	Chance seedling
PI 318867	a550887-4349125-010319-488_E22	CPYR_347.001	21.7199	Pass		Pyrus communis	Leopardo Morettini	Italy	Communis	2x	1	Coscia x Decana d'Inverno (Doyenne d'Hiver)
PI 280034	a550887-4349125-010319-488_E23	CPYR_292.001	24.0531	Pass		Pyrus communis	Huyshe's Victoria	United Kingdom	Communis	2x	1	Marie Louise x Gansel's Bergamot
PI 541184	a550887-4349125-010319-488_E24	CPYR_204.001	24.594	Pass		Pyrus communis	Early Seckel	United States-New York	Communis	2x	1	Seedling of cultivar Seckel
PI 541271	a550887-4349125-010319-488_F01	CPYR_567.001	22.1838	Pass		Pyrus communis	Taynton Squash	United Kingdom	Communis	2x	1	Very old English cultivar.
PI 325927	a550887-4349125-010319-488_F02	CPYR_939.001		Fail	QC CR	Pyrus dimorphophylla	P. dimorphophylla - Japan	Japan	Group 3	2x	1
PI 541769	a550887-4349125-010319-488_F03	CPYR_1241.001	13.7634	Pass		Pyrus hybrid	P. pashia x P. betulifolia	United States	Hybrids	2x	1	P. pashia x P. betulaefolia seedling selection
PI 541372	a550887-4349125-010319-488_F05	CPYR_733.001	26.1158	Pass		Pyrus communis	OHxF 226	United States-Oregon	Communis	2x	1	Old Home x Bartlett
PI 325930	a550887-4349125-010319-488_F06	CPYR_1388.001		Fail	QC CR	Pyrus dimorphophylla	P. dimorphophylla - Japan	Japan	Group 3	2x	1
PI 693199	a550887-4349125-010319-488_F08	CPYR_2667.003		Fail	QC CR	Pyrus pashia	Kharnak III (donkey pear)	Pakistan	Group 4	2x	1
PI 541124	a550887-4349125-010319-488_F09	CPYR_35.001	23.4828	Pass		Pyrus communis	Barnet	United Kingdom	Communis	2x	1	Parentage unknown
PI 392325	a550887-4349125-010319-488_F10	CPYR_705.001	24.5393	Pass		Pyrus communis	Kustendil No. 980	Bulgaria	Communis	2x	1
PI 541780	a550887-4349125-010319-488_F11	CPYR_1348.001	34.3245	Pass		Pyrus hybrid	P-79 x P. betulifolia	United States-Oregon	Hybrids	2x	1	P-79 x P. betulaefolia seedling selection
PI 540971	a550887-4349125-010319-488_F12	CPYR_1261.001	6.10961	Pass		Pyrus betulifolia	P. betulifolia	United States	Group 3	2x	1	Seedling selection from Asian seedlot
PI 541862	a550887-4349125-010319-488_F13	CPYR_864.001	22.7765	Pass		Pyrus nivalis	P. nivalis	United States	Group 1	2x	1	Seedling selection from seed collected somewhere in Europe
PI 541422	a550887-4349125-010319-488_F14	CPYR_1362.001	23.4253	Pass		Pyrus communis	OHxF 247	United States-Oregon	Communis	2x	1	Old Home x Bartlett
PI 483383	a550887-4349125-010319-488_F15	CPYR_1537.001	21.4929	Pass		Pyrus communis subsp. pyraster	P. communis ssp. pyraster - Poland	Poland	Communis	2x	1	Chance seedling
PI 506378	a550887-4349125-010319-488_F16	CPYR_1670.001	22.862	Pass		Pyrus communis	Romania Perry Pear	Yugoslavia	Communis	2x	1
PI 541570	a550887-4349125-010319-488_F17	CPYR_738.001	9.42365	Pass		Pyrus cordata	P. cordata - Turkey	Turkey	Group 1	2x	1	Seedling selection from seed collected in Turkey
PI 540946	a550887-4349125-010319-488_F18	CPYR_656.001	6.44031	Pass		Pyrus betulifolia	OPR-114 P. betulifolia No. 5	United States	Group 3	2x	1
PI 541370	a550887-4349125-010319-488_F19	CPYR_726.001	24.4735	Pass		Pyrus communis	OHxF 97	United States-Oregon	Communis	2x	1	Old Home x Bartlett
PI 352638	a550887-4349125-010319-488_F20	CPYR_527.002	10.9819	Pass		Pyrus pyrifolia	Shinseiho	Japan	Group 4	2x	1	Suisei x Shinko
PI 541549	a550887-4349125-010319-488_F21	CPYR_2278.002	33.1166	Pass		Pyrus communis	Pioneer No. 3	Canada-Alberta	Communis	2x	1
PI 617514	a550887-4349125-010319-488_F22	CPYR_1219.001	7.8402	Pass		Pyrus calleryana	P. calleryana PC-7 (hybrid)	United States	Group 3	2x	1	Seedling selection
PI 541420	a550887-4349125-010319-488_F23	CPYR_1360.001	24.2465	Pass		Pyrus communis	OHxF 230	United States-Oregon	Communis	2x	1	Old Home x Bartlett
PI 541760	a550887-4349125-010319-488_F24	CPYR_1226.001	13.1385	Pass		Pyrus hybrid	Chieh Li x Japanese Golden Russet (Decline Resist.)	United States	Hybrids	2x	1	Chieh Li x Jap. Gold Russet
PI 541283	a550887-4349125-010319-488_G01	CPYR_605.002	26.4409	Pass		Pyrus communis	Wilder Early	United States-New York	Communis	2x	1	Chance seedling
PI 541332	a550887-4349125-010319-488_G02	CPYR_1080.002	30.5368	Pass		Pyrus communis	Claude Blanchet	France	Communis	2x	1
PI 293842	a550887-4349125-010319-488_G03	CPYR_2059.001	15.6482	Pass		Pyrus communis subsp. pyraster	P. communis ssp. pyraster - Moldavia	Moldova	Communis	2x	1	Seedling selection from seed collected in Moldova
PI 617548	a550887-4349125-010319-488_G04	CPYR_2362.001	37.1159	Pass		Pyrus hybrid	Spalding	Georgia	Hybrids	2x	1	Unknown, although one parent is probably cv 'Pineapple'
PI 502173	a550887-4349125-010319-488_G05	CPYR_1633.001	17.3802	Pass		Pyrus communis subsp. pyraster	P. communis ssp. pyraster - Poland	Poland	Communis	2x	1	Collected from the wild in Poland
PI 540922	a550887-4349125-010319-488_G06	CPYR_639.001	13.1076	Pass		Pyrus spinosa	P. spinosa (amygdaliformis) - Greece	Greece	Group 2	2x	1
PI 617579	a550887-4349125-010319-488_G07	CPYR_2500.001	24.622	Pass		Pyrus communis	Mission La Purisima Pear 1-A	United States	Communis	2x	1
PI 541156	a550887-4349125-010319-488_G08	CPYR_121.001	23.934	Pass		Pyrus communis	Butt	United Kingdom	Communis	2x	1
PI 324128	a550887-4349125-010319-488_G09	CPYR_254.002	25.0648	Pass		Pyrus communis	Grata	Italy	Communis	2x	1	Butirra Clairgeau x Williams (magnetic pollen)
PI 617503	a550887-4349125-010319-488_G11	CPYR_174.002	24.4721	Pass		Pyrus communis	Directeur Hardy	France	Communis	2x	1	Seedling selection
PI 324121	a550887-4349125-010319-488_G12	CPYR_176.001	22.2258	Pass		Pyrus communis	Djebel Goutava	Italy	Communis	2x	1
PI 127716	a550887-4349125-010319-488_G13	CPYR_534.001	29.1383	Pass		Pyrus hybrid	Sladky	United States	Hybrids	2x	1	Russian sand pear x Lincoln
PI 541957	a550887-4349125-010319-488_G14	CPYR_686.002	21.3066	Pass		Pyrus communis subsp. caucasica	P. communis ssp. caucasica F-25	NA	Communis	2x	1
PI 540990	a550887-4349125-010319-488_G15	CPYR_1442.001	6.66452	Pass		Pyrus betulifolia	P. betulifolia	United States	Group 3	2x	1	Seedling selection C of P. betulifolia-3 from Asian seedlot
PI 617547	a550887-4349125-010319-488_G16	CPYR_2360.002	23.6243	Pass		Pyrus communis	Lakewood	United States	Communis	2x	1	probably seedling of unknown parentage
PI 617634	a550887-4349125-010319-488_G17	CPYR_2564.001	23.1114	Pass		Pyrus communis	Tait Dropmore	Canada	Communis	2x	1	Open pollinated seedling of Patten
PI 541554	a550887-4349125-010319-488_G18	CPYR_2283.001	22.5425	Pass		Pyrus communis	Frangipane	France	Communis	2x	1
PI 541607	a550887-4349125-010319-488_G19	CPYR_1399.001		Fail	QC CR	Pyrus dimorphophylla	P. dimorphophylla	Japan	Group 3	2x	1
PI 657920	a550887-4349125-010319-488_G20	CPYR_2846.005	23.3721	Pass		Pyrus communis	Zebra Pear O.P. - Georgia	Georgia	Communis	2x	1	Fruit purchased at market in Gori, Georgia.
PI 541058	a550887-4349125-010319-488_G21	CPYR_1269.002		Fail	dQC	Pyrus calleryana	P. calleryana OSU-8	United States	Group 3	2x	1
PI 665776	a550887-4349125-010319-488_G22	CPYR_2440.002	25.5567	Pass		Pyrus communis	Napoca	Romania	Communis	2x	1
PI 64229	a550887-4349125-010319-488_G23	CPYR_588.001	35.1821	Pass		Pyrus hybrid	Van Fleet Hybrid No. 1	United States	Hybrids	2x	1	P. communis x chinese type
PI 691242	a550887-4349125-010319-488_G24	CPYR_2880.001	23.8583	Pass		Pyrus pyrifolia	Utrennaya Svezheste	Russian Federation	Group 4	2x	1
PI 691243	a550887-4349125-010319-488_H01	CPYR_2866.001	14.2343	Pass		Pyrus communis subsp. caucasica	P. communis ssp. caucasica -Tavush Marz, Armenia	Armenia	Communis	2x	1	Collected from the wild in Armenia.
PI 293838	a550887-4349125-010319-488_H02	CPYR_2060.001	22.3127	Pass		Pyrus communis subsp. pyraster	P. communis ssp. pyraster - Crimea	Ukraine	Communis	2x	1	Seedling selection from seed collected in Ukraine
PI 542012	a550887-4349125-010319-488_H03	CPYR_3.003		Fail	QC CR	Pyrus ussuriensis	P. ussuriensis K-8 (hybrid) - Korea	Korea-South	Group 4	2x	1
PI 324047	a550887-4349125-010319-488_H04	CPYR_2053.001	13.8433	Pass		Pyrus communis subsp. caucasica	P. communis ssp. caucasica - Caucasus Mts. Russia	Russian Federation	Communis	2x	1	Seedling selection from seed collected in Russia
PI 654942	a550887-4349125-010319-488_H05	CPYR_2753.002		Fail	QC CR	Pyrus hybrid	SIM 117-11 (Alberta, Canada)	Canada	Hybrids	2x	1
PI 132091	a550887-4349125-010319-488_H06	CPYR_677.001	15.7631	Pass		Pyrus fauriei	P. fauriei Arnold Arboretum	Korea-South	Group 3	2x	1	Seedling selection from seedlot collected in Korea
PI 541675	a550887-4349125-010319-488_H08	CPYR_801.001	6.66452	Pass		Pyrus hondoensis	P. hondoensis	United States	Group 4	2x	1	Seedling selection from seed originally collected in Japan
PI 541665	a550887-4349125-010319-488_H10	CPYR_792.001	4.94374	Pass		Pyrus gharbiana	P. gharbiana	Morocco	Group 1	2x	1	Seedling selection from seed collected wild in Morocco
PI 440632	a550887-4349125-010319-488_H11	CPYR_697.001	20.0776	Pass		Pyrus communis subsp. caucasica	P. communis ssp. caucasica - Gofitskoye	Russian Federation	Communis	2x	1	Seedling selection from seedlot collected in Russia
PI 617680	a550887-4349125-010319-488_H12	CPYR_2703.002	28.1715	Pass		Pyrus communis	QR 708-2 (P. communis rootstock clone)	United Kingdom	Communis	2x	1	Pyrus communis 'BP-1' x 'Old Home'
PI 235575	a550887-4349125-010319-488_H13	CPYR_884.002	12.0048	Pass		Pyrus pyrifolia	P. pyrifolia No. 579	Japan	Group 4	2x	1	Collected from the wild in Japan
PI 541011	a550887-4349125-010319-488_H14	CPYR_670.001		Fail	QC CR	Pyrus calleryana	P. calleryana	United States	Group 3	2x	1
PI 617520	a550887-4349125-010319-488_H15	CPYR_1427.001		Fail	QC CR	Pyrus calleryana	OPR-168 P. calleryana	United States	Group 3	2x	1
PI 541013	a550887-4349125-010319-488_H16	CPYR_662.001		Fail	QC CR	Pyrus calleryana	Capital (P. calleryana)	United States	Group 3	2x	1
PI 541912	a550887-4349125-010319-488_H17	CPYR_6.008	13.6233	Pass		Pyrus pyrifolia	P. pyrifolia K-16 - Korea	Korea-South	Group 4	2x	1	Collected from the wild in Korea
PI 541925	a550887-4349125-010319-488_H18	CPYR_1464.001	12.5681	Pass		Pyrus pyrifolia	P. pyrifolia Kor 2	United States	Group 4	2x	1	Seedling selection B from OP seed from Korea
PI 541795	a550887-4349125-010319-488_H20	CPYR_1453.001		Fail	dQC	Pyrus hybrid	P. hybrid	United States	Hybrids	2x	1
PI 540989	a550887-4349125-010319-488_H22	CPYR_1441.001	6.7584	Pass		Pyrus betulifolia	P. betulifolia	United States	Group 3	2x	1	Seedling selection B of P. betulifolia-3 from Asian seedlot
PI 541790	a550887-4349125-010319-488_H23	CPYR_1376.001	6.6491	Pass		Pyrus hybrid	P. betulifolia-1 x P-12	United States	Hybrids	2x	1	P. betulaefolia-1 x P-12 seedling selection
PI 541924	a550887-4349125-010319-488_H24	CPYR_1298.001	6.47675	Pass		Pyrus pyrifolia	P. pyrifolia Kor 5	Korea-South	Group 4	2x	1	Seedling selection from seed collected in Korea
PI 641282	a550887-4349125-010319-488_I01	CPYR_2724.001	27.0799	Pass		Pyrus communis	Comtesse de Paris	Belgium	Communis	2x	1
PI 541520	a550887-4349125-010319-488_I02	CPYR_2128.001	30.5985	Pass		Pyrus communis	Swiss Bergamotte	Switzerland	Communis	2x	1	Variegated sport of Bergamotte Suisse
PI 324043	a550887-4349125-010319-488_I03	CPYR_2049.001	13.6906	Pass		Pyrus communis subsp. caucasica	P. communis ssp. caucasica - Caucasus Mts. Russia	Russian Federation	Communis	2x	1	Seedling selection from seedlot collected in Russia
PI 541616	a550887-4349125-010319-488_I04	CPYR_771.001	12.1155	Pass		Pyrus elaeagrifolia	P. elaeagrifolia WB-5 - Turkey	Turkey	Group 2	2x	1	Seedling selection from seed collected in Turkey
PI 324031	a550887-4349125-010319-488_I05	CPYR_2040.001	13.4243	Pass		Pyrus communis subsp. caucasica	P. communis ssp. caucasica - Stavropol	Russian Federation	Communis	2x	1
PI 693200	a550887-4349125-010319-488_I07	CPYR_2657.002	25.3058	Pass		Pyrus pyrifolia	Nashpati I	Pakistan	Group 4	2x	1
PI 300693	a550887-4349125-010319-488_I08	CPYR_38.001_09	30.5284	Pass		Pyrus communis	Bartlett	United Kingdom	Communis	2x	1
PI 541391	a550887-4349125-010319-488_I09	CPYR_1248.001	17.8384	Pass		Pyrus communis subsp. pyraster	P. communis ssp. pyraster Olez 5 - Turkey	Turkey	Communis	2x	1	Seedling selection A from seedlot collected in Turkey
-	a550887-4349125-010319-488_I10	P2507	26.333	Pass		Pyrus communis	Michigan 437	United States-Maryland	Communis	2x	1
PI 638008	a550887-4349125-010319-488_I11	CPYR_2816.006	15.8892	Pass		Pyrus communis subsp. caucasica	P. communis ssp. caucasica - Armenia 37	Armenia	Communis	2x	1	Collected from the wild in Armenia.
-	a550887-4349125-010319-488_I12	P2795	30.0758	Pass		Pyrus hybrid	Euras	Romania	Hybrids	2x	1	[hybride (Pyrus Serotina x Olivier de Serre)??] x Doyenné d'Hiver
PI 693201	a550887-4349125-010319-488_I13	CPYR_2930.002	22.9306	Pass		Pyrus communis	Lutsu Voipirn	Estonia	Communis	2x	1
-	a550887-4349125-010319-488_I14	NJA2R59T69	39.1421	Pass		Pyrus hybrid	NJA2R59T69	United States	Hybrids	2x	1
PI 541461	a550887-4349125-010319-488_I15	CPYR_2143.001	27.2228	Pass		Pyrus communis	F.12-173 (P-2366)	France	Communis	2x	1	Seedling selection
PI 688152	a550887-4349125-010319-488_I16	CPYR_2976.001	25.8509	Pass		Pyrus communis	Doyenne du Comice - Taylor's Gold	New Zealand	Communis	2x	1	Russeted sport of Doyenne du Comice
PI 665781	a550887-4349125-010319-488_I17	CPYR_2638.002	13.4131	Pass		Pyrus ×bretschneideri	Tsu Li 1	China	Group 4	2x	1
PI 541985	a550887-4349125-010319-488_I18	CPYR_27.002	16.8322	Pass		Pyrus ussuriensis	Ba Li Xiang [Ba Li Hsiang]	China	Group 4	2x	1	old pear local selection from Liaoning and Hebei Provinces
PI 541238	a550887-4349125-010319-488_I19	CPYR_427.001	26.0471	Pass		Pyrus hybrid	OH 50 fire blight resistant rootstock	United States	Hybrids	2x	1	Old Home seedling selection
PI 267863	a550887-4349125-010319-488_I20	CPYR_455.002	15.5823	Pass		Pyrus ussuriensis	Ping Guo Li [Pingo Li]	China	Group 4	2x	1	old selection from Jiling Province
PI 137078	a550887-4349125-010319-488_I21	CPYR_464.002	24.5463	Pass		Pyrus communis	President Hardy	NA	Communis	2x	1
PI 541989	a550887-4349125-010319-488_I22	CPYR_269.003	11.9207	Pass		Pyrus ussuriensis	Hau Kai	China	Group 4	2x	1
PI 617623	a550887-4349125-010319-488_I23	CPYR_2551.008		Fail	QC CR	Pyrus hybrid	P. caucasica hybrid KAZ 95-05-04 - Kazakhstan	Kazakhstan	Hybrids	2x	1
PI 654922	a550887-4349125-010319-488_I24	CPYR_2443.002	11.3364	Pass		Pyrus ×bretschneideri	Tsu Li No. 2	China	Group 4	2x	1
PI 541763	a550887-4349125-010319-488_J01	CPYR_1229.001	10.0416	Pass		Pyrus pyrifolia	Japanese Golden Russet x Mikado (Decline Susc.)	United States	Group 4	2x	1	Japanese Golden Russett x Mikado
PI 541825	a550887-4349125-010319-488_J02	CPYR_808.001		Fail	QC CR	Pyrus koehnei	P. koehnei	United States	Group 3	2x	1
PI 440630	a550887-4349125-010319-488_J04	CPYR_730.001	15.5487	Pass		Pyrus communis subsp. caucasica	P. communis ssp. caucasica - Yankulyski	Russian Federation	Communis	2x	1	Seedling selection from seedlot collected in Russia
PI 315064	a550887-4349125-010319-488_J05	CPYR_268.001	31.414	Pass		Pyrus ussuriensis	Hang Pa Li	China	Group 4	2x	1
PI 541012	a550887-4349125-010319-488_J06	CPYR_1170.002		Fail	QC CR	Pyrus calleryana	OPR-157 P. calleryana	United States	Group 3	2x	1
PI 542021	a550887-4349125-010319-488_J07	CPYR_1573.002		Fail	QC CR	Pyrus ussuriensis	P. ussuriensis 174 - Korea	Korea-South	Group 4	2x	1
PI 541688	a550887-4349125-010319-488_J08	CPYR_2109.001	15.6286	Pass		Pyrus hondoensis	P. hondoensis	Japan	Group 4	2x	1	P. hondoensis artificially selfed in phytotron
PI 541762	a550887-4349125-010319-488_J10	CPYR_1228.001	11.279	Pass		Pyrus pyrifolia	Japanese Golden Russet x Mikado (Decline Resist.)	United States	Group 4	2x	1	Jap. Gold. Russet x Mikado
PI 541944	a550887-4349125-010319-488_J11	CPYR_889.001	3.15289	Pass		Pyrus regelii	P. regelii No. 3 (hybrid)	Former Soviet Union	Group 2	2x	1
PI 440630	a550887-4349125-010319-488_J12	CPYR_729.001	16.4525	Pass		Pyrus communis subsp. caucasica	P. communis ssp. caucasica - Yankulyski	Russian Federation	Communis	2x	1	Seedling selection from seedlot collected in Russia
PI 104299	a550887-4349125-010319-488_J14	CPYR_1126.001	35.716	Pass		Pyrus communis	Morocco Common Pear	Morocco	Communis	2x	1	Probably a seedling selection
PI 541523	a550887-4349125-010319-488_J15	CPYR_2131.001	26.155	Pass		Pyrus communis	Bergamotte de Baillargues	NA	Communis	2x	1
PI 617598	a550887-4349125-010319-488_J16	CPYR_2522.005	13.4243	Pass		Pyrus korshinskyi	P. korshinskyi 94011 - Kyrgyzstan	Kyrgyzstan	Group 1	2x	1	Open pollinated seed from single tree growing in a group of P. communis and P. korshinskyi. Thus maybe hybrid or pure.
PI 541787	a550887-4349125-010319-488_J17	CPYR_1370.001	36.2387	Pass		Pyrus hybrid	Old Home x P. betulifolia-1	United States-Oregon	Hybrids	2x	1
PI 665746	a550887-4349125-010319-488_J19	CPYR_2937.002	10.1747	Pass		Pyrus ussuriensis	P. ussuriensis JPN-2009-145	Japan	Group 4	2x	1	Collected from the wild in Iwate, Japan.
PI 641300	a550887-4349125-010319-488_J20	CPYR_2844.003	15.0498	Pass		Pyrus communis subsp. caucasica	P. communis ssp. caucasica GE-2004-131 - Georgia, Kharagauli	Georgia	Communis	2x	1	Collected in the wild in Republic of Georgia.
PI 657932	a550887-4349125-010319-488_J22	CPYR_2935.002	17.2372	Pass		Pyrus salicifolia	P. salicifolia - AZN-91 Azerbaijan	Azerbaijan	Group 2	2x	1	Collected from the wild in Azerbaijan.
PI 541976	a550887-4349125-010319-488_J23	CPYR_912.001		Fail	QC CR	Pyrus syriaca	P. syriaca - Israel	Israel	Group 2	2x	1
PI 541911	a550887-4349125-010319-488_J24	CPYR_5.009	12.8274	Pass		Pyrus pyrifolia	P. pyrifolia K-31 - Korea	Korea-South	Group 4	2x	1	Collected from the wild in Korea, possible hybrid
PI 506367	a550887-4349125-010319-488_K01	CPYR_1579.001	13.5126	Pass		Pyrus pyrifolia	Yokogoshi	Japan	Group 4	2x	1
PI 292372	a550887-4349125-010319-488_K02	CPYR_421.003	8.80568	Pass		Pyrus communis	Novogodnaia	Ukraine	Communis	2x	1
PI 654946	a550887-4349125-010319-488_K03	CPYR_2758.001	25.3969	Pass		Pyrus pyrifolia	Shoghori II	Pakistan	Group 4	2x	1
PI 541392	a550887-4349125-010319-488_K04	CPYR_1249.001	16.6066	Pass		Pyrus communis subsp. pyraster	P. communis ssp. pyraster Olez 4 - Turkey	Turkey	Communis	2x	1	Seedling selection B from seed collected in Turkey
PI 654960	a550887-4349125-010319-488_K05	CPYR_2786.001	15.1899	Pass		Pyrus ×bretschneideri	Syan Li	China	Group 4	2x	1	Recived from Kazakhstan, where they are used as pear rootstocks. Originated in China.
PI 541418	a550887-4349125-010319-488_K06	CPYR_1354.001	24.9933	Pass		Pyrus communis	OHxF 112	United States-Oregon	Communis	2x	1	Old Home x Bartlett
PI 542035	a550887-4349125-010319-488_K07	CPYR_1708.003		Fail	QC CR	Pyrus ×canescens	P. x canescens 1213 - Uzbekistan	Uzbekistan	Group 2	2x	1
PI 541783	a550887-4349125-010319-488_K08	CPYR_1353.001	13.0866	Pass		Pyrus hybrid	P. betulifolia x P. calleryana-5	United States	Hybrids	2x	1	P. betulaefolia-2 x P. calleryana-5 seedling selection
PI 665788	a550887-4349125-010319-488_K09	CPYR_2646.003		Fail	QC CR	Pyrus ×bretschneideri	Zao Su Li	China	Group 4	2x	1
PI 540994	a550887-4349125-010319-488_K10	CPYR_1485.001	6.50337	Pass		Pyrus betulifolia	P. betulifolia-2 x P. betulifolia-1	United States	Group 3	2x	1	P. betulifolia-2 x P. betulifolia-1 seedling selection B
PI 541593	a550887-4349125-010319-488_K11	CPYR_829.001	14.4417	Pass		Pyrus cossonii	P. cossonii No. 1 - Russia	United States	Group 1	2x	1	Seedling selection from seedlot collected in the USSR
PI 541166	a550887-4349125-010319-488_K12	CPYR_144.001	27.8057	Pass		Pyrus communis	Columbia	United States-New York	Communis	2x	1	Chance seedling
PI 541977	a550887-4349125-010319-488_K13	CPYR_916.001	7.89625	Pass		Pyrus syriaca	P. syriaca No. 2 - Israel	Israel	Group 2	2x	1	Seedling selection from seed collected wild from Israel
PI 654956	a550887-4349125-010319-488_K14	CPYR_2778.001	34.5823	Pass		Pyrus hybrid	Domestic pear hybrid from Orel, Russia	Russia	Hybrids	2x	1
PI 657917	a550887-4349125-010319-488_K15	CPYR_2790.002	12.3565	Pass		Pyrus syriaca	P. syriaca ARM-01-361 - Armenia	Armenia	Group 2	2x	1
PI 654962	a550887-4349125-010319-488_K16	CPYR_2851.001	26.3091	Pass		Pyrus communis	SIM 117-7 (Alberta, Canada)	Canada-Alberta	Communis	2x	1
PI 542035	a550887-4349125-010319-488_K17	CPYR_1708.005	19.1962	Pass		Pyrus ×canescens	P. x canescens 1213 - Uzbekistan	Uzbekistan	Group 2	2x	1	Open-pollinated from botanical collection
PI 541922	a550887-4349125-010319-488_K18	CPYR_1290.001	12.1015	Pass		Pyrus pyrifolia	P. pyrifolia Donovan	United States	Group 4	2x	1
PI 437067	a550887-4349125-010319-488_K19	CPYR_901.001	29.2028	Pass		Pyrus communis	B-12	South Africa	Communis	2x	1	Selection
PI 358954	a550887-4349125-010319-488_K20	CPYR_887.001	9.39563	Pass		Pyrus pyrifolia	HN-39 P. pyrifolia (Virus Indicator)	Japan	Group 4	2x	1	Seedling of cultivar Nijusseiki
PI 133540	a550887-4349125-010319-488_K21	CPYR_1077.003	14.2763	Pass		Pyrus ussuriensis	China	Australia	Group 4	2x	1
PI 665807	a550887-4349125-010319-488_K22	CPYR_2748.001	11.3574	Pass		Pyrus hybrid	India NIC 20814	India	Hybrids	2x	1
PI 541318	a550887-4349125-010319-488_K23	CPYR_701.001	22.9166	Pass		Pyrus communis	LA-62 (Virus Indicator)	United Kingdom	Communis	2x	1
PI 542015	a550887-4349125-010319-488_K24	CPYR_1260.001	10.3891	Pass		Pyrus ussuriensis	P. ussuriensis MA 1919-23	United States	Group 4	2x	1	Seedling selection from seedlot collected wild in China
PI 541691	a550887-4349125-010319-488_L02	CPYR_1217.002	23.3398	Pass		Pyrus hondoensis	P. hondoensis 23A x P. hondoensis OP seedling	United States	Group 4	2x	1	P. hondo!nsis 23A x hondoensis W-6
PI 324135	a550887-4349125-010319-488_L04	CPYR_457.002	24.9919	Pass		Pyrus communis	Porporata	Italy	Communis	2x	1	Butirra Hardy x President Roosevelt
PI 541369	a550887-4349125-010319-488_L05	CPYR_709.001	24.4342	Pass		Pyrus communis	OHxF 51	United States-Oregon	Communis	2x	1	Old Home x Bartlett
PI 541680	a550887-4349125-010319-488_L07	CPYR_1236.001	32.4958	Pass		Pyrus hondoensis	P. hondoensis 117-28B x P. hondoensis OP seedling	United States	Group 4	2x	1	P. hondoensis 117-28B x P. hondoensis W-6
PI 541775	a550887-4349125-010319-488_L08	CPYR_1305.001	17.2919	Pass		Pyrus hybrid	P. betulifolia x P. pyrifolia	United States	Hybrids	2x	1	P. betulaefolia x P. pyrifolia seedling A
PI 654938	a550887-4349125-010319-488_L10	CPYR_2719.001	12.1842	Pass		Pyrus pyrifolia	Nepal 5137	Nepal	Group 4	2x	1
PI 541064	a550887-4349125-010319-488_L12	CPYR_1303.001	7.79816	Pass		Pyrus calleryana	P. calleryana	United States	Group 3	2x	1
PI 541974	a550887-4349125-010319-488_L13	CPYR_907.001	7.83459	Pass		Pyrus syriaca	P. syriaca - Israel	Israel	Group 2	2x	1	Seedling selection from seed collected in Israel
PI 541368	a550887-4349125-010319-488_L14	CPYR_1422.001	26.1943	Pass		Pyrus communis	OPR-013 OHxF C-34	United States	Communis	2x	1	Old Home x Farmingdale
PI 541796	a550887-4349125-010319-488_L16	CPYR_1455.001		Fail	QC CR	Pyrus hybrid	P. hybrid	United States	Hybrids	2x	1
PI 540966	a550887-4349125-010319-488_L17	CPYR_1237.001	6.34643	Pass		Pyrus betulifolia	P. betulifolia OSU-1	United States	Group 3	2x	1	Seedling selection A of P. betulifolia OSU-1
PI 688091	a550887-4349125-010319-488_L18	CPYR_2723.001		Fail	QC CR	Pyrus ×sinkiangensis	Ho Mon	China	Group 4	2x	1
PI 541730	a550887-4349125-010319-488_L19	CPYR_679.001	14.1782	Pass		Pyrus hybrid	P. calleryana x P. fauriei	United States	Hybrids	2x	1
PI 502180	a550887-4349125-010319-488_L23	CPYR_1640.001	24.4272	Pass		Pyrus communis	P. communis - Macedonia	Macedonia	Communis	2x	1	Collected from the wild in Yugoslavia
PI 654949	a550887-4349125-010319-488_M01	CPYR_2765.001	24.7187	Pass		Pyrus ×sinkiangensis	Lantai Jululi	China	Group 4	2x	1
PI 693213	a550887-4349125-010319-488_M02	CPYR_3006.001	25.2386	Pass		Pyrus communis	Fowler Pear	United States-Washington	Communis	2x	1
PI 540923	a550887-4349125-010319-488_M03	CPYR_641.001	12.8274	Pass		Pyrus spinosa	P. spinosa (amygdaliformis) - Greece (hybrid?)	Greece	Group 2	2x	1	Seedling selection from seed collected in Greece
PI 542011	a550887-4349125-010319-488_M04	CPYR_1.005	12.7545	Pass		Pyrus ussuriensis	P. ussuriensis K-30 (hybrid) - Korea	Korea-South	Group 4	2x	1
PI 541542	a550887-4349125-010319-488_M05	CPYR_2268.002	22.8564	Pass		Pyrus communis	Laxton's Foremost	United Kingdom	Communis	2x	1	Marechal du Cour x Fertility
PI 691237	a550887-4349125-010319-488_M06	CPYR_2982.001	32.7144	Pass		Pyrus sp.	Marut	Turkmenistan	Hybrids	2x	1
PI 657932	a550887-4349125-010319-488_M07	CPYR_2935.006	16.2886	Pass		Pyrus salicifolia	P. salicifolia - AZN-91 Azerbaijan	Azerbaijan	Group 2	2x	1	Collected from the wild in Azerbaijan.
PI 617572	a550887-4349125-010319-488_M08	CPYR_2455.001	26.2489	Pass		Pyrus communis	Miney	Canada-Ontario	Communis	2x	1	Zuckerbirne x Clapp Favorite
PI 541410	a550887-4349125-010319-488_M09	CPYR_1338.001	27.9823	Pass		Pyrus communis	OHxF 5	United States-Oregon	Communis	2x	1	Old Home x Bartlett
PI 654950	a550887-4349125-010319-488_M10	CPYR_2768.001	26.1704	Pass		Pyrus hybrid	B II-3-25-27 (Bartlett x P. salicifolia) - Russia	Russian Federation	Hybrids	2x	1
PI 312144	a550887-4349125-010319-488_M11	CPYR_859.001		Fail	QC CR	Pyrus nivalis	P. nivalis	Netherlands	Group 1	2x	1
PI 540979	a550887-4349125-010319-488_M12	CPYR_1312.003	6.757	Pass		Pyrus betulifolia	P. betulifolia	United States	Group 3	2x	1	Seedling selection from seed collected from North China
PI 279936	a550887-4349125-010319-488_M13	CPYR_504.001	23.4673	Pass		Pyrus communis	RX 196	France	Communis	2x	1	Clairgeau x Williams
PI 133760	a550887-4349125-010319-488_M14	CPYR_1132.003	29.6764	Pass		Pyrus communis	Passans du Portugal	Portugal	Communis	2x	1
PI 641285	a550887-4349125-010319-488_M15	CPYR_2799.001	13.3052	Pass		Pyrus communis subsp. caucasica	P. communis ssp. caucasica ARM-02-167 - Armenia, Vanadzor	Armenia	Communis	2x	1	Collected from the wild in Armenia.
PI 541726	a550887-4349125-010319-488_M16	CPYR_1135.001	34.0386	Pass		Pyrus hybrid	Pontotoc	United States-Mississippi	Hybrids	2x	1
PI 617642	a550887-4349125-010319-488_M17	CPYR_2573.001	30.7106	Pass		Pyrus hybrid	Turnbull (Turnbull Giant)	United States	Hybrids	2x	1
PI 292376	a550887-4349125-010319-488_M18	CPYR_307.001	24.1035	Pass		Pyrus communis	Jubileinaia	Russian Federation	Communis	2x	1
PI 307541	a550887-4349125-010319-488_M19	CPYR_301.002	25.4684	Pass		Pyrus communis	Jalovcovka	Poland	Communis	2x	1
PI 144311	a550887-4349125-010319-488_M20	CPYR_1108.001	22.4234	Pass		Pyrus communis	Latvian A	United States	Communis	2x	1
PI 688139	a550887-4349125-010319-488_M21	CPYR_2380.001	21.0487	Pass		Pyrus communis	Rubiyat	United States	Communis	2x	1
PI 541813	a550887-4349125-010319-488_M22	CPYR_2034.001	10.4802	Pass		Pyrus ussuriensis	Shi Hua Li seedling	United States	Group 4	2x	1	Seedling selection from OP seed of cultivar Shi-Hua-Li
PI 542014	a550887-4349125-010319-488_M23	CPYR_1203.001	7.31331	Pass		Pyrus ussuriensis	P. ussuriensis No. 3 - Korea	United States	Group 4	2x	1	Seedling selection from seedlot collected in Korea
PI 617653	a550887-4349125-010319-488_M24	CPYR_2594.001	24.8392	Pass		Pyrus pyrifolia	Zao Su	China	Group 4	2x	1
PI 641273	a550887-4349125-010319-488_N01	CPYR_1591.001	20.0832	Pass		Pyrus pyrifolia	P. pyrifolia (hybrid)	United States	Group 4	2x	1	Seedling selection from seed collected in Iran
PI 541663	a550887-4349125-010319-488_N03	CPYR_789.001	4.75737	Pass		Pyrus gharbiana	P. gharbiana	Morocco	Group 1	2x	1	Seedling selection from seed collected in Morocco
PI 300693	a550887-4349125-010319-488_N05	CPYR_38.001_09	30.5382	Pass		Pyrus communis	Bartlett	United Kingdom	Communis	2x	1
PI 337438	a550887-4349125-010319-488_N06	CPYR_688.001	21.5027	Pass		Pyrus communis subsp. caucasica	P. communis ssp. caucasica - Stavropol	Russian Federation	Communis	2x	1	Collected from the wild in Russia
PI 654947	a550887-4349125-010319-488_N07	CPYR_2761.001	12.4126	Pass		Pyrus sp.	P. salicifolia N65 - Russia	Russian Federation	Hybrids	2x	1
PI 541950	a550887-4349125-010319-488_N08	CPYR_869.001	13.9498	Pass		Pyrus salicifolia	P. salicifolia MA 884-36 [P. orientalis]	United States	Group 2	2x	1	Seedling selection from OP seed from botanical collection
PI 392319	a550887-4349125-010319-488_N09	CPYR_205.002	22.3743	Pass		Pyrus communis	Ecmianka	Bulgaria	Communis	2x	1	Parentage unknown.
PI 541959	a550887-4349125-010319-488_N10	CPYR_1276.001	10.9511	Pass		Pyrus calleryana	P. calleryana MA182-53	United States	Group 3	2x	1	Uncertain, perhaps originally collected wild
PI 688140	a550887-4349125-010319-488_N11	CPYR_2656.003	32.5253	Pass		Pyrus pyrifolia	Kusuk	Pakistan	Group 4	2x	1
PI 541423	a550887-4349125-010319-488_N12	CPYR_1363.001	24.1582	Pass		Pyrus communis	OHxF 259	United States-Oregon	Communis	2x	1	Old Home x Bartlett
PI 617507	a550887-4349125-010319-488_N13	CPYR_776.001	9.2639	Pass		Pyrus fauriei	P. fauriei MSU5768	Korea-South	Group 3	2x	1	Seedling selection from seedlot collected in Korea
PI 541109	a550887-4349125-010319-488_N14	CPYR_2190.001	8.7132	Pass		Pyrus calleryana	Avery Park (P. calleryana) - upright	United States-Oregon	Group 3	2x	1	P. calleryana seedling selection
PI 231889	a550887-4349125-010319-488_N15	CPYR_230.001	25.3773	Pass		Pyrus communis	Fondante de Charneu	Belgium	Communis	2x	1	Chance seedling
PI 420995	a550887-4349125-010319-488_N16	CPYR_664.001		Fail	dQC	Pyrus calleryana	Whitehouse (P. calleryana)	United States	Group 3	2x	1
PI 541456	a550887-4349125-010319-488_N17	CPYR_431.001	26.1228	Pass		Pyrus communis	Old Home	United States-Illinois	Communis	2x	1
PI 541104	a550887-4349125-010319-488_N18	CPYR_2185.001	8.58288	Pass		Pyrus calleryana	Redspire (P. calleryana)	United States	Group 3	2x	1	Seedling selection from cultivar Bradford
PI 506369	a550887-4349125-010319-488_N19	CPYR_1581.001	14.2581	Pass		Pyrus hondoensis	P. hondoensis - Iwate No. 4	Japan	Group 4	2x	1
PI 541107	a550887-4349125-010319-488_N20	CPYR_2188.001		Fail	dQC	Pyrus calleryana	Grant St. Yellow (P. calleryana)	United States-Oregon	Group 3	2x	1
PI 541421	a550887-4349125-010319-488_N21	CPYR_1361.001	26.0443	Pass		Pyrus communis	OHxF 9	United States-Oregon	Communis	2x	1	Old Home x Bartlett
PI 541720	a550887-4349125-010319-488_N22	CPYR_395.002	32.5883	Pass		Pyrus hybrid	Missouri No. 83	United States	Hybrids	2x	1
PI 617668	a550887-4349125-010319-488_N23	CPYR_2613.001		Fail	QC CR	Pyrus hybrid	Emancipation	United States-Texas	Hybrids	2x	1
PI 541923	a550887-4349125-010319-488_N24	CPYR_1297.001	12.5107	Pass		Pyrus pyrifolia	P. pyrifolia Donovan	United States	Group 4	2x	1	Seedling selection
PI 541633	a550887-4349125-010319-488_O01	CPYR_779.001		Fail	QC CR	Pyrus fauriei	P. fauriei No. 4	Korea-South	Group 3	2x	1
PI 654944	a550887-4349125-010319-488_O02	CPYR_2756.001	14.8508	Pass		Pyrus pyrifolia	Fu-Wu-Shian	China	Group 4	2x	1
PI 541371	a550887-4349125-010319-488_O03	CPYR_732.001	26.1676	Pass		Pyrus communis	OHxF 217	United States-Oregon	Communis	2x	1	Old Home x Bartlett
PI 641288	a550887-4349125-010319-488_O04	CPYR_2808.001	26.0303	Pass		Pyrus hybrid	Louisiana Beauty	United States-Louisiana	Hybrids	2x	1
PI 349021	a550887-4349125-010319-488_O05	CPYR_638.001	12.0707	Pass		Pyrus spinosa	P. spinosa (amygdaliformis) - Macedonia	Macedonia	Group 2	2x	1	Seedling selection from seedlot collected in Yugoslavia
-	a550887-4349125-010319-488_O06	NJ487601193	14.6981	Pass		Pyrus communis	NJ487601193	United States	Communis	2x	1
PI 689459	a550887-4349125-010319-488_O07	CIGC_9.001	17.9939	Pass		×Pyronia	Pyronia veitchii	United Kingdom-England	Outgroup	2x	1
PI 541106	a550887-4349125-010319-488_O09	CPYR_2187.001		Fail	dQC	Pyrus calleryana	C.P. 6-48	United States	Group 3	2x	1
PI 66131	a550887-4349125-010319-488_O11	CPYR_598.001	25.9714	Pass		Pyrus hybrid	Waite (Canner)	United States	Hybrids	2x	1	Kieffer x unknown European type
PI 693214	a550887-4349125-010319-488_O12	CPYR_3014.001	26.403	Pass		Pyrus communis	Loreli's Favorite	United States-Oregon	Communis	2x	1
PI 617629	a550887-4349125-010319-488_O13	CPYR_2558.001	34.9285	Pass		Pyrus hybrid	John	Canada-Saskatchewan	Hybrids	2x	1	Pyrus ussuriensis x Aspa
PI 541429	a550887-4349125-010319-488_O14	CPYR_1374.004	22.265	Pass		Pyrus communis subsp. pyraster	P-61 fire blight resistant rootstock	United States-Oregon	Communis	2x	1	Seedling selection
PI 132094	a550887-4349125-010319-488_O15	CPYR_1288.001	17.8524	Pass		Pyrus communis subsp. pyraster	P. communis ssp. pyraster - Iran	Iran	Communis	2x	1
PI 541673	a550887-4349125-010319-488_O21	CPYR_797.003	7.4114	Pass		Pyrus hondoensis	P. hondoensis	NA	Group 4	2x	1
PI 665754	a550887-4349125-010319-488_O22	CPYR_2951.001	28.0201	Pass		Pyrus communis	Gldani Pear G10-120	Georgia	Communis	2x	1
PI 541294	a550887-4349125-010319-488_O24	CPYR_715.002	23.5472	Pass		Pyrus communis	P-12 fire blight resistant rootstock	United States-Oregon	Communis	2x	1	Seedling selection
PI 313930	a550887-4349125-010319-488_P01	CPYR_736.001	19.4835	Pass		Pyrus ×complexa	P. complexa [x complexa]	Russian Federation	Hybrids	2x	1	Collected from the wild in the USSR
PI 541734	a550887-4349125-010319-488_P02	CPYR_762.001		Fail	QC CR	Pyrus hybrid	P. dimorphophylla x P. fauriei	United States	Hybrids	2x	1
PI 665793	a550887-4349125-010319-488_P03	CPYR_2660.002	29.2533	Pass		Pyrus hybrid	Spin Tangoo (white pear)	Pakistan	Hybrids	2x	1
PI 313938	a550887-4349125-010319-488_P04	CPYR_931.001	15.955	Pass		Pyrus ussuriensis	P. ussuriensis (hybrid?)	Russian Federation	Group 4	2x	1	Collected from the wild in the Soviet Union
PI 542017	a550887-4349125-010319-488_P05	CPYR_1293.002	6.92656	Pass		Pyrus ussuriensis	P. ussuriensis 2497-22 - China	China	Group 4	2x	1	Seedling selection from seedlot collected wild in China
PI 541576	a550887-4349125-010319-488_P06	CPYR_744.001	9.61983	Pass		Pyrus cordata	P. cordata - Turkey	Turkey	Group 1	2x	1	Seedling selection from seedlot collected in Turkey
PI 483384	a550887-4349125-010319-488_P07	CPYR_1538.001	19.0981	Pass		Pyrus communis subsp. pyraster	P. communis ssp. pyraster - Poland	Poland	Communis	2x	1	Chance seedling
PI 541412	a550887-4349125-010319-488_P09	CPYR_1340.001	25.7066	Pass		Pyrus communis	OHxF 34	United States-Oregon	Communis	2x	1	Old Home x Bartlett
PI 638018	a550887-4349125-010319-488_P10	CPYR_2828.006	5.97088	Pass		Pyrus betulifolia	P. betulifolia 'Du Li' - Shaanxi, China	China	Group 3	2x	1	Collected in the wild from Shaanxi Province, China.
PI 665801	a550887-4349125-010319-488_P11	CPYR_2740.001		Fail	QC CR	Pyrus communis	N 217-27.12 (rootstock selection)	Russia	Communis	2x	1
PI 541972	a550887-4349125-010319-488_P12	CPYR_2290.001	32.0965	Pass		Pyrus hybrid	B-27	South Africa	Hybrids	2x	1	Rootstock selection
Q 25266	a550887-4349125-010319-488_P13	CPYR_2643.003	13.1861	Pass		Pyrus pyrifolia	Nepal 5074	Nepal	Group 4	2x	1
PI 541994	a550887-4349125-010319-488_P14	CPYR_355.001	17.1195	Pass		Pyrus ussuriensis	Lao Suan Li [Lo Suan Li]	China	Group 4	2x	1	old cultivar from northeast China
PI 136621	a550887-4349125-010319-488_P15	CPYR_1068.002	25.3465	Pass		Pyrus communis	Beurré d'Avril	France	Communis	2x	1	Chance seedling
PI 688095	a550887-4349125-010319-488_P16	CPYR_2936.001	31.3061	Pass		Pyrus ussuriensis	Changpa Li	China	Group 4	2x	1
PI 337441	a550887-4349125-010319-488_P17	CPYR_690.001	13.4411	Pass		Pyrus communis subsp. caucasica	P. communis ssp. caucasica - Stavropol	Russian Federation	Communis	2x	1	Collected from the wild in Russia
PI 324042	a550887-4349125-010319-488_P18	CPYR_1195.001	13.06	Pass		Pyrus communis subsp. caucasica	P. communis ssp. caucasica - Caucasus Mts.	Russian Federation	Communis	2x	1	Seedling selection from seedlot collected in Russia
PI 295094	a550887-4349125-010319-488_P19	CPYR_495.001	22.2216	Pass		Pyrus communis	Rotkottig Frau Ostergotland	Sweden	Communis	2x	1
PI 617517	a550887-4349125-010319-488_P20	CPYR_1291.001	11.9642	Pass		Pyrus pyrifolia	P. pyrifolia seedling W-6 Wilson	United States	Group 4	2x	1	Seedling selection from OP seed collected in Arboretum
PI 541728	a550887-4349125-010319-488_P21	CPYR_415.001	35.8982	Pass		Pyrus hybrid	Nijisseiki x Old Home (Decline susceptible)	United States	Hybrids	2x	1	Nijisseiki x Old home decline susceptible
PI 541971	a550887-4349125-010319-488_P22	CPYR_2289.001	30.272	Pass		Pyrus hybrid	BP-3 (B-14)	South Africa	Hybrids	2x	1	Seedling selection from seed collected wild in S. Africa
PI 665796	a550887-4349125-010319-488_P23	CPYR_2852.001	35.5506	Pass		Pyrus pyrifolia	Tse Li type from Li-Shiu	China	Group 4	2x	1
PI 540949	a550887-4349125-010319-488_P24	CPYR_652.001	8.73842	Pass		Pyrus betulifolia	P. betulifolia 3	United States	Group 3	2x	1	Seedling selection from seedlot collected wild in China
PI 127039	a550887-4349125-010319-489_A01	CPYR_1109.003	22.3169	Pass		Pyrus communis	Laxton's Progress	United Kingdom	Communis	2x	1	Marie Louise x Bartlett
PI 541073	a550887-4349125-010319-489_A02	CPYR_1437.001		Fail	QC CR	Pyrus calleryana	P. calleryana [C-44?]	United States	Group 3	2x	1
PI 267940	a550887-4349125-010319-489_A03	CPYR_1347.001	30.52	Pass		Pyrus communis	Bartlett - Swiss compatible with Quince	United Kingdom	Communis	2x	1	Chance seedling
PI 541524	a550887-4349125-010319-489_A04	CPYR_2437.001	24.8602	Pass		Pyrus communis	Delbard Premiere	France	Communis	2x	1	Akca x Dr. Jules Guyot
PI 541516	a550887-4349125-010319-489_A05	CPYR_2124.002	26.4913	Pass		Pyrus communis	Doree de Bourgogne	NA	Communis	2x	1
PI 392322	a550887-4349125-010319-489_A06	CPYR_469.003	22.7485	Pass		Pyrus communis	Progres	Bulgaria	Communis	2x	1	Beurre Giffard x Green Magdelene
PI 541361	a550887-4349125-010319-489_A09	CPYR_141.002	24.1638	Pass		Pyrus communis	Colonel Marchand	France	Communis	2x	1
PI 654914	a550887-4349125-010319-489_A10	CPYR_2438.001	26.2531	Pass		Pyrus communis	Romania 14/125 F2-3-131	Romania	Communis	2x	1
PI 617666	a550887-4349125-010319-489_A11	CPYR_2611.001	25.8173	Pass		Pyrus hybrid	Florida 58-45	United States-Florida	Hybrids	2x	1
PI 641283	a550887-4349125-010319-489_A12	CPYR_2738.001	34.445	Pass		Pyrus communis	Philip	Canada-Saskatchewan	Communis	2x	1	Pyrus ussuriensis x Aspa
PI 541465	a550887-4349125-010319-489_A13	CPYR_1700.002	20.299	Pass		Pyrus communis	Perazola	Italy	Communis	2x	1
PI 541217	a550887-4349125-010319-489_A14	CPYR_354.001	26.0681	Pass		Pyrus communis	Lincoln	United States-Illinois	Communis	2x	1	Chance seedling
PI 541373	a550887-4349125-010319-489_A15	CPYR_734.001	24.2184	Pass		Pyrus communis	OHxF 288	United States-Oregon	Communis	2x	1	Old Home x Bartlett
PI 541089	a550887-4349125-010319-489_A16	CPYR_2086.001	7.17459	Pass		Pyrus calleryana	OPR-156 P. calleryana	United States	Group 3	2x	1
PI 617549	a550887-4349125-010319-489_A17	CPYR_2363.001	27.4526	Pass		Pyrus communis	Morgan	United States-Tennessee	Communis	2x	1	Bartlett x Late Faulkner
PI 665784	a550887-4349125-010319-489_A18	CPYR_2854.001	36.4937	Pass		Pyrus ×bretschneideri	Shian-Sui Li	China	Group 4	2x	1
PI 617599	a550887-4349125-010319-489_A19	CPYR_2523.001	34.9018	Pass		Pyrus hybrid	Charles Harris	United States	Hybrids	2x	1
PI 255615	a550887-4349125-010319-489_A20	CPYR_383.004	24.8518	Pass		Pyrus communis	Mariette de Millepieds	France	Communis	2x	1
PI 541448	a550887-4349125-010319-489_A21	CPYR_1582.001	29.6232	Pass		Pyrus communis	Warren	United States	Communis	2x	1
PI 282978	a550887-4349125-010319-489_A22	CPYR_537.001	23.2964	Pass		Pyrus communis	Solanka	Czech Republic	Communis	2x	1
PI 665751	a550887-4349125-010319-489_A23	CPYR_2942.001	29.0375	Pass		Pyrus hybrid	Southern King	United States-Texas	Hybrids	2x	1
PI 541092	a550887-4349125-010319-489_A24	CPYR_2089.001		Fail	QC CR	Pyrus calleryana	OPR-187 P. calleryana	United States-Oregon	Group 3	2x	1
PI 617602	a550887-4349125-010319-489_B01	CPYR_2526.001	28.1967	Pass		Pyrus hybrid	Biscamp	United States	Hybrids	2x	1
PI 691234	a550887-4349125-010319-489_B03	CPYR_2873.001	22.4108	Pass		Pyrus communis	Diana	Czech Republic	Communis	2x	1
PI 541063	a550887-4349125-010319-489_B04	CPYR_1302.001		Fail	QC CR	Pyrus calleryana	P. calleryana	United States	Group 3	2x	1
PI 541967	a550887-4349125-010319-489_B05	CPYR_2275.001	23.941	Pass		Pyrus communis	Romania 138-31-38	Romania	Communis	2x	1	Cultivar selection
PI 617504	a550887-4349125-010319-489_B06	CPYR_482.002	26.0583	Pass		Pyrus communis	Reimer Red	United States-Oregon	Communis	2x	1
PI 130991	a550887-4349125-010319-489_B07	CPYR_1133.001	27.4554	Pass		Pyrus communis	Petersbirne	Germany	Communis	2x	1
PI 541507	a550887-4349125-010319-489_B08	CPYR_2113.002	23.9129	Pass		Pyrus communis	Idaho	United States-Idaho	Communis	2x	1
PI 541446	a550887-4349125-010319-489_B09	CPYR_1116.001	20.9618	Pass		Pyrus communis	Marks	United States-New York	Communis	2x	1	Seedling selection from seedlot received from Marks in NY
PI 541393	a550887-4349125-010319-489_B10	CPYR_1250.001	24.1526	Pass		Pyrus communis subsp. pyraster	P. communis ssp. pyraster Olez 5 - Turkey	Turkey	Communis	2x	1	Seedling selection from seed collected in Turkey Crown Gall Resistant selection, M.N. Westwood
PI 483378	a550887-4349125-010319-489_B11	CPYR_1532.002	23.04	Pass		Pyrus communis	Wilenska Plenna	Poland	Communis	2x	1
Q 25268	a550887-4349125-010319-489_B12	CPYR_2645.002	12.4448	Pass		Pyrus pyrifolia	Nepal 5079	Nepal	Group 4	2x	1
PI 483369	a550887-4349125-010319-489_B13	CPYR_1523.006	24.5884	Pass		Pyrus communis	Bojka	Poland	Communis	2x	1
PI 617681	a550887-4349125-010319-489_B14	CPYR_2707.001	25.8187	Pass		Pyrus communis subsp. pyraster	Fox 11 (P. communis rootstock clone)	Italy	Communis	2x	1	Pyrus communis 'Mora' x 'Volpina' (open pollinated) Cross made in 1979
PI 541710	a550887-4349125-010319-489_B15	CPYR_217.004	28.362	Pass		Pyrus hybrid	Eureka	United States-Illinois	Hybrids	2x	1	Seckel x Kieffer
PI 617513	a550887-4349125-010319-489_B16	CPYR_1218.001		Fail	QC CR	Pyrus calleryana	P. calleryana PC-5 (non-typical)	United States	Group 3	2x	1
PI 541268	a550887-4349125-010319-489_B17	CPYR_550.002	26.9411	Pass		Pyrus communis	Success de la Meilleraye	France	Communis	2x	1
PI 688151	a550887-4349125-010319-489_B18	CPYR_2950.001	30.5172	Pass		Pyrus communis	Mission San Carlos Pear 3	United States	Communis	2x	1
PI 617622	a550887-4349125-010319-489_B19	CPYR_2550.001	27.8085	Pass		Pyrus communis	Anjou - Pine Grove Mutant	United States-Oregon	Communis	2x	1
PI 541812	a550887-4349125-010319-489_B20	CPYR_1702.001	30.8269	Pass		Pyrus hybrid	South Dakota E-31	United States-South Dakota	Hybrids	2x	1	Uncertain, probably a hybrid
PI 541257	a550887-4349125-010319-489_B21	CPYR_502.003	25.0984	Pass		Pyrus communis	Royale Vendee	France	Communis	2x	1	Seedling selection
PI 617527	a550887-4349125-010319-489_B22	CPYR_2204.004	14.9825	Pass		Pyrus communis	Jiugnos	Italy	Communis	2x	1	Old Italian Cultivar
PI 541265	a550887-4349125-010319-489_B23	CPYR_545.003	30.5228	Pass		Pyrus communis	Stark Jumbo (Johnson cultivar)	United States	Communis	2x	1	Bartlett bud mutation
PI 637985	a550887-4349125-010319-489_B24	CPYR_2375.003	26.3918	Pass		Pyrus communis	Autumn Red	United States	Communis	2x	1	Random seedling selection from cultivar lot
PI 688153	a550887-4349125-010319-489_C01	CPYR_2378.001	25.7024	Pass		Pyrus communis	Red Silk	United States	Communis	2x	1	Probably - Max Red Bartlett x Forelle
PI 430890	a550887-4349125-010319-489_C02	CPYR_1402.001	23.5584	Pass		Pyrus communis	Domestic pear - Ontario Selection	Canada	Communis	2x	1
PI 665813	a550887-4349125-010319-489_C03	CPYR_2945.001	22.8592	Pass		Pyrus communis	Jaunette	France	Communis	2x	1
PI 617628	a550887-4349125-010319-489_C04	CPYR_2557.001	30.9166	Pass		Pyrus hybrid	Fedorovski	NA	Hybrids	2x	1
PI 541025	a550887-4349125-010319-489_C05	CPYR_667.001		Fail	QC CR	Pyrus calleryana	OPR-268 P. calleryana	United States-Oregon	Group 3	2x	1
PI 312147	a550887-4349125-010319-489_C06	CPYR_1576.001	26.0107	Pass		Pyrus communis	P. hybrid - Alma-ata (rec. as P. communis)	Kazakhstan	Communis	2x	1	Collected from the wild in the Soviet Union
PI 617512	a550887-4349125-010319-489_C08	CPYR_923.001	15.5655	Pass		Pyrus hybrid	P. pyrifolia hybrid (complex hybrid with P. ussuriensis)	United States	Hybrids	2x	1	Seedling selection from seedlot collected in Asia
PI 322707	a550887-4349125-010319-489_C09	CPYR_646.001	3.61111	Pass		Pyrus betulifolia	P. betulifolia - Ukraine	Ukraine	Group 3	2x	1	Possibly originally collected wild
CPYR 2915	a550887-4349125-010319-489_C10	CPYR_2915.001	26.7968	Pass		Pyrus communis	G.45.11	NA	Communis	2x	1
PI 279333	a550887-4349125-010319-489_C11	CPYR_171.002	28.1757	Pass		Pyrus communis	Urbaniste	Belgium	Communis	2x	1	Chance seedling
PI 540967	a550887-4349125-010319-489_C12	CPYR_1238.001	6.78363	Pass		Pyrus betulifolia	P. betulifolia OSU-1	United States	Group 3	2x	1	Seedling selection from P. betulifolia OSU-1
PI 541018	a550887-4349125-010319-489_C13	CPYR_673.001		Fail	QC CR	Pyrus calleryana	P. calleryana PC-5	NA	Group 3	2x	1
PI 277525	a550887-4349125-010319-489_C14	CPYR_260.001	22.6798	Pass		Pyrus communis	Guenette (=Green Chisel)	NA	Communis	2x	1
PI 483403	a550887-4349125-010319-489_C15	CPYR_1553.001	25.8467	Pass		Pyrus communis subsp. pyraster	Aniversarea	Romania	Communis	2x	1
PI 541053	a550887-4349125-010319-489_C16	CPYR_1264.003		Fail	QC CR	Pyrus calleryana	P. calleryana OSU-2	United States	Group 3	2x	1
PI 541353	a550887-4349125-010319-489_C17	CPYR_1150.001	26.9523	Pass		Pyrus communis	Sugar Top	United States	Communis	2x	1
PI 688089	a550887-4349125-010319-489_C18	CPYR_2760.001	27.8744	Pass		Pyrus salicifolia	P. salicifolia N1 - Russia	Russian Federation	Group 2	2x	1
PI 617643	a550887-4349125-010319-489_C19	CPYR_2574.001	38.2663	Pass		Pyrus hybrid	Tarusa Crimson (=Tamared)	United States	Hybrids	2x	1
PI 541711	a550887-4349125-010319-489_C20	CPYR_239.002	35.3334	Pass		Pyrus hybrid	Garber	United States-Pennsylvania	Hybrids	2x	1	P. pyrifolia hybrid
PI 542002	a550887-4349125-010319-489_C21	CPYR_562.003	16.9332	Pass		Pyrus ussuriensis	Da Tou Huang [Ta Tau Huang]	China	Group 4	2x	1	selection from Liaoning Province
PI 617661	a550887-4349125-010319-489_C22	CPYR_2606.001	20.5429	Pass		Pyrus hybrid	Thanksgiving	Georgia	Hybrids	2x	1
PI 279937	a550887-4349125-010319-489_C23	CPYR_505.002	26.099	Pass		Pyrus communis	RX 226	France	Communis	2x	1	Buerre Hardy x Passe Crassane
PI 541798	a550887-4349125-010319-489_C24	CPYR_1478.001	17.4558	Pass		Pyrus hybrid	P. betulifolia x P. pyrifolia	United States	Hybrids	2x	1	P. betulaefolia x P. pyrifolia seedling selection B
PI 541258	a550887-4349125-010319-489_D01	CPYR_503.001	27.8394	Pass		Pyrus communis	Anjou - Russet	United States	Communis	2x	1	Anjou sport
PI 502166	a550887-4349125-010319-489_D02	CPYR_1626.001	22.8157	Pass		Pyrus communis	Saafaranja	Yugoslavia	Communis	2x	1
PI 541209	a550887-4349125-010319-489_D03	CPYR_285.003	22.8101	Pass		Pyrus communis	Hourdequin	France	Communis	2x	1
PI 541961	a550887-4349125-010319-489_D04	CPYR_1620.001	27.199	Pass		Pyrus communis	Unknown Cultivar [Bartlett type but round]	United States	Communis	2x	1	Seedling selection or chance seedling
PI 541206	a550887-4349125-010319-489_D05	CPYR_277.002	25.1853	Pass		Pyrus communis	Henri Desportes	France	Communis	2x	1	Seedling selection
PI 617616	a550887-4349125-010319-489_D06	CPYR_2542.001	17.8005	Pass		Pyrus communis	Moknine No. 4 - Tunisia	Tunisia	Communis	2x	1	Local cultivar from Moknine, Tunisia.
PI 541083	a550887-4349125-010319-489_D07	CPYR_1601.001	7.96071	Pass		Pyrus calleryana	P. calleryana OSU-10	United States	Group 3	2x	1	Seedling selection from seedlot collected in China
PI 617611	a550887-4349125-010319-489_D08	CPYR_2537.001	23.8289	Pass		Pyrus communis	Nadezda (Hope)	Russian Federation	Communis	2x	1
PI 617657	a550887-4349125-010319-489_D09	CPYR_2602.001	26.0569	Pass		Pyrus hybrid	Higdon	United States-Mississippi	Hybrids	2x	1
PI 541455	a550887-4349125-010319-489_D10	CPYR_1062.001	25.0732	Pass		Pyrus communis	Beierschmitt	United States-Iowa	Communis	2x	1
PI 541131	a550887-4349125-010319-489_D11	CPYR_57.001	27.0883	Pass		Pyrus communis	Besi de La Motte	France	Communis	2x	1
PI 541296	a550887-4349125-010319-489_D12	CPYR_722.002	18.4045	Pass		Pyrus communis	P-70 fire blight resistant rootstock	United States-Oregon	Communis	2x	1	Seedling selection
PI 540939	a550887-4349125-010319-489_D13	CPYR_1610.001	11.8002	Pass		Pyrus spinosa	P. spinosa (amygdaliformis) - Turkey	Turkey	Group 2	2x	1	Seedling selection from seedlot WB-9 Collected by Woodridge (WB) in Turkey
PI 617667	a550887-4349125-010319-489_D14	CPYR_2612.001	26.1326	Pass		Pyrus communis	Vaughn	Georgia	Communis	2x	1
PI 654931	a550887-4349125-010319-489_D16	CPYR_2682.002	12.2346	Pass		Pyrus pyrifolia	Waseaka	Japan	Group 4	2x	1
PI 263679	a550887-4349125-010319-489_D17	CPYR_68.002	25.1139	Pass		Pyrus communis	Beurré de Jonghe	Belgium	Communis	2x	1
PI 541162	a550887-4349125-010319-489_D18	CPYR_132.002	23.3861	Pass		Pyrus communis	Chasseurs	Belgium	Communis	2x	1
PI 541126	a550887-4349125-010319-489_D19	CPYR_44.004	22.9895	Pass		Pyrus communis	Belle de Feron	France	Communis	2x	1
PI 688117	a550887-4349125-010319-489_D20	CPYR_2956.001	19.5998	Pass		Pyrus communis	Horner 10	United States-Oregon	Communis	2x	1	O.P. seedling from parent population including OHxF 40, 51,
PI 541708	a550887-4349125-010319-489_D21	CPYR_175.002	29.5139	Pass		Pyrus hybrid	Dixie	Georgia	Hybrids	2x	1	Le Conte x P. pyrifolia
PI 277529	a550887-4349125-010319-489_D22	CPYR_512.004		Fail	QC CR	Pyrus communis	Sanguinole	Germany	Communis	2x	1
PI 688112	a550887-4349125-010319-489_D23	CPYR_2701.001	25.9448	Pass		Pyrus communis	96.FI.13 (P. communis rootstock clone)	France	Communis	2x	1
PI 541515	a550887-4349125-010319-489_D24	CPYR_2123.002	25.6169	Pass		Pyrus communis	Beurré Naghin	Belgium	Communis	2x	1
PI 541546	a550887-4349125-010319-489_E01	CPYR_2272.001	26.7169	Pass		Pyrus communis	Ottawa 291 [O-291]	Canada	Communis	2x	1
PI 280033	a550887-4349125-010319-489_E02	CPYR_238.003	25.6127	Pass		Pyrus communis	Gansel's Bergamot	United Kingdom	Communis	2x	1	Seedling of cultivar Autumn Bergamot
PI 617537	a550887-4349125-010319-489_E03	CPYR_2338.001	16.9303	Pass		Pyrus ussuriensis	Chien Li	China	Group 4	2x	1
PI 293846	a550887-4349125-010319-489_E04	CPYR_1482.001	15.3063	Pass		Pyrus elaeagrifolia	P. elaeagrifolia - Crimea	Ukraine	Group 2	2x	1	Seedling selection from seed collected in Crimea, Ukraine
PI 665811	a550887-4349125-010319-489_E05	CPYR_2806.001	24.189	Pass		Pyrus communis	Green Horse	United Kingdom	Communis	2x	1
PI 264700	a550887-4349125-010319-489_E06	CPYR_595.001	21.3514	Pass		Pyrus communis	Vidovaca	Yugoslavia	Communis	2x	1
PI 282972	a550887-4349125-010319-489_E07	CPYR_311.004	21.9315	Pass		Pyrus communis	Kair Aarmund	Czech Republic	Communis	2x	1
PI 541643	a550887-4349125-010319-489_E08	CPYR_1243.001		Fail	QC CR	Pyrus fauriei	P. fauriei MA x P. fauriei W-6	United States	Group 3	2x	1
PI 541791	a550887-4349125-010319-489_E09	CPYR_1377.001	34.5305	Pass		Pyrus hybrid	P. betulifolia-1 x P-79	United States-Oregon	Hybrids	2x	1	P. betulaefolia-1 x P-79 seedling selection
PI 654953	a550887-4349125-010319-489_E10	CPYR_2772.001	19.1009	Pass		Pyrus sp.	P. sp. 19647 - Turkmenistan	Turkmenistan	Hybrids	2x	1
PI 654948	a550887-4349125-010319-489_E11	CPYR_2762.001	35.4301	Pass		Pyrus sp.	K-23195 - Russia	Russian Federation	Hybrids	2x	1
PI 693202	a550887-4349125-010319-489_E12	CPYR_2649.002	23.9788	Pass		Pyrus communis	Summer Beurré De Arenberg	United Kingdom	Communis	2x	1	Beurre d'Aremberg seedling
PI 691229	a550887-4349125-010319-489_E13	CPYR_2870.001		Fail	QC CR	Pyrus sp.	VIII-65 Nepal	Nepal	Hybrids	2x	1
PI 293846	a550887-4349125-010319-489_E14	CPYR_1483.001	13.5771	Pass		Pyrus elaeagrifolia	P. elaeagrifolia - Crimea	Ukraine	Group 2	2x	1	Seedling selection from seed collected in Crimea, Ukraine
PI 541537	a550887-4349125-010319-489_E15	CPYR_2206.002	25.1139	Pass		Pyrus communis	Orcas	United States-Washington	Communis	2x	1	Chance seedling discovered on Eastsound, Orcas Island
PI 541785	a550887-4349125-010319-489_E16	CPYR_1357.001	37.5012	Pass		Pyrus hybrid	P. betulifolia-2 x Farmingdale	United States-Oregon	Hybrids	2x	1	P. betulifolia-2 x Farmingdale
PI 541158	a550887-4349125-010319-489_E17	CPYR_127.001	21.7606	Pass		Pyrus communis	Canal Pear	United States-Oregon	Communis	2x	1	Forelle x Max Red Bartlett
PI 541152	a550887-4349125-010319-489_E19	CPYR_97.004	24.0279	Pass		Pyrus communis	Bon Chretien Bonnamour	France	Communis	2x	1
PI 617582	a550887-4349125-010319-489_E20	CPYR_2503.001	22.6308	Pass		Pyrus communis	Mission La Purisima Pear 1-C	United States	Communis	2x	1
PI 691235	a550887-4349125-010319-489_E21	CPYR_2874.001	25.076	Pass		Pyrus hybrid	B II-3 = 28-30	Russian Federation	Hybrids	2x	1	P. salicifolia x Bartlett
PI 541439	a550887-4349125-010319-489_E22	CPYR_708.001	27	Pass		Pyrus communis	B-13 (Bartlett seedling - Virus Indicator)	United States	Communis	2x	1	Probably Bartlett x Anjou
PI 541194	a550887-4349125-010319-489_E23	CPYR_240.002	24.5449	Pass		Pyrus communis	General Galliene	France	Communis	2x	1
PI 541851	a550887-4349125-010319-489_F01	CPYR_846.001	4.86246	Pass		Pyrus mamorensis	P. mamorensis - Morocco	Morocco	Group 1	2x	1
PI 654954	a550887-4349125-010319-489_F02	CPYR_2775.001	27.5353	Pass		Pyrus sp.	Saarli 86-1 - Turkmenistan	Turkmenistan	Hybrids	2x	1
PI 541247	a550887-4349125-010319-489_F03	CPYR_470.002	27.6292	Pass		Pyrus communis	Pulteney	United States-New York	Communis	2x	1	Winter Nelis x Russet Bartlett
PI 541115	a550887-4349125-010319-489_F04	CPYR_15.002	21.0445	Pass		Pyrus communis	Ames	United States-Iowa	Communis	2x	1
PI 617609	a550887-4349125-010319-489_F06	CPYR_2535.001	33.8341	Pass		Pyrus hybrid	Lida	Russian Federation	Hybrids	2x	1
PI 541709	a550887-4349125-010319-489_F07	CPYR_216.002	32.7341	Pass		Pyrus hybrid	Estella	United States	Hybrids	2x	1	Kieffer x P. communis
PI 541248	a550887-4349125-010319-489_F08	CPYR_475.002	27.859	Pass		Pyrus communis	Anjou - Gebhard Red	United States-Washington	Communis	2x	1	Anjou, red bud mutation
PI 541127	a550887-4349125-010319-489_F09	CPYR_51.002	26.9958	Pass		Pyrus communis	Bergamotte d'Automne	NA	Communis	2x	1	Unknown, ancient cultivar
PI 541251	a550887-4349125-010319-489_F11	CPYR_484.002	25.3269	Pass		Pyrus communis	Reliance	United States	Communis	2x	1	Seedling selection
PI 541335	a550887-4349125-010319-489_F12	CPYR_1086.002	26.6777	Pass		Pyrus communis	Doyenne Gris	France	Communis	2x	1
PI 541282	a550887-4349125-010319-489_F13	CPYR_603.002	27.0112	Pass		Pyrus communis	White Star	NA	Communis	2x	1
PI 541337	a550887-4349125-010319-489_F14	CPYR_1088.004	26.3414	Pass		Pyrus communis	Early Green Sugar	NA	Communis	2x	1
PI 665805	a550887-4349125-010319-489_F15	CPYR_2774.001	17.3311	Pass		Pyrus sp.	Birleshik 84-2 - Turkmenistan	Turkmenistan	Hybrids	2x	1
PI 665804	a550887-4349125-010319-489_F17	CPYR_2822.001	17.4348	Pass		Pyrus sp.	Hyrs-Dere 84-1	Turkmenistan	Hybrids	2x	1
PI 231806	a550887-4349125-010319-489_F18	CPYR_416.002	21.5854	Pass		Pyrus communis	Normannischen Ciderbirne	France	Communis	2x	1
PI 541712	a550887-4349125-010319-489_F19	CPYR_250.003	24.2339	Pass		Pyrus hybrid	Good Christian	United States	Hybrids	2x	1	Chance seedling
PI 617601	a550887-4349125-010319-489_F20	CPYR_2525.001		Fail	QC CR	Pyrus hybrid	Tennessee	United States	Hybrids	2x	1
PI 349026	a550887-4349125-010319-489_F21	CPYR_989.001	12.9213	Pass		Pyrus communis subsp. pyraster	P. communis ssp. pyraster - Macedonia	Macedonia	Communis	2x	1	Seedling selection from wild Yugoslavian seedlot CPYR 989
PI 136620	a550887-4349125-010319-489_F22	CPYR_1064.001	24.8322	Pass		Pyrus communis	Bergamotte Arsene Sannier	France	Communis	2x	1
PI 541149	a550887-4349125-010319-489_F23	CPYR_90.002	23.585	Pass		Pyrus communis	Beurré Phillippe Delfosse	Belgium	Communis	2x	1	Chance seedling
PI 540938	a550887-4349125-010319-489_F24	CPYR_1609.003	11.7582	Pass		Pyrus spinosa	P. spinosa (amygdaliformis) - Turkey	Turkey	Group 2	2x	1	Seedling selection from seedlot WB-11 collected in Turkey
PI 654951	a550887-4349125-010319-489_G01	CPYR_2769.001	29.5812	Pass		Pyrus hybrid	Nart	Russia	Hybrids	2x	1
PI 541829	a550887-4349125-010319-489_G02	CPYR_815.001		Fail	QC CR	Pyrus koehnei	P. koehnei	California	Group 3	2x	1
PI 279336	a550887-4349125-010319-489_G03	CPYR_298.002	23.2039	Pass		Pyrus communis	Itala Pirovano	Italy	Communis	2x	1
PI 654926	a550887-4349125-010319-489_G04	CPYR_2654.002	17.7487	Pass		Pyrus ×sinkiangensis	Joghoso I	Pakistan	Group 4	2x	1	Collected from the wild in Pakistan
PI 541221	a550887-4349125-010319-489_G05	CPYR_361.002	23.11	Pass		Pyrus communis	Louis Vilmorin	France	Communis	2x	1	Seedling of cultivar Beurre Clairgeau
PI 691233	a550887-4349125-010319-489_G06	CPYR_2677.002	24.4468	Pass		Pyrus communis	HL-III-2/79	Czech Republic	Communis	2x	1
PI 292379	a550887-4349125-010319-489_G08	CPYR_471.004	22.3183	Pass		Pyrus communis	Radchinskaia	Russian Federation	Communis	2x	1
PI 541079	a550887-4349125-010319-489_G10	CPYR_1497.001		Fail	QC CR	Pyrus calleryana	OPR-132 P. calleryana	United States-Oregon	Group 3	2x	1
PI 541245	a550887-4349125-010319-489_G11	CPYR_466.002	25.5707	Pass		Pyrus communis	President Loubet	NA	Communis	2x	1
PI 617508	a550887-4349125-010319-489_G12	CPYR_802.001	10.4312	Pass		Pyrus hondoensis	P. hondoensis	United States	Group 4	2x	1	Seedling selection from seed collected wild in Japan
PI 691227	a550887-4349125-010319-489_G13	CPYR_2629.003	22.3785	Pass		Pyrus communis	Prosemica	Yugoslavia	Communis	2x	1
PI 40019	a550887-4349125-010319-489_G14	CPYR_314.001		Fail	QC CR	Pyrus sp.	Kansu Pear	China	Hybrids	2x	1
PI 541235	a550887-4349125-010319-489_G15	CPYR_418.003	26.6679	Pass		Pyrus communis	Notaire Lepin (= Doyenne George Boucher)	France	Communis	2x	1	seedling of Doyenne du Comice
PI 277526	a550887-4349125-010319-489_G16	CPYR_450.003	21.7059	Pass		Pyrus communis	Petit Muscat	France	Communis	2x	1
PI 541450	a550887-4349125-010319-489_G17	CPYR_1585.001	24.3025	Pass		Pyrus communis	Domestic Pear (OSU Seedling B) - looks like Bosc	United States	Communis	2x	1	Seedling selection B
PI 293844	a550887-4349125-010319-489_G19	CPYR_1605.001	21.5392	Pass		Pyrus hybrid	P. elaeagrifolia hybrid - Crimea	Ukraine	Hybrids	2x	1	Seedling selection from seedlot collected in Crimea, Ukraine
PI 688077	a550887-4349125-010319-489_G20	CPYR_2720.001	12.4434	Pass		Pyrus salicifolia	P. salicifolia BII-2-7-9 Russia	Russian Federation	Group 2	2x	1
PI 349023	a550887-4349125-010319-489_G21	CPYR_1615.001	12.8652	Pass		Pyrus spinosa	P. spinosa (amygdaliformis) - Macedonia (long chill required)	Macedonia	Group 2	2x	1	Increased seed from seedling sel. of Yugoslavian seedlot
PI 541260	a550887-4349125-010319-489_G22	CPYR_509.001	25.8846	Pass		Pyrus communis	Saint Ghislain	Belgium	Communis	2x	1
PI 541226	a550887-4349125-010319-489_G23	CPYR_373.003	23.1759	Pass		Pyrus communis	Madame Lye Baltet	France	Communis	2x	1
PI 541627	a550887-4349125-010319-489_G24	CPYR_1287.001	11.1276	Pass		Pyrus elaeagrifolia	P. elaeagrifolia Olez 2 - Turkey	Turkey	Group 2	2x	1	Seedling selection from seed collected in Turkey
PI 540936	a550887-4349125-010319-489_H01	CPYR_1600.001	9.9113	Pass		Pyrus spinosa	P. spinosa (amygdaliformis) - Sardinia	Italy	Group 2	2x	1	Seedling selection C from seedlot from Sardinia
PI 541129	a550887-4349125-010319-489_H02	CPYR_54.002	25.2848	Pass		Pyrus communis	Bergamotte Sageret	France	Communis	2x	1	Seedling of an unnamed P. communis cultivar
PI 541590	a550887-4349125-010319-489_H04	CPYR_1588.001	9.40964	Pass		Pyrus cordata	P. cordata - Turkey	United States	Group 1	2x	1	Seedling selection A from seedlot collected in Turkey
PI 541180	a550887-4349125-010319-489_H05	CPYR_196.002	26.0976	Pass		Pyrus communis	Duchesse de Berry d'Ete	France	Communis	2x	1	Seedling selection
PI 541685	a550887-4349125-010319-489_H06	CPYR_1595.005	15.8401	Pass		Pyrus hondoensis	P. hondoensis	United States	Group 4	2x	1	Seedling selection C from seedlot collected in Japan
PI 541489	a550887-4349125-010319-489_H07	CPYR_2032.002	24.409	Pass		Pyrus communis	Alexandrina Bivort	Belgium	Communis	2x	1
PI 541706	a550887-4349125-010319-489_H08	CPYR_125.003	38.0323	Pass		Pyrus hybrid	Campas No.2	United States-Florida	Hybrids	2x	1
PI 541469	a550887-4349125-010319-489_H09	CPYR_1710.001	26.6469	Pass		Pyrus communis	P. communis o.p. - Uzbekistan	Uzbekistan	Communis	2x	1	Open-pollinated from botanical collection
PI 292373	a550887-4349125-010319-489_H10	CPYR_583.002	21.563	Pass		Pyrus communis	Trubchanka Popularnaia	Ukraine	Communis	2x	1
PI 541804	a550887-4349125-010319-489_H11	CPYR_1661.001	29.7521	Pass		Pyrus hybrid	Gourmet	United States-South Dakota	Hybrids	2x	1	South Dakota F15 x Ewart
PI 541212	a550887-4349125-010319-489_H12	CPYR_339.002	27.1499	Pass		Pyrus communis	Lawrence	United States-New York	Communis	2x	1	St. Germain x White Doyenne
PI 617564	a550887-4349125-010319-489_H13	CPYR_2393.001	19.1794	Pass		Pyrus communis	Dave's Delight	Canada-Nova Scotia	Communis	2x	1
PI 502178	a550887-4349125-010319-489_H14	CPYR_1638.001	30.1234	Pass		Pyrus communis	P. communis - Macedonia (Smiljevka?)	Macedonia	Communis	2x	1
PI 541869	a550887-4349125-010319-489_H15	CPYR_1714.004	18.0051	Pass		Pyrus nivalis	P. nivalis 1219 - Uzbekistan	Uzbekistan	Group 1	2x	1	Open-pollinated from botanical collection
PI 654925	a550887-4349125-010319-489_H16	CPYR_2650.004	25.935	Pass		Pyrus communis	Marie Louise D'uccle	Belgium	Communis	2x	1	open pollinated seedling of Marie Louise
PI 617684	a550887-4349125-010319-489_H17	CPYR_2712.003	28.5834	Pass		Pyrus communis	Dunn Adobe Pear	California	Communis	2x	1
PI 688141	a550887-4349125-010319-489_H18	CPYR_2676.003	24.6556	Pass		Pyrus communis	TE-53-16-55 (Czech Republic)	Czech Republic	Communis	2x	1	Comtesse de Paris x Fondante de Charneu
PI 641276	a550887-4349125-010319-489_H19	CPYR_2582.004	23.0273	Pass		Pyrus sp.	Dardhe-e-kuge o.p. - Albania market	Albania	Hybrids	2x	1
PI 541279	a550887-4349125-010319-489_H20	CPYR_597.002	21.6415	Pass		Pyrus communis	W-1 fire blight resistant rootstock	United States-Oregon	Communis	2x	1	Seedling selection
PI 541300	a550887-4349125-010319-489_H21	CPYR_1645.001	24.6823	Pass		Pyrus communis	Spadona di Salerno	Italy	Communis	2x	1
PI 541239	a550887-4349125-010319-489_H22	CPYR_433.002	20.9114	Pass		Pyrus hybrid	Orel No. 15	Russian Federation	Hybrids	2x	1
PI 300693	a550887-4349125-010319-489_H23	CPYR_38.001_04	30.534	Pass		Pyrus communis	Bartlett	United Kingdom	Communis	2x	1
PI 617595	a550887-4349125-010319-489_H24	CPYR_2519.001	28.2023	Pass		Pyrus communis	US 309	United States	Communis	2x	1
PI 279330	a550887-4349125-010319-489_I01	CPYR_197.002	27.07	Pass		Pyrus communis	Duchesse de Bordeaux (= Beurré Perrault)	France	Communis	2x	1
PI 541477	a550887-4349125-010319-489_I02	CPYR_2295.001	24.1526	Pass		Pyrus communis	Hudar	United States	Communis	2x	1
PI 617651	a550887-4349125-010319-489_I03	CPYR_2592.001	24.9079	Pass		Pyrus communis	Erwin's Delight	United States	Communis	2x	1	Selection of Pyrus communis
PI 541210	a550887-4349125-010319-489_I04	CPYR_286.004	24.7607	Pass		Pyrus communis	Howell - Sport	United States	Communis	2x	1	Howell is a seedling of local cultivar Jonah. Howell - Sport is a red skin bud mutation, origin uncertain
PI 617685	a550887-4349125-010319-489_I05	CPYR_2713.001	23.1885	Pass		Pyrus communis	I-5 Milepost 238	United States-Oregon	Communis	2x	1	Collected from roadside in Oregon.
PI 617672	a550887-4349125-010319-489_I06	CPYR_2617.001	26.0079	Pass		Pyrus hybrid	Quave	United States-Mississippi	Hybrids	2x	1
PI 541160	a550887-4349125-010319-489_I07	CPYR_129.002	24.1582	Pass		Pyrus hybrid	Cayuga	United States-New York	Hybrids	2x	1	Seedling of cultivar Seckel
PI 665738	a550887-4349125-010319-489_I08	CPYR_1343.001	24.2507	Pass		Pyrus communis	OHxF 69	United States-Oregon	Communis	2x	1	Old Home x Bartlett
PI 540940	a550887-4349125-010319-489_I09	CPYR_1611.001	11.4499	Pass		Pyrus spinosa	P. spinosa (amygdaliformis) - Turkey	Turkey	Group 2	2x	1	Seedling selection from seedlot WB-8 Collected by Woodbridge (WB) in Turkey
PI 541183	a550887-4349125-010319-489_I10	CPYR_202.003		Fail	QC CR	Pyrus communis	Early Harvest (=Chambers)	United States-Maryland	Communis	2x	1
PI 541137	a550887-4349125-010319-489_I11	CPYR_65.002	26.0611	Pass		Pyrus communis	Beurré de Bollwiller	France	Communis	2x	1
PI 654955	a550887-4349125-010319-489_I12	CPYR_2776.001	16.9346	Pass		Pyrus communis	Karadede 86-3 - Turkmenistan	Turkmenistan	Communis	2x	1
PI 654935	a550887-4349125-010319-489_I13	CPYR_2698.004	24.1876	Pass		Pyrus communis	Zimska Kajuska	Macedonia	Communis	2x	1
PI 654945	a550887-4349125-010319-489_I14	CPYR_2757.001	24.7691	Pass		Pyrus communis	Bellissime d'Hiver	France	Communis	2x	1
PI 617585	a550887-4349125-010319-489_I15	CPYR_2506.002	25.2722	Pass		Pyrus communis	Premices de Maria Lesueur	NA	Communis	2x	1
PI 541363	a550887-4349125-010319-489_I16	CPYR_480.002	23.2922	Pass		Pyrus communis	Beurré Hardy - Royal Red	California	Communis	2x	1
PI 541716	a550887-4349125-010319-489_I17	CPYR_535.001	36.341	Pass		Pyrus hybrid	Smith	United States	Hybrids	2x	1	P. pyrifolia hybrid
PI 654933	a550887-4349125-010319-489_I18	CPYR_2689.002	25.3016	Pass		Pyrus communis	De Su Duca	Portugal	Communis	2x	1
PI 541223	a550887-4349125-010319-489_I19	CPYR_364.002	26.4044	Pass		Pyrus communis	Lucy Duke	United States-North Carolina	Communis	2x	1
PI 617635	a550887-4349125-010319-489_I20	CPYR_2565.001	34.6034	Pass		Pyrus hybrid	Thomas	Canada	Hybrids	2x	1	Pyrus ussuriensis x Bartlett
PI 541240	a550887-4349125-010319-489_I21	CPYR_446.001	22.265	Pass		Pyrus communis	P. Barry	California	Communis	2x	1	Seedling of cultivar Belle Lucrative
PI 617660	a550887-4349125-010319-489_I22	CPYR_2605.004	35.3825	Pass		Pyrus hybrid	Honey Dew	United States-Illinois	Hybrids	2x	1
PI 617593	a550887-4349125-010319-489_I23	CPYR_2517.001	26.3946	Pass		Pyrus communis	Rombough Mite Resistant Pear #1	United States	Communis	2x	1
PI 665777	a550887-4349125-010319-489_I24	CPYR_2631.002	21.7928	Pass		Pyrus communis	Sidi Bou Ali No 3 - Tunisia	Tunisia	Communis	2x	1	Local cultivar from Sidi Bou Ali, Tunisia
PI 617565	a550887-4349125-010319-489_J01	CPYR_2395.001	37.9903	Pass		Pyrus hybrid	Hermit	United States	Hybrids	2x	1
PI 541501	a550887-4349125-010319-489_J02	CPYR_2105.002	23.7476	Pass		Pyrus communis	June Sugar	United States	Communis	2x	1
PI 541385	a550887-4349125-010319-489_J03	CPYR_1016.001	18.3274	Pass		Pyrus communis	P. communis - Turkey	Turkey	Communis	2x	1	Collected from the wild in Turkey
PI 689457	a550887-4349125-010319-489_J04	CIGC_14.001		Fail	QC CR	×Pyronia	Japanese Pear x Quince	Japan	Outgroup	2x	1
PI 541471	a550887-4349125-010319-489_J05	CPYR_1721.003	22.1053	Pass		Pyrus communis	P. communis o.p. - Uzbekistan	Uzbekistan	Communis	2x	1	Open-pollinated from botanical collection
PI 349027	a550887-4349125-010319-489_J06	CPYR_991.002	20.8329	Pass		Pyrus communis subsp. pyraster	P. communis ssp. pyraster - Macedonia	Macedonia	Communis	2x	1	Seedling selection from wild Yugoslavian seedlot CPYR 991
PI 541486	a550887-4349125-010319-489_J07	CPYR_2029.001	23.9956	Pass		Pyrus communis	Winnals Longdon	United Kingdom	Communis	2x	1	Probably a chance seedling
PI 541382	a550887-4349125-010319-489_J08	CPYR_1005.001	18.4241	Pass		Pyrus communis subsp. pyraster	P. communis ssp. pyraster Olez 4 - Turkey	Turkey	Communis	2x	1	Collected from the wild in Turkey
PI 541866	a550887-4349125-010319-489_J09	CPYR_970.002	24.2535	Pass		Pyrus nivalis	P. nivalis - United Kingdom	United Kingdom	Group 1	2x	1	Open-pollinated from botanical collection
PI 541471	a550887-4349125-010319-489_J10	CPYR_1721.001	24.2577	Pass		Pyrus communis	P. communis o.p. - Uzbekistan	Uzbekistan	Communis	2x	1	Open-pollinated from botanical collection
PI 502170	a550887-4349125-010319-489_J11	CPYR_1630.001	23.2445	Pass		Pyrus communis	Edmundka	Poland	Communis	2x	1
PI 641276	a550887-4349125-010319-489_J12	CPYR_2582.001	22.5523	Pass		Pyrus sp.	Dardhe-e-kuge o.p. - Albania market	Albania	Hybrids	2x	1
PI 541459	a550887-4349125-010319-489_J13	CPYR_1646.001	24.8042	Pass		Pyrus communis	Coscia (Precoce?)	Italy	Communis	2x	1	Precoce di Cassano x Coscia
PI 638005	a550887-4349125-010319-489_J14	CPYR_2813.001	14.4865	Pass		Pyrus communis subsp. caucasica	P. communis ssp. caucasica - Armenia, Spitaki-2	Armenia	Communis	2x	1	Collected from the wild in Armenia.
PI 541468	a550887-4349125-010319-489_J15	CPYR_1705.001	21.8783	Pass		Pyrus communis	P. communis o.p. - Uzbekistan	Uzbekistan	Communis	2x	1	Open-pollinated from botanical collection
PI 617598	a550887-4349125-010319-489_J16	CPYR_2522.002	24.9947	Pass		Pyrus korshinskyi	P. korshinskyi 94011 - Kyrgyzstan	Kyrgyzstan	Group 1	2x	1	Open pollinated seed from single tree growing in a group of P. communis and P. korshinskyi. Thus maybe hybrid or pure.
PI 617528	a550887-4349125-010319-489_J17	CPYR_2205.001	39.037	Pass		Pyrus hybrid	Nijisseiki x D'Anjou	United States	Hybrids	2x	1	20th Century x D'Anjou
PI 541468	a550887-4349125-010319-489_J18	CPYR_1705.002	22.2706	Pass		Pyrus communis	P. communis o.p. - Uzbekistan	Uzbekistan	Communis	2x	1	Open-pollinated from botanical collection
PI 541417	a550887-4349125-010319-489_J19	CPYR_1351.001	25.7809	Pass		Pyrus communis	OHxF 109	United States-Oregon	Communis	2x	1	Old Home x Bartlett
PI 638007	a550887-4349125-010319-489_J20	CPYR_2815.002	12.2122	Pass		Pyrus communis subsp. caucasica	P. communis ssp. caucasica - Armenia, Spitaki-4	Armenia	Communis	2x	1	Collected from the wild in Armenia.
PI 541350	a550887-4349125-010319-489_J21	CPYR_1145.003	27.0476	Pass		Pyrus communis	Southworth	United States-Minnesota	Communis	2x	1
PI 657920	a550887-4349125-010319-489_J22	CPYR_2846.002	24.2661	Pass		Pyrus communis	Zebra Pear O.P. - Georgia	Georgia	Communis	2x	1	Fruit purchased at market in Gori, Georgia.
PI 349026	a550887-4349125-010319-489_J24	CPYR_989.006	19.2229	Pass		Pyrus communis subsp. pyraster	P. communis ssp. pyraster (foliage mutant) - Macedonia	Macedonia	Communis	2x	1	Seedling selection from wild Yugoslavian seedlot CPYR 989
PI 300693	a550887-4349125-010319-489_K01	CPYR_38.001_02	30.5242	Pass		Pyrus communis	Bartlett	United Kingdom	Communis	2x	1
PI 541264	a550887-4349125-010319-489_K02	CPYR_536.002	24.1638	Pass		Pyrus communis	Snyder	United States	Communis	2x	1
PI 638019	a550887-4349125-010319-489_K03	CPYR_2829.001	23.983	Pass		Pyrus communis	X-Ceptional	United States-Oregon	Communis	2x	1
PI 541219	a550887-4349125-010319-489_K04	CPYR_357.003	22.1221	Pass		Pyrus communis	Longworth	United States-Iowa	Communis	2x	1
PI 293834	a550887-4349125-010319-489_K05	CPYR_2066.001	19.7707	Pass		Pyrus communis subsp. pyraster	P. communis ssp. pyraster - Crimea	Ukraine	Communis	2x	1	Seedling selection from seedlot collected in Ukraine
PI 541228	a550887-4349125-010319-489_K06	CPYR_380.004	27.0308	Pass		Pyrus communis	Marchland	NA	Communis	2x	1
PI 279329	a550887-4349125-010319-489_K07	CPYR_82.002	26.0527	Pass		Pyrus communis	Beurré Henri Courcelle	France	Communis	2x	1	Bergamotte Esperen seedling
PI 688191	a550887-4349125-010319-489_K08	CPYR_2913.001	26.3764	Pass		Pyrus communis	96.FI.12 (P. communis rootstock clone)	France	Communis	2x	1	Pyrus communis 'Mora' or 'Volpina' (open pollinated) Cross made in 1979.
PI 506382	a550887-4349125-010319-489_K09	CPYR_1672.001		Fail	QC CR	xSorbopyrus (intergeneric hybrid)	Baciu 2	Romania	Outgroup	2x	1
PI 617652	a550887-4349125-010319-489_K10	CPYR_2593.001		Fail	QC CR	Pyrus communis	Untoasa de Geoagiu	Romania	Communis	2x	1
PI 617584	a550887-4349125-010319-489_K11	CPYR_2505.001	21.5434	Pass		Pyrus communis	Joey's Red Flesh Pear (=Blutbirne?)	NA	Communis	2x	1
PI 617662	a550887-4349125-010319-489_K12	CPYR_2607.001	35.4455	Pass		Pyrus hybrid	Oakhill	United States-Texas	Hybrids	2x	1
PI 541176	a550887-4349125-010319-489_K13	CPYR_190.002	26.162	Pass		Pyrus communis	Doyenne Goubault	France	Communis	2x	1	Seedling selection
PI 541161	a550887-4349125-010319-489_K14	CPYR_131.001	22.6308	Pass		Pyrus communis	Chapin	United States-New York	Communis	2x	1	Seedling of cultivar Seckel
PI 541488	a550887-4349125-010319-489_K15	CPYR_2031.001	23.9648	Pass		Pyrus communis	Olivier de Serres	France	Communis	2x	1	open pollinated seedling of Forunee d'Angers
PI 617617	a550887-4349125-010319-489_K16	CPYR_2543.001	31.8695	Pass		Pyrus communis	Arbi	Tunisia	Communis	2x	1
PI 541312	a550887-4349125-010319-489_K17	CPYR_313.002	24.0811	Pass		Pyrus communis	Kalle	United States-Michigan	Communis	2x	1	Clapp Favorite mutant
PI 541266	a550887-4349125-010319-489_K18	CPYR_548.002	25.2063	Pass		Pyrus communis	Stout	United States-Indiana	Communis	2x	1
PI 617637	a550887-4349125-010319-489_K19	CPYR_2567.002	24.8392	Pass		Pyrus communis	Souvenir du Congress	France	Communis	2x	1
PI 256000	a550887-4349125-010319-489_K21	CIGC_28.001	19.185	Pass		xSorbopyrus (intergeneric hybrid)	Pollwiller Pear	Europe	Outgroup	2x	1
PI 295095	a550887-4349125-010319-489_K22	CPYR_514.005	25.7711	Pass		Pyrus communis	Santa Maria	Italy	Communis	2x	1	Bartlett x Coscia
PI 440631	a550887-4349125-010319-489_K23	CPYR_695.001	22.1025	Pass		Pyrus communis subsp. caucasica	P. communis ssp. caucasica - Gofitskoye	Russian Federation	Communis	2x	1	Seedling selection from seedlot collected in Russia.
PI 617632	a550887-4349125-010319-489_K24	CPYR_2562.001	31.2137	Pass		Pyrus hybrid	Petrovski	NA	Hybrids	2x	1
PI 541724	a550887-4349125-010319-489_L01	CPYR_1114.004	26.4521	Pass		Pyrus hybrid	Mandan 58-4	United States	Hybrids	2x	1	Patten x Parker, hybrid
PI 541869	a550887-4349125-010319-489_L02	CPYR_1714.001	21.0782	Pass		Pyrus nivalis	P. nivalis 1219 - Uzbekistan	Uzbekistan	Group 1	2x	1	Open-pollinated from botanical collection
PI 129642	a550887-4349125-010319-489_L03	CPYR_1156.002	25.502	Pass		Pyrus communis	Tyford Monarch	Australia	Communis	2x	1
PI 657920	a550887-4349125-010319-489_L04	CPYR_2846.006	23.5991	Pass		Pyrus communis	Zebra Pear O.P. - Georgia	Georgia	Communis	2x	1	Fruit purchased at market in Gori, Georgia.
PI 541343	a550887-4349125-010319-489_L05	CPYR_1111.004	22.5649	Pass		Pyrus communis	Mac	United States-New Jersey	Communis	2x	1	Gorham x NJ 1
PI 541723	a550887-4349125-010319-489_L06	CPYR_1083.001	32.5855	Pass		Pyrus hybrid	Douglas	United States-Kansas	Hybrids	2x	1	Kieffer x Duchess d'Angouleme (probably)
PI 132103	a550887-4349125-010319-489_L07	CPYR_531.001	16.9486	Pass		Pyrus pyrifolia	Shu Li	China	Group 4	2x	1
PI 617561	a550887-4349125-010319-489_L08	CPYR_2384.002	35.1499	Pass		Pyrus hybrid	Pineapple	NA	Hybrids	2x	1	Unknown seedling may have been brought from China in the 1850s. Named Pineapple by Georgia Exp. Station.
PI 352645	a550887-4349125-010319-489_L09	CPYR_555.001	23.983	Pass		Pyrus pyrifolia	Suishu	Japan	Group 4	2x	1
PI 617647	a550887-4349125-010319-489_L10	CPYR_2586.002	30.5368	Pass		Pyrus pyrifolia	Vietnam Asian Pear	Vietnam	Group 4	2x	1	selection of Pyrus pyrifolia
PI 541408	a550887-4349125-010319-489_L11	CPYR_1336.001	24.7691	Pass		Pyrus communis	OHxF 1	United States-Oregon	Communis	2x	1	Old Home x Bartlett
PI 541411	a550887-4349125-010319-489_L12	CPYR_1339.001	25.6295	Pass		Pyrus communis	OHxF 23	United States-Oregon	Communis	2x	1	Old Home x Bartlett
PI 688192	a550887-4349125-010319-489_L13	CPYR_2947.001	20.0006	Pass		Pyrus communis	Faccia della Madonna	Italy	Communis	2x	1
PI 189686	a550887-4349125-010319-489_L14	CPYR_1155.003	23.9998	Pass		Pyrus communis	Tsarigradka	Yugoslavia	Communis	2x	1
PI 654930	a550887-4349125-010319-489_L15	CPYR_2678.003	21.4509	Pass		Pyrus communis	Vila	Czech Republic	Communis	2x	1
PI 541330	a550887-4349125-010319-489_L16	CPYR_1071.003	21.5504	Pass		Pyrus communis	Blanquet Precoce	NA	Communis	2x	1
PI 131992	a550887-4349125-010319-489_L17	CPYR_1078.005	25.8341	Pass		Pyrus communis	Citron D'Ete	Belgium	Communis	2x	1
PI 143979	a550887-4349125-010319-489_L18	CPYR_1130.001	23.784	Pass		Pyrus hybrid	Olia	Russian Federation	Hybrids	2x	1	P. ussuriensis x Finland Early Yellow
PI 131045	a550887-4349125-010319-489_L19	CPYR_1102.002	23.4309	Pass		Pyrus communis	Jakobowka Hanowerska	Poland	Communis	2x	1
PI 641287	a550887-4349125-010319-489_L20	CPYR_2807.001	28.1322	Pass		Pyrus hybrid	Acres Home	United States-Texas	Hybrids	2x	1
PI 541455	a550887-4349125-010319-489_L21	CPYR_1306.003	25.0592	Pass		Pyrus communis	Beierschmitt	United States-Iowa	Communis	2x	1
PI 540984	a550887-4349125-010319-489_L22	CPYR_1381.001	5.46221	Pass		Pyrus betulifolia	OPR-262 P. betulifolia	United States	Group 3	2x	1
PI 638016	a550887-4349125-010319-489_L23	CPYR_2826.001	24.5758	Pass		Pyrus communis	Yaquina (Payson)	United States-Oregon	Communis	2x	1
PI 449287	a550887-4349125-010319-489_L24	CPYR_408.003	35.4217	Pass		Pyrus communis	Verbelu	Poland	Communis	2x	1
PI 540965	a550887-4349125-010319-489_M01	CPYR_1216.001	6.51038	Pass		Pyrus betulifolia	P. betulifolia	United States	Group 3	2x	1	Seedling selection from P. betulifolia-3
PI 617612	a550887-4349125-010319-489_M02	CPYR_2538.001	23.6607	Pass		Pyrus communis	Oranzhevaja	Russian Federation	Communis	2x	1
PI 641290	a550887-4349125-010319-489_M03	CPYR_2810.001	35.4455	Pass		Pyrus hybrid	Vermilion	United States-Louisiana	Hybrids	2x	1
PI 541122	a550887-4349125-010319-489_M04	CPYR_31.003	24.4707	Pass		Pyrus communis	Barillet Deschamp	France	Communis	2x	1
PI 91450	a550887-4349125-010319-489_M05	CPYR_1129.002	24.3053	Pass		Pyrus pyrifolia	P. pyrifolia hybrid	NA	Group 4	2x	1	Probably a seedling selection
PI 541182	a550887-4349125-010319-489_M06	CPYR_200.001	24.8616	Pass		Pyrus communis	Duchesse de Mouchy	France	Communis	2x	1
PI 337444	a550887-4349125-010319-489_M08	CPYR_497.001	26.1368	Pass		Pyrus communis	Rousselet of Stuttgart x Dr. Jules Guyot No. II	Russian Federation	Communis	2x	1	R. Shtutgartskii x Dr. J. Guyot
PI 45845	a550887-4349125-010319-489_M09	CPYR_620.001	15.8387	Pass		Pyrus ×bretschneideri	Yaguang Li [Ya Kuang Li]	China	Group 4	2x	1	Reimer suspected P. ussuriensis x P. phaeocarpa
PI 541153	a550887-4349125-010319-489_M10	CPYR_108.002	25.5272	Pass		Pyrus communis	Buffum	United States-Rhode Island	Communis	2x	1	Possibly a seedling of cultivar White Doyenne
PI 665771	a550887-4349125-010319-489_M11	CPYR_2989.003	15.7911	Pass		Pyrus ×sinkiangensis	Chinese Fragrant Pear	China	Group 4	2x	1
PI 541222	a550887-4349125-010319-489_M12	CPYR_362.001		Fail	dQC	Pyrus communis	Lowry No. 1	United States	Communis	2x	1
PI 688096	a550887-4349125-010319-489_M13	CPYR_2764.001	21.8909	Pass		Pyrus pyrifolia	Hong Yiungli	China	Group 4	2x	1
PI 541125	a550887-4349125-010319-489_M14	CPYR_43.004		Fail	QC CR	Pyrus communis	Belle de Beugny	France	Communis	2x	1
PI 215321	a550887-4349125-010319-489_M15	CPYR_36.002	25.3731	Pass		Pyrus communis	Baronne Leroy	France	Communis	2x	1	possibly a seedling of cultivar Bonne de Printemps
PI 541167	a550887-4349125-010319-489_M16	CPYR_150.002	25.7094	Pass		Pyrus communis	Comte de Lambertye	France	Communis	2x	1	Seedling of cultivar Beurre Superfin
PI 617581	a550887-4349125-010319-489_M17	CPYR_2502.001	24.3515	Pass		Pyrus communis	Mission La Purisima Pear 17-G	United States	Communis	2x	1
PI 324030	a550887-4349125-010319-489_M18	CPYR_2039.001	20.8806	Pass		Pyrus communis subsp. caucasica	P. communis ssp. caucasica - Stavropol	Russian Federation	Communis	2x	1	Seedling selection from seedlot collected in Russia
PI 324134	a550887-4349125-010319-489_M19	CPYR_406.001	21.343	Pass		Pyrus communis	Mustafabey	Turkey	Communis	2x	1
PI 617670	a550887-4349125-010319-489_M20	CPYR_2615.001	37.5909	Pass		Pyrus hybrid	Pope [Bonner]	Georgia	Hybrids	2x	1
PI 617600	a550887-4349125-010319-489_M21	CPYR_2524.001	35.1008	Pass		Pyrus hybrid	Leona	United States	Hybrids	2x	1
PI 638013	a550887-4349125-010319-489_M22	CPYR_2823.001	25.5342	Pass		Pyrus communis	Bloodgood (=Julienne?)	United States-New York	Communis	2x	1
PI 541540	a550887-4349125-010319-489_M23	CPYR_2266.003	23.0694	Pass		Pyrus communis	Laxton's Record	United Kingdom	Communis	2x	1	Marie Louise x Doyenne du Comice
PI 300693	a550887-4349125-010319-489_M24	CPYR_38.001_02	30.527	Pass		Pyrus communis	Bartlett	United Kingdom	Communis	2x	1
PI 657929	a550887-4349125-010319-489_N01	CPYR_2922.001	24.8266	Pass		Pyrus communis	Sauvignac	Canada-Quebec	Communis	2x	1
PI 693203	a550887-4349125-010319-489_N02	CPYR_2634.003	16.5758	Pass		Pyrus ussuriensis	Ching-Shan Li	China	Group 4	2x	1
PI 665749	a550887-4349125-010319-489_N03	CPYR_2940.001	35.6375	Pass		Pyrus hybrid	Patricke Pear	United States-Louisiana	Hybrids	2x	1
PI 300693	a550887-4349125-010319-489_N04	CPYR_38.001_05	30.527	Pass		Pyrus communis	Bartlett	United Kingdom	Communis	2x	1
PI 541908	a550887-4349125-010319-489_N05	CPYR_1185.001	34.0933	Pass		Pyrus pyrifolia	Okolo	United States-South Dakota	Group 4	2x	1
PI 541948	a550887-4349125-010319-489_N06	CPYR_891.001	13.9064	Pass		Pyrus salicifolia	P. salicifolia No. 1	United States	Group 2	2x	1
PI 541867	a550887-4349125-010319-489_N07	CPYR_1590.001	26.2685	Pass		Pyrus nivalis	P. nivalis Y-5	United States	Group 1	2x	1	Seedling selection from seedlot collected in Yugoslavia
PI 654915	a550887-4349125-010319-489_N08	CPYR_2439.001	30.237	Pass		Pyrus communis	Romania 4/115 F2-8-194	Romania	Communis	2x	1
PI 506379	a550887-4349125-010319-489_N09	CPYR_1684.001	19.5423	Pass		Pyrus communis subsp. pyraster	P. communis ssp. pyraster - Romania	Romania	Communis	2x	1
PI 292377	a550887-4349125-010319-489_N10	CPYR_472.001	23.6803	Pass		Pyrus communis	Ranniaia Mleevskaia (Mleevskaya Rannaya)	Russian Federation	Communis	2x	1
PI 130990	a550887-4349125-010319-489_N11	CPYR_1113.001	24.601	Pass		Pyrus communis	Madame Verte	Belgium	Communis	2x	1
PI 617663	a550887-4349125-010319-489_N12	CPYR_2608.001	12.9045	Pass		Pyrus pyrifolia	Shin Li	California	Group 4	2x	1	Kikusui x Tse Li
PI 541356	a550887-4349125-010319-489_N13	CPYR_1160.001	25.9392	Pass		Pyrus communis	Willard	United States	Communis	2x	1	Bartlett x Dorset
PI 289525	a550887-4349125-010319-489_N14	CPYR_532.002	17.7921	Pass		Pyrus sp.	Sion Szu Mi	China	Hybrids	2x	1
PI 541203	a550887-4349125-010319-489_N15	CPYR_1097.001	19.5648	Pass		Pyrus communis	Harvest Queen (HW 602)	Canada-Ontario	Communis	2x	1	Bartlett x Michigan 572 (Barseck x Bartlett)
PI 637988	a550887-4349125-010319-489_N16	CPYR_2545.001	22.5033	Pass		Pyrus ussuriensis	Liu Yue Xian [Liu Yue Shian]	United States	Group 4	2x	1
PI 131135	a550887-4349125-010319-489_N17	CPYR_1136.002	27.1359	Pass		Pyrus communis	President Loutreul	France	Communis	2x	1
PI 541428	a550887-4349125-010319-489_N18	CPYR_1369.001	27.0224	Pass		Pyrus communis	OHxF 377	United States-Oregon	Communis	2x	1	Old Home x Bartlett
PI 279328	a550887-4349125-010319-489_N19	CPYR_1066.003	26.092	Pass		Pyrus communis	Bergamote Tardive de Ganzel	United Kingdom	Communis	2x	1	Chance seedling, same as Colmar?
PI 541339	a550887-4349125-010319-489_N20	CPYR_1096.001	20.7082	Pass		Pyrus communis	HW 600 (Harrow, Ontario)	Canada-Ontario	Communis	2x	1	Bartlett x US 386
PI 654943	a550887-4349125-010319-489_N21	CPYR_2754.001	8.46237	Pass		Pyrus pyrifolia	Hakko	Japan	Group 4	2x	1	Yakumo x Kosui
PI 541430	a550887-4349125-010319-489_N23	CPYR_1375.001	23.2403	Pass		Pyrus communis subsp. pyraster	OPR-001	United States	Communis	2x	1	Seedling of cultivar Anjou
PI 654921	a550887-4349125-010319-489_N24	CPYR_2450.001	23.7938	Pass		Pyrus communis	Magnate	NA	Communis	2x	1	Seedling of Louise Bonne Jersey
PI 358953	a550887-4349125-010319-489_O01	CPYR_886.001	8.64454	Pass		Pyrus pyrifolia	HN-36 P. pyrifolia (Virus Indicator)	Japan	Group 4	2x	1	Seedling of cultivar Nijusseki
PI 541276	a550887-4349125-010319-489_O02	CPYR_586.001	23.6986	Pass		Pyrus communis	USDA No. 463	United States	Communis	2x	1
PI 145821	a550887-4349125-010319-489_O03	CPYR_596.001	38.8086	Pass		Pyrus hybrid	Vineland 29018	Canada	Hybrids	2x	1	Bartlett x Ya Li
PI 541084	a550887-4349125-010319-489_O04	CPYR_1614.001	35.9332	Pass		Pyrus calleryana	P. calleryana (hybrid)	United States	Group 3	2x	1	Seedling selection from OP seed
PI 541278	a550887-4349125-010319-489_O06	CPYR_593.002	26.305	Pass		Pyrus communis	Verte Longue d'Automne	France	Communis	2x	1
PI 693204	a550887-4349125-010319-489_O07	CPYR_2983.001	21.0571	Pass		Pyrus communis	Birleshik 84-1 - Turkmenistan	Turkmenistan	Communis	2x	1
PI 541203	a550887-4349125-010319-489_O08	CPYR_265.001	19.5648	Pass		Pyrus communis	Harvest Queen (HW 602)	Canada-Ontario	Communis	2x	1
PI 617580	a550887-4349125-010319-489_O09	CPYR_2501.001	22.6042	Pass		Pyrus communis	Mission La Purisima Pear 2-A	United States	Communis	2x	1
PI 541246	a550887-4349125-010319-489_O10	CPYR_468.004	25.3591	Pass		Pyrus communis	Professor Grosdemage	France	Communis	2x	1
PI 215329	a550887-4349125-010319-489_O11	CPYR_513.003	23.9143	Pass		Pyrus communis	Santa Claus	Belgium	Communis	2x	1
PI 541067	a550887-4349125-010319-489_O13	CPYR_1428.003	24.4482	Pass		Pyrus calleryana	P. calleryana	United States	Group 3	2x	1
PI 541254	a550887-4349125-010319-489_O14	CPYR_491.004	24.4637	Pass		Pyrus communis	Rosee de Juillet	France	Communis	2x	1
PI 483371	a550887-4349125-010319-489_O15	CPYR_1525.005	23.6817	Pass		Pyrus communis subsp. pyraster	Grusha ot Nagorskiego [Grusza od ...]	Russia	Communis	2x	1
PI 641280	a550887-4349125-010319-489_O16	CPYR_2597.001	22.6532	Pass		Pyrus sp.	Ledbetter Pear	United States-Alabama	Hybrids	2x	1
PI 617675	a550887-4349125-010319-489_O18	CPYR_2620.001	24.1386	Pass		Pyrus communis	Beurré Six	Belgium	Communis	2x	1	Seedling selection
PI 264196	a550887-4349125-010319-489_O19	CPYR_384.001	24.2787	Pass		Pyrus communis	Mathilde Recq. 68	France	Communis	2x	1
PI 617633	a550887-4349125-010319-489_O20	CPYR_2563.001	35.0826	Pass		Pyrus hybrid	Simon	Canada-Saskatchewan	Hybrids	2x	1	Pyrus ussuriensis x Aspa
PI 263682	a550887-4349125-010319-489_O21	CPYR_341.003	27.6095	Pass		Pyrus communis	Le Brun	France	Communis	2x	1	From mixed seed of Doyenne D'Hiver and Beurre D'Arenberg
PI 542020	a550887-4349125-010319-489_O22	CPYR_1332.001	11.1248	Pass		Pyrus ussuriensis	P. ussuriensis	United States	Group 4	2x	1	Seedling selection from Asian seedlot
PI 46582	a550887-4349125-010319-489_O24	CPYR_1650.001	15.6201	Pass		Pyrus ×phaeocarpa	P. x phaeocarpa	Korea-South	Hybrids	2x	1	Seedling selection
PI 322711	a550887-4349125-010319-489_P01	CPYR_903.001	24.1161	Pass		Pyrus communis	B-37 (P. communis) - Ukraine	Ukraine	Communis	2x	1	Possibly originally collected wild
PI 617676	a550887-4349125-010319-489_P02	CPYR_2621.001	22.8788	Pass		Pyrus communis	Osenniaja Jakovleva	NA	Communis	2x	1
PI 541776	a550887-4349125-010319-489_P03	CPYR_1315.001	18.2265	Pass		Pyrus hybrid	P. ussuriensis x P. calleryana	United States	Hybrids	2x	1	P. ussuriensis x P. calleryana seedling selection
PI 657918	a550887-4349125-010319-489_P04	CPYR_2798.003	11.171	Pass		Pyrus salicifolia	P. salicifolia ARM-02-076 - Armenia, Arpa Gorge	Armenia	Group 2	2x	1	Collected from the wild in Armenia.
PI 542007	a550887-4349125-010319-489_P05	CPYR_1157.002	15.3903	Pass		Pyrus ussuriensis	Tzu Ma Li	China	Group 4	2x	1
PI 318838	a550887-4349125-010319-489_P06	CPYR_1723.001	26.0695	Pass		Pyrus communis	Menie	Canada-Ontario	Communis	2x	1	Kurskaya x Flemish Beauty
PI 324127	a550887-4349125-010319-489_P07	CPYR_235.002	24.9135	Pass		Pyrus communis	Fragrante	Italy	Communis	2x	1	Berg. Esperen x Passe Crassane (mag. pollen)
PI 318866	a550887-4349125-010319-489_P08	CPYR_16.006	24.353	Pass		Pyrus communis	Andre Desportes	France	Communis	2x	1	Seedling of Williams bon Chretien (Bartlett).
PI 307508	a550887-4349125-010319-489_P09	CPYR_607.001	30.5284	Pass		Pyrus communis	Bartlett - Swiss compatible with Quince	United Kingdom	Communis	2x	1	Chance seedling
PI 322034	a550887-4349125-010319-489_P11	CPYR_46.001	26.6427	Pass		Pyrus communis	Belle Guerandaise	France	Communis	2x	1	seedling pf Doyenné du Comice
PI 352659	a550887-4349125-010319-489_P12	CPYR_564.002	22.4178	Pass		Pyrus communis	Tamiioasa Robert	Romania	Communis	2x	1
PI 324133	a550887-4349125-010319-489_P13	CPYR_401.003	24.9779	Pass		Pyrus communis	Mora	Italy	Communis	2x	1	Butirra Clairgeau x Martin Secco (x-ray pollen)
PI 255611	a550887-4349125-010319-489_P14	CPYR_222.003	25.3969	Pass		Pyrus communis	Favorite Morel	France	Communis	2x	1	Seedling of cultivar Bartlett
PI 264197	a550887-4349125-010319-489_P15	CPYR_467.002	26.1928	Pass		Pyrus communis	President Osmonville 40	France	Communis	2x	1
PI 295680	a550887-4349125-010319-489_P16	CPYR_327.003	23.5935	Pass		Pyrus communis	Kruidernier	Netherlands	Communis	2x	1
PI 215325	a550887-4349125-010319-489_P17	CPYR_87.003	25.46	Pass		Pyrus communis	Beurré de Mortillet	France	Communis	2x	1
PI 143977	a550887-4349125-010319-489_P18	CPYR_234.002	30.7666	Pass		Pyrus communis	Forostovsky	Former Soviet Union	Communis	2x	1
PI 278729	a550887-4349125-010319-489_P19	CPYR_510.001	11.9586	Pass		Pyrus pyrifolia	Samy's Estate	India	Group 4	2x	1
PI 324132	a550887-4349125-010319-489_P20	CPYR_391.002	25.1026	Pass		Pyrus communis	Mellina	Italy	Communis	2x	1	Butirra Clairgeau x Williams Bon Chretien (pollen tr. in magnetic field)
PI 617563	a550887-4349125-010319-489_P21	CPYR_2392.001	23.571	Pass		Pyrus communis	Earlibrite	Canada-Nova Scotia	Communis	2x	1
PI 665782	a550887-4349125-010319-489_P22	CPYR_2442.001	24.4875	Pass		Pyrus communis	Pyvert [Vert] (Genetic Dwarf)	France	Communis	2x	1	Doyenné du Comice x (Le Nain Vert x Max Red Bartlett)
PI 541503	a550887-4349125-010319-489_P23	CPYR_2107.002	27.7273	Pass		Pyrus communis	Sheldon	United States-New York	Communis	2x	1
PI 617577	a550887-4349125-010319-489_P24	CPYR_2498.001	22.5425	Pass		Pyrus communis	Mission La Purisima Pear 18-H	United States	Communis	2x	1
PI 541808	a550887-4349125-010319-490_A01	CPYR_1659.001	19.1906	Pass		Pyrus hybrid	NY 10355	United States-New York	Hybrids	2x	1	Bartlett x NY 10255
PI 541555	a550887-4349125-010319-490_A03	CPYR_2284.001	20.6059	Pass		Pyrus communis	Fiorenza	Italy	Communis	2x	1	Dr Jules Guyot x Williams Bon Chretien
PI 541075	a550887-4349125-010319-490_A05	CPYR_1439.001		Fail	QC CR	Pyrus calleryana	Autumn Blaze (P. calleryana)	United States	Group 3	2x	1
PI 541108	a550887-4349125-010319-490_A07	CPYR_2189.001		Fail	QC CR	Pyrus calleryana	Aristocrat (P. calleryana)	China	Group 3	2x	1
PI 311714	a550887-4349125-010319-490_A09	CPYR_206.001	23.1983	Pass		Pyrus communis	Eletta Morettini	Italy	Communis	2x	1	Butirra Hardy x Passe Crassane
PI 541970	a550887-4349125-010319-490_A11	CPYR_2288.001	31.5948	Pass		Pyrus communis	B-22	South Africa	Communis	2x	1	Rootstock selection
PI 541403	a550887-4349125-010319-490_A13	CPYR_1326.001	25.8747	Pass		Pyrus communis	OHxF 340	United States-Oregon	Communis	2x	1	Old Home x Bartlett
PI 540942	a550887-4349125-010319-490_A15	CPYR_649.001	6.68694	Pass		Pyrus betulifolia	P. betulifolia	United States	Group 3	2x	1
PI 541297	a550887-4349125-010319-490_A17	CPYR_723.002	23.152	Pass		Pyrus communis	P-79 fire blight resistant rootstock	United States-Oregon	Communis	2x	1	Seedling selection
PI 641292	a550887-4349125-010319-490_A19	CPYR_2835.003	14.1348	Pass		Pyrus communis subsp. caucasica	P. communis ssp. caucasica GE-2004-037 - Georgia, Aregri Valley	Georgia	Communis	2x	1	Collected in the wild in Republic of Georgia.
PI 440630	a550887-4349125-010319-490_A21	CPYR_728.001	17.3703	Pass		Pyrus communis subsp. caucasica	P. communis ssp. caucasica - Yankulyski	Russian Federation	Communis	2x	1	Seedling selection from seedlot collected in Russia
PI 542014	a550887-4349125-010319-490_A23	CPYR_1201.001	7.25306	Pass		Pyrus ussuriensis	P. ussuriensis No. 1 - Korea	United States	Group 4	2x	1	Seedling selection from seedlot collected in Korea
PI 637991	a550887-4349125-010319-490_B02	CPYR_2709.001	12.8862	Pass		Pyrus sp.	Jilin Market 99015	China	Hybrids	2x	1
PI 541642	a550887-4349125-010319-490_B04	CPYR_1242.001		Fail	QC CR	Pyrus fauriei	P. fauriei MA x P. fauriei W-6	United States-Oregon	Group 3	2x	1
PI 440629	a550887-4349125-010319-490_B06	CPYR_719.001	13.5715	Pass		Pyrus communis subsp. caucasica	P. communis ssp. caucasica - Stavropol	Russian Federation	Communis	2x	1	Seedling selection from seedlot collected in Russia
PI 657924	a550887-4349125-010319-490_B08	CPYR_2883.003	10.1761	Pass		Pyrus salicifolia	P. salicifolia GE-2006-111 - Georgia, Vashlovani	Georgia	Group 2	2x	1	Collected from the wild in the Republic of Georgia.
PI 617596	a550887-4349125-010319-490_B10	CPYR_2520.001	12.69	Pass		Pyrus korshinskyi	P. korshinskyi 94009 - Kyrgyzstan	Kyrgyzstan	Group 1	2x	1	Open pollinated seed from single tree. Pollen parent unknown (parent possibly Communis korshinskyi or regeli)
PI 688084	a550887-4349125-010319-490_B12	CPYR_2901.001	16.3026	Pass		Pyrus hybrid	P. salicifolia large fruited hybrid AM-2006-186 - Armenia, Eghegi	Armenia	Hybrids	2x	1	Collected from the wild in the Armenia.
PI 540924	a550887-4349125-010319-490_B14	CPYR_633.001	12.2809	Pass		Pyrus spinosa	P. spinosa (amygdaliformis) - Turkey	Turkey	Group 2	2x	1	Seedling selection from seedlot collected in Turkey
PI 654923	a550887-4349125-010319-490_B16	CPYR_2642.002	12.1435	Pass		Pyrus pyrifolia	Nepal 5053	Nepal	Group 4	2x	1
PI 541273	a550887-4349125-010319-490_B18	CPYR_569.001	23.5584	Pass		Pyrus communis	Thorn	United Kingdom	Communis	2x	1
PI 617630	a550887-4349125-010319-490_B20	CPYR_2560.001	26.6791	Pass		Pyrus communis	Ottawa 291 [O-291]	Canada-Ontario	Communis	2x	1	Winter Nellis x Bartlett
PI 293845	a550887-4349125-010319-490_B22	CPYR_1603.001	18.4437	Pass		Pyrus hybrid	P. elaeagrifolia hybrid - Crimea	Ukraine	Hybrids	2x	1	Seedling selection from seed collected in Crimea, Ukraine
PI 617597	a550887-4349125-010319-490_B24	CPYR_2521.001	25.2736	Pass		Pyrus korshinskyi	P. korshinskyi 94010 - Kyrgyzstan	Kyrgyzstan	Group 1	2x	1	Open pollinated seed from single tree growing in a group of P. communis and P. korshinskyi. Thus maybe hybrid or pure.
PI 541295	a550887-4349125-010319-490_C01	CPYR_716.001	18.3947	Pass		Pyrus communis subsp. pyraster	P-18 (Oregon 18) fire blight resistant rootstock	United States-Oregon	Communis	2x	1	Open-pollinated French P. communis seedling selection
PI 541572	a550887-4349125-010319-490_C03	CPYR_740.001	9.81181	Pass		Pyrus cordata	P. cordata - Turkey	Turkey	Group 1	2x	1	Seedling selection from seedlot collected in Turkey
PI 541298	a550887-4349125-010319-490_C05	CPYR_724.001	23.4379	Pass		Pyrus communis subsp. pyraster	P-87 fire blight resistant rootstock	United States-Oregon	Communis	2x	1
PI 322286	a550887-4349125-010319-490_C07	CPYR_685.001	21.123	Pass		Pyrus communis subsp. caucasica	P. communis ssp. caucasica - Ukraine	Ukraine	Communis	2x	1	Collected from the wild in the Soviet Union
PI 440629	a550887-4349125-010319-490_C09	CPYR_720.001	13.8966	Pass		Pyrus communis subsp. caucasica	P. communis ssp. caucasica - Stavropol	Russian Federation	Communis	2x	1	Seedling selection from seedlot collected in Russia
PI 137111	a550887-4349125-010319-490_C11	CPYR_1112.002	24.2465	Pass		Pyrus communis	Madame Gillekins	Belgium	Communis	2x	1
PI 540944	a550887-4349125-010319-490_C13	CPYR_654.001	6.32961	Pass		Pyrus betulifolia	OPR-111 P. betulifolia No. 2	United States	Group 3	2x	1	Seedling selection from seed collected in China by Reimer
PI 312154	a550887-4349125-010319-490_C15	CPYR_904.001	19.8086	Pass		Pyrus hybrid	P. elaeagrifolia (hybrid) - Hungary	Hungary	Hybrids	2x	1	Collected from the wild in Hungary
PI 541329	a550887-4349125-010319-490_C17	CPYR_1067.002	26.2307	Pass		Pyrus communis	Beurré Auguste	France	Communis	2x	1
PI 617671	a550887-4349125-010319-490_C19	CPYR_2616.001	35.5548	Pass		Pyrus communis	Brown's Bartlett	United States	Communis	2x	1	Seedling
PI 691228	a550887-4349125-010319-490_D02	CPYR_2978.001	20.4518	Pass		Pyrus communis	Malti	Tunisia	Communis	2x	1	Local Tunisian cultivar
PI 541401	a550887-4349125-010319-490_D04	CPYR_1324.001	26.4072	Pass		Pyrus communis	OHxF 261	United States-Oregon	Communis	2x	1	Old Home x Bartlett
PI 541440	a550887-4349125-010319-490_D06	CPYR_699.001	22.1417	Pass		Pyrus communis	P. communis	NA	Communis	2x	1
PI 300693	a550887-4349125-010319-490_D08	CPYR_38.001_07	30.5326	Pass		Pyrus communis	Bartlett	United Kingdom	Communis	2x	1
PI 260152	a550887-4349125-010319-490_D10	CPYR_48.003	26.4002	Pass		Pyrus communis	Belle Picarde	France	Communis	2x	1
PI 322036	a550887-4349125-010319-490_D12	CPYR_465.002	24.601	Pass		Pyrus communis	President Heron	France	Communis	2x	1
PI 541173	a550887-4349125-010319-490_D14	CPYR_177.004	26.5922	Pass		Pyrus communis	Docteur Desportes	France	Communis	2x	1
PI 420809	a550887-4349125-010319-490_D16	CPYR_661.001		Fail	QC CR	Pyrus calleryana	P. calleryana	Asia	Group 3	2x	1
PI 541424	a550887-4349125-010319-490_D18	CPYR_1364.001	26.1284	Pass		Pyrus communis	OHxF 266	United States-Oregon	Communis	2x	1
PI 617682	a550887-4349125-010319-490_D20	CPYR_2708.001	22.9363	Pass		Pyrus communis	Fox 16 (P. communis rootstock clone)	Italy	Communis	2x	1	Pyrus communis 'Mora' x 'Volpina' (open pollinated) Cross made in 1979.
PI 654939	a550887-4349125-010319-490_D22	CPYR_2722.001	37.8978	Pass		Pyrus hybrid	Khan Tangoo I (great pear)	Pakistan	Hybrids	2x	1
PI 691232	a550887-4349125-010319-490_D24	CPYR_2675.003	22.3393	Pass		Pyrus hybrid	Khapa - large fruited P. pashia type	Pakistan	Hybrids	2x	1
PI 541573	a550887-4349125-010319-490_E01	CPYR_741.001	9.74595	Pass		Pyrus cordata	P. cordata - Turkey	Turkey	Group 1	2x	1	Seedling selection from seedlot collected in Turkey
PI 540923	a550887-4349125-010319-490_E03	CPYR_640.001	13.2674	Pass		Pyrus spinosa	P. spinosa (amygdaliformis) - Greece	Greece	Group 2	2x	1	Seedling selection from seed collected in Greece
PI 260200	a550887-4349125-010319-490_E05	CPYR_1275.001	21.4971	Pass		Pyrus hybrid	Cherry Pear	Yugoslavia	Hybrids	2x	1
PI 541777	a550887-4349125-010319-490_E09	CPYR_1316.001	34.7323	Pass		Pyrus hybrid	Nelis x P. betulifolia	United States	Hybrids	2x	1	Nelis x P. betulaefolia seedling selection A
PI 440632	a550887-4349125-010319-490_E11	CPYR_698.001	22.5635	Pass		Pyrus communis subsp. caucasica	P. communis ssp. caucasica - Gofitskoye	Russian Federation	Communis	2x	1	Seedling selection from seedlot collected in Russia
PI 312145	a550887-4349125-010319-490_E13	CPYR_860.003	27.1681	Pass		Pyrus nivalis	P. nivalis	Netherlands	Group 1	2x	1	Uncertain, possibly collected from the wild
PI 349028	a550887-4349125-010319-490_E15	CPYR_993.001	18.5278	Pass		Pyrus communis subsp. pyraster	P. communis ssp. pyraster - Macedonia	Macedonia	Communis	2x	1	Seedling selection from wild Yugoslavian seedlot CPYR 993
PI 541374	a550887-4349125-010319-490_E17	CPYR_735.001	26.155	Pass		Pyrus communis	OHxF 361	United States-Oregon	Communis	2x	1
PI 665802	a550887-4349125-010319-490_E19	CPYR_2877.001	39.0833	Pass		Pyrus communis	Shakarok	Turkmenistan	Communis	2x	1
PI 688204	a550887-4349125-010319-490_E24	CPYR_3011.001	25.5454	Pass		Pyrus communis	Suij	United States	Communis	2x	1
PI 688093	a550887-4349125-010319-490_F02	CPYR_2700.001	24.5043	Pass		Pyrus communis	OH-11 (Pyriam) Rootstock Selection	France	Communis	2x	1	Seedling of Old Home
PI 688145	a550887-4349125-010319-490_F04	CPYR_2981.001	32.699	Pass		Pyrus sp.	Sholve	Turkmenistan	Hybrids	2x	1
PI 337439	a550887-4349125-010319-490_F06	CPYR_689.001	20.299	Pass		Pyrus communis subsp. caucasica	P. communis ssp. caucasica - Stavropol	Russian Federation	Communis	2x	1	Collected from the wild in Russia
PI 541847	a550887-4349125-010319-490_F08	CPYR_841.001	4.9045	Pass		Pyrus mamorensis	P. mamorensis - Morocco	Morocco	Group 1	2x	1	Seedling selection from seed collected in Morocco
PI 541395	a550887-4349125-010319-490_F10	CPYR_1252.001	17.9463	Pass		Pyrus communis subsp. pyraster	P. communis ssp. pyraster Olez 3 - Turkey	Turkey	Communis	2x	1	Seedling selection A from seed collected in Turkey
PI 654957	a550887-4349125-010319-490_F12	CPYR_2779.001	24.608	Pass		Pyrus communis	Severyanka Kzasroshokaya	Russian Federation	Communis	2x	1
PI 693205	a550887-4349125-010319-490_F14	CPYR_2743.001	29.6442	Pass		Pyrus communis	India pear selection	India	Communis	2x	1
PI 688107	a550887-4349125-010319-490_F16	CPYR_2641.005		Fail	QC CR	Pyrus hybrid	Nepal 1-150	Nepal	Hybrids	2x	1
PI 325930	a550887-4349125-010319-490_G01	CPYR_1391.001	5.79152	Pass		Pyrus dimorphophylla	P. dimorphophylla - Japan	Japan	Group 3	2x	1	Seedling selection from wild Japanese seedlot CPYR 942
PI 665745	a550887-4349125-010319-490_G02	CPYR_2934.004	11.0239	Pass		Pyrus ×sinkiangensis	Chinese Fragrant Pear Seedling 4	NA	Group 4	2x	1	seedling of Chinese Fragrant Peat
PI 541571	a550887-4349125-010319-490_G03	CPYR_739.001	9.3676	Pass		Pyrus cordata	P. cordata - Turkey	Turkey	Group 1	2x	1
PI 541683	a550887-4349125-010319-490_G05	CPYR_1593.001	16.3684	Pass		Pyrus hondoensis	P. hondoensis	United States	Group 4	2x	1	Seedling selection A from seedlot collected in Japan
PI 693206	a550887-4349125-010319-490_G06	CPYR_2984.001	3.78487	Pass		Pyrus communis	India NIC 19390	India	Communis	2x	1
PI 541852	a550887-4349125-010319-490_G07	CPYR_857.001	4.83864	Pass		Pyrus mamorensis	P. mamorensis - Morocco	Morocco	Group 1	2x	1	Seedling selection from seedlot collected in Morocco
PI 688185	a550887-4349125-010319-490_G08	CPYR_3013.001	9.99397	Pass		Pyrus sp.	Cyoujyu	Japan	Hybrids	2x	1
PI 540992	a550887-4349125-010319-490_G09	CPYR_1458.001	6.54961	Pass		Pyrus betulifolia	P. betulifolia OSU-1	United States	Group 3	2x	1	Seedling selection B of P. betulifolia OSU-1
PI 691244	a550887-4349125-010319-490_G11	CPYR_2867.001	22.6336	Pass		Pyrus communis	Plant de Blanc	France	Communis	2x	1
PI 541979	a550887-4349125-010319-490_G12	CPYR_1011.001	7.45905	Pass		Pyrus syriaca	P. syriaca - Iran 1970	Iran	Group 2	2x	1	Collected from the wild in Iran
PI 43183	a550887-4349125-010319-490_G13	CPYR_1063.001	26.637	Pass		Pyrus communis	Belmont	United Kingdom	Communis	2x	1
PI 665741	a550887-4349125-010319-490_G14	CPYR_2925.001	11.6713	Pass		Pyrus ussuriensis	P. ussuriensis 86-077 sdlg. C	Korea-South	Group 4	2x	1	Collected from the wild in South Korea.
PI 541674	a550887-4349125-010319-490_G15	CPYR_800.001	6.81586	Pass		Pyrus hondoensis	P. hondoensis	Japan	Group 4	2x	1	Seedling selection from seed originally collected in Japan
PI 541289	a550887-4349125-010319-490_G17	CPYR_682.001	13.9064	Pass		Pyrus communis subsp. caucasica	P. communis ssp. caucasica Mag 4 - Pyatigorsk, Russia	Russian Federation	Communis	2x	1	Seedling selection from seed collected in Russia
PI 688102	a550887-4349125-010319-490_G18	CPYR_2986.001	23.8275	Pass		Pyrus communis	Arlingham Squash	United Kingdom	Communis	2x	1
PI 123968	a550887-4349125-010319-490_G19	CPYR_374.002	26.2993	Pass		Pyrus communis	Madame Soulanges	France	Communis	2x	1
PI 617598	a550887-4349125-010319-490_G20	CPYR_2522.009	13.7228	Pass		Pyrus korshinskyi	P. korshinskyi 94011 - Kyrgyzstan	Kyrgyzstan	Group 1	2x	1	Open pollinated seed from single tree growing in a group of P. communis and P. korshinskyi. Thus maybe hybrid or pure.
PI 541733	a550887-4349125-010319-490_G21	CPYR_761.001	13.8069	Pass		Pyrus hybrid	P. dimorphophylla x P. calleryana	United States	Hybrids	2x	1	P. dimorphylla x P. calleryana
PI 637987	a550887-4349125-010319-490_G22	CPYR_2433.021	13.2492	Pass		Pyrus xerophila	P. xerophila?	China	Group 4	2x	1
PI 541567	a550887-4349125-010319-490_G23	CPYR_881.001	17.7067	Pass		Pyrus communis subsp. pyraster	P. communis ssp. pyraster No. 9	NA	Communis	2x	1
PI 665748	a550887-4349125-010319-490_G24	CPYR_2939.001	10.2238	Pass		Pyrus ussuriensis	P. ussuriensis JPN-2009-149	Japan	Group 4	2x	1	Collected from the wild in Iwate, Japan.
PI 541968	a550887-4349125-010319-490_I03	CPYR_2276.001	24.5155	Pass		Pyrus communis	Romania 138-5-22	Romania	Communis	2x	1	Cultivar selection
PI 541771	a550887-4349125-010319-490_I05	CPYR_1274.001	13.2113	Pass		Pyrus hybrid	P. betulifolia-2 x P. calleryana-2	United States	Hybrids	2x	1	P. betulaefolia-2 x P. calleryana-2
PI 300693	a550887-4349125-010319-490_I07	CPYR_38.001_05	30.5116	Pass		Pyrus communis	Bartlett	United Kingdom	Communis	2x	1
PI 691239	a550887-4349125-010319-490_I09	CPYR_2929.001	14.3702	Pass		Pyrus hybrid	India IC 20818	India	Hybrids	2x	1
PI 688126	a550887-4349125-010319-490_I10	CPYR_3003.001	18.3709	Pass		Pyrus communis	Turkmenistan No. 8	Turkmenistan	Communis	2x	1
PI 212579	a550887-4349125-010319-490_I11	CPYR_149.003	25.6225	Pass		Pyrus communis	Comte de Chambord	France	Communis	2x	1	Seedling selection
PI 369881	a550887-4349125-010319-490_I12	CPYR_986.001	15.0568	Pass		Pyrus communis subsp. pyraster	P. communis ssp. pyraster - Macedonia	Macedonia	Communis	2x	1	Seedling selection from wild Yugoslavian seedlot CPYR 986
PI 541315	a550887-4349125-010319-490_I13	CPYR_399.001	26.1872	Pass		Pyrus communis	unknown	United States-Maryland	Communis	2x	1
PI 688078	a550887-4349125-010319-490_I14	CPYR_2686.003	22.0703	Pass		Pyrus communis	Camusina di Cagliari	Italy	Communis	2x	1
PI 541738	a550887-4349125-010319-490_I15	CPYR_783.001	13.1441	Pass		Pyrus hybrid	P. fauriei x P. betulifolia-1	United States	Hybrids	2x	1	P. fauriei x P. betulaefolia-1
PI 541582	a550887-4349125-010319-490_I17	CPYR_752.001	11.9866	Pass		Pyrus cordata	P. cordata - France	United States	Group 1	2x	1	Seedling selection from seedlot collected wild in France
PI 542024	a550887-4349125-010319-490_I19	CPYR_1184.001	15.9873	Pass		Pyrus ussuriensis	Tang Li	China	Group 4	2x	1
PI 665758	a550887-4349125-010319-490_I20	CPYR_2963.004	14.8158	Pass		Pyrus spinosa	P. spinosa ALB-2011-010	Albania	Group 2	2x	1
PI 541794	a550887-4349125-010319-490_I21	CPYR_1451.001	6.72898	Pass		Pyrus hybrid	P. calleryana hybrid	United States	Hybrids	2x	1	Seedling selection
PI 377614	a550887-4349125-010319-490_I22	CPYR_984.004	19.0379	Pass		Pyrus communis subsp. pyraster	P. communis ssp. pyraster - Macedonia	Macedonia	Communis	2x	1	Collected from the wild in Yugoslavia
PI 541977	a550887-4349125-010319-490_I23	CPYR_914.001	7.76032	Pass		Pyrus syriaca	P. syriaca No. 2 - Israel	Israel	Group 2	2x	1	Seedling selection from seed collected wild from Israel
PI 541536	a550887-4349125-010319-490_I24	CPYR_2199.001	24.6921	Pass		Pyrus communis	Doyenne du Comice - Crimson Gem #2	United States-Oregon	Communis	2x	1
PI 300693	a550887-4349125-010319-490_J05	CPYR_38.001_07	30.541	Pass		Pyrus communis	Bartlett	United Kingdom	Communis	2x	1
PI 665780	a550887-4349125-010319-490_K01	CPYR_2869.001	16.5828	Pass		Pyrus ussuriensis	Mian Suan (3x?)	China	Group 4	2x	1
PI 541545	a550887-4349125-010319-490_K02	CPYR_2271.001	26.5221	Pass		Pyrus communis	Princess	United Kingdom	Communis	2x	1	o.p. seedling Louise Bonne of Jersey
PI 541074	a550887-4349125-010319-490_K03	CPYR_1438.001		Fail	dQC	Pyrus calleryana	OPR-191 P. calleryana	United States	Group 3	2x	1
PI 665791	a550887-4349125-010319-490_K04	CPYR_2653.003	12.03	Pass		Pyrus pyrifolia	VIII 55	Nepal	Group 4	2x	1
PI 541077	a550887-4349125-010319-490_K05	CPYR_1452.001	6.36324	Pass		Pyrus calleryana	P. calleryana	United States	Group 3	2x	1	Seedling selection
PI 541165	a550887-4349125-010319-490_K06	CPYR_142.005	23.3174	Pass		Pyrus communis	Colonel Wilder	California	Communis	2x	1	Seedling selection
PI 688074	a550887-4349125-010319-490_K07	CPYR_2928.001	15.26	Pass		Pyrus ussuriensis	Guan-Hong-Shieo	China	Group 4	2x	1
PI 541202	a550887-4349125-010319-490_K08	CPYR_264.002	23.2081	Pass		Pyrus communis	HW 601 (Harrow, Ontario)	Canada-Ontario	Communis	2x	1	Bartlett x Maxine second test selection
PI 541788	a550887-4349125-010319-490_K09	CPYR_1371.001	35.7777	Pass		Pyrus hybrid	Old Home x P. betulifolia-1	United States-Oregon	Hybrids	2x	1	Old Home x P. betulaefolia-1
PI 541215	a550887-4349125-010319-490_K10	CPYR_346.001	22.6014	Pass		Pyrus communis	Lemon	Former Soviet Union	Communis	2x	1
PI 541070	a550887-4349125-010319-490_K11	CPYR_1434.001	8.063	Pass		Pyrus calleryana	OPR-249 P. calleryana	United States-Oregon	Group 3	2x	1	Seedling selection
PI 541136	a550887-4349125-010319-490_K12	CPYR_62.003	31.1954	Pass		Pyrus communis	Beurré d'Angleterre	United Kingdom	Communis	2x	1
PI 541072	a550887-4349125-010319-490_K13	CPYR_1436.001		Fail	QC CR	Pyrus calleryana	OPR-177 P. calleryana	United States	Group 3	2x	1
PI 688075	a550887-4349125-010319-490_K14	CPYR_2664.004	27.695	Pass		Pyrus sp.	Shinkwalay	Pakistan	Hybrids	2x	1
PI 665772	a550887-4349125-010319-490_K15	CPYR_2990.001	13.1497	Pass		Pyrus ×bretschneideri	Ya Li seedling China source	China	Group 4	2x	1	seedling of Ya Li
PI 541544	a550887-4349125-010319-490_K16	CPYR_2270.001	26.6903	Pass		Pyrus communis	General Tottleben	United Kingdom	Communis	2x	1
PI 541059	a550887-4349125-010319-490_K17	CPYR_1270.001		Fail	dQC	Pyrus calleryana	P. calleryana OSU-9	United States	Group 3	2x	1
PI 617566	a550887-4349125-010319-490_K18	CPYR_2425.001	5.34871	Pass		Pyrus koehnei	P. koehnei - Disneyland	California	Group 3	2x	1
PI 665806	a550887-4349125-010319-490_K20	CPYR_2742.001	29.1257	Pass		Pyrus communis	India pear selection	India	Communis	2x	1
PI 540968	a550887-4349125-010319-490_K21	CPYR_1244.001	6.73318	Pass		Pyrus betulifolia	P. betulifolia OSU-3 seedling A	United States	Group 3	2x	1	Seedling selection A from P. betulifolia OSU-3
PI 300693	a550887-4349125-010319-490_K22	CPYR_38.001_06	30.5326	Pass		Pyrus communis	Bartlett	United Kingdom	Communis	2x	1
PI 688149	a550887-4349125-010319-490_K23	CPYR_2944.001	31.4897	Pass		Pyrus communis	De Cloche (3x)	France	Communis	2x	1
PI 541133	a550887-4349125-010319-490_K24	CPYR_59.002	26.0485	Pass		Pyrus communis	Beurré Clairgeau	France	Communis	2x	1
PI 541019	a550887-4349125-010319-490_M01	CPYR_675.001		Fail	QC CR	Pyrus calleryana	P. calleryana PC-7	NA	Group 3	2x	1
PI 541174	a550887-4349125-010319-490_M02	CPYR_179.002	25.3619	Pass		Pyrus communis	Dorset	United States-Massachusetts	Communis	2x	1
PI 665772	a550887-4349125-010319-490_M03	CPYR_2990.003	12.2038	Pass		Pyrus ×bretschneideri	Ya Li seedling China source	China	Group 4	2x	1	seedling of Ya Li
PI 688186	a550887-4349125-010319-490_M04	CPYR_2688.004	22.059	Pass		Pyrus communis	Camusina Precoce	Italy	Communis	2x	1
Q 39608	a550887-4349125-010319-490_M05	CPYR_2747.001	12.1954	Pass		Pyrus hybrid	India NIC 20808	India	Hybrids	2x	1
PI 483382	a550887-4349125-010319-490_M06	CPYR_1536.002	26.0345	Pass		Pyrus communis subsp. pyraster	Ananaska Ceska	Czech Republic	Communis	2x	1
PI 540943	a550887-4349125-010319-490_M07	CPYR_653.001	6.56783	Pass		Pyrus betulifolia	OPR-110 P. betulifolia No. 1	United States	Group 3	2x	1	Seedling selection from seed collected in China by Reimer
PI 285530	a550887-4349125-010319-490_M08	CPYR_304.001	24.9877	Pass		Pyrus communis	Johantorp	Sweden	Communis	2x	1
PI 541078	a550887-4349125-010319-490_M09	CPYR_1460.001	9.64926	Pass		Pyrus calleryana	P. calleryana	United States	Group 3	2x	1	Seedling selection B
PI 541977	a550887-4349125-010319-490_M11	CPYR_915.001	7.80657	Pass		Pyrus syriaca	P. syriaca No. 2 - Israel	Israel	Group 2	2x	1	Seedling selection from seed collected wild from Israel
PI 617511	a550887-4349125-010319-490_M12	CPYR_922.001	29.6176	Pass		Pyrus hybrid	P. hybrid	United States-North Dakota	Hybrids	2x	1
PI 255610	a550887-4349125-010319-490_M13	CPYR_189.003		Fail	QC CR	Pyrus communis	Doyenne Flon Aine	France	Communis	2x	1
PI 541232	a550887-4349125-010319-490_M14	CPYR_392.002	27.1023	Pass		Pyrus communis	Mendel	United States-Minnesota	Communis	2x	1
PI 541626	a550887-4349125-010319-490_M15	CPYR_1277.001	11.6167	Pass		Pyrus elaeagrifolia	P. elaeagrifolia WB-4 - Turkey	Turkey	Group 2	2x	1	Seedling selection from seedlot collected in Turkey
PI 506371	a550887-4349125-010319-490_M16	CPYR_1677.001	22.0801	Pass		Pyrus hybrid	Panajurka	Yugoslavia	Hybrids	2x	1
PI 542009	a550887-4349125-010319-490_M17	CPYR_924.001	5.64438	Pass		Pyrus ussuriensis	P. ussuriensis - China	China	Group 4	2x	1
PI 541519	a550887-4349125-010319-490_M18	CPYR_2127.002	25.233	Pass		Pyrus communis	Passe Colmar	Belgium	Communis	2x	1
PI 541580	a550887-4349125-010319-490_M19	CPYR_750.001		Fail	QC CR	Pyrus cordata	P. cordata - France	France	Group 1	2x	1
PI 541713	a550887-4349125-010319-490_M20	CPYR_255.001	31.187	Pass		Pyrus hybrid	Greisa No.1 (=Douglas?)	NA	Hybrids	2x	1	P. pyrifolia hybrid
PI 540988	a550887-4349125-010319-490_M21	CPYR_1385.001	7.02605	Pass		Pyrus betulifolia	OPR-266 P. betulifolia	United States	Group 3	2x	1	P. betulifolia No. 3 seedling selection
PI 541861	a550887-4349125-010319-490_M22	CPYR_863.001	24.5758	Pass		Pyrus nivalis	P. nivalis	United States	Group 1	2x	1	Probably a seedling selection
PI 617515	a550887-4349125-010319-490_M23	CPYR_1220.001		Fail	QC CR	Pyrus calleryana	P. calleryana PC-7 (hybrid)	United States	Group 3	2x	1
PI 293837	a550887-4349125-010319-490_M24	CPYR_2064.001	20.5891	Pass		Pyrus communis subsp. pyraster	P. communis ssp. pyraster - Crimea	Ukraine	Communis	2x	1
PI 617535	a550887-4349125-010319-490_O01	CPYR_2334.001	20.959	Pass		Pyrus communis subsp. pyraster	French Resistant - rootstock clone	United States	Communis	2x	1
PI 541252	a550887-4349125-010319-490_O02	CPYR_488.001	20.7026	Pass		Pyrus communis	Rogue Red	United States-Oregon	Communis	2x	1	(Comice x Seckel) x Farmingdale sdlg. 122
PI 305300	a550887-4349125-010319-490_O03	CPYR_1197.001	6.02693	Pass		Pyrus ussuriensis	P. ussuriensis - China (from Vavilov)	United States	Group 4	2x	1	Seedling selection from seedlot collected in China
PI 688159	a550887-4349125-010319-490_O04	CPYR_2715.003	25.8523	Pass		Pyrus communis	Onondaga (VanElverdinghe source)	United States-Connecticut	Communis	2x	1
PI 540986	a550887-4349125-010319-490_O05	CPYR_1498.001	19.1093	Pass		Pyrus betulifolia	P. betulifolia 3 No. 6	United States	Group 3	2x	1
PI 665779	a550887-4349125-010319-490_O06	CPYR_2637.002	15.6033	Pass		Pyrus pyrifolia	Hua Gua (Hua-Gai)	China	Group 4	2x	1
PI 541779	a550887-4349125-010319-490_O07	CPYR_1331.002	14.0479	Pass		Pyrus hybrid	P. dimorphophylla x P. fauriei	United States	Hybrids	2x	1	P. dimorphophylla x P. fauriei seedling A
PI 541259	a550887-4349125-010319-490_O08	CPYR_508.001	27.1023	Pass		Pyrus communis	Saint Andre	France	Communis	2x	1
PI 541436	a550887-4349125-010319-490_O09	CPYR_1466.001	18.1467	Pass		Pyrus communis subsp. pyraster	P. communis ssp. pyraster Olez 4 - Turkey	Turkey	Communis	2x	1	Seedling selection B from seed collected in Turkey
PI 312503	a550887-4349125-010319-490_O10	CPYR_2386.001	21.7634	Pass		Pyrus hybrid	Michurin Beurré Zimnaya (Winter)	Russian Federation	Hybrids	2x	1
PI 665812	a550887-4349125-010319-490_O11	CPYR_2782.001	21.8012	Pass		Pyrus communis	Moorcroft	United Kingdom-England	Communis	2x	1
PI 541671	a550887-4349125-010319-490_O12	CPYR_798.001	7.3021	Pass		Pyrus hondoensis	P. hondoensis No. 1	United States	Group 4	2x	1
PI 541051	a550887-4349125-010319-490_O13	CPYR_1253.001		Fail	QC CR	Pyrus calleryana	P. calleryana	United States	Group 3	2x	1
PI 541502	a550887-4349125-010319-490_O14	CPYR_2106.001	37.4228	Pass		Pyrus communis	Louise Bonne d'Avranches (L.B. de Jersey)	France	Communis	2x	1
PI 541613	a550887-4349125-010319-490_O15	CPYR_768.001	11.1318	Pass		Pyrus elaeagrifolia	P. elaeagrifolia Olez 2 - Turkey	Turkey	Group 2	2x	1	Seedling selection from seed collected in Turkey
PI 264192	a550887-4349125-010319-490_O16	CPYR_106.002	24.5674	Pass		Pyrus communis	Beurré Dilly	Belgium	Communis	2x	1	Seedling selection or chance seedling
PI 541050	a550887-4349125-010319-490_O17	CPYR_1245.001		Fail	QC CR	Pyrus calleryana	P. calleryana	United States	Group 3	2x	1
PI 143978	a550887-4349125-010319-490_O18	CPYR_1300.001	6.757	Pass		Pyrus ussuriensis	P. ussuriensis - Manchuria	Canada-Manitoba	Group 4	2x	1
PI 541026	a550887-4349125-010319-490_O19	CPYR_668.001		Fail	QC CR	Pyrus calleryana	P. calleryana	United States	Group 3	2x	1
PI 541263	a550887-4349125-010319-490_O20	CPYR_521.002	23.934	Pass		Pyrus communis	Senateur Belle	France	Communis	2x	1
PI 541784	a550887-4349125-010319-490_O21	CPYR_1355.001	34.1367	Pass		Pyrus hybrid	P. betulifolia-2 x P-12	United States-Oregon	Hybrids	2x	1	P. betuifolia-2 x P-12 seedling selection
PI 541120	a550887-4349125-010319-490_O22	CPYR_26.001	21.4803	Pass		Pyrus communis	Ayer	United States-Kansas	Communis	2x	1	Chance seedling
PI 541068	a550887-4349125-010319-490_O23	CPYR_1432.001		Fail	QC CR	Pyrus calleryana	OPR-193 P. calleryana	United States-Oregon	Group 3	2x	1
PI 540934	a550887-4349125-010319-490_O24	CPYR_1598.001	9.71232	Pass		Pyrus spinosa	P. spinosa (amygdaliformis) - Sardinia	Italy	Group 2	2x	1	Seedling selection A from seedlot collected in Sardinia
PI 541899	a550887-4349125-010319-491_A01	CPYR_895.001	11.9838	Pass		Pyrus pyrifolia	P. pyrifolia	United States	Group 4	2x	1
-	a550887-4349125-010319-491_A02	p06	31.8975	Pass		Pyrus communis	PÉR_DE_LA_REGINA	Italy	Communis	2x	1
PI 541615	a550887-4349125-010319-491_A03	CPYR_770.001	12.8372	Pass		Pyrus elaeagrifolia	P. elaeagrifolia WB-4 - Turkey	Turkey	Group 2	2x	1	Seedling selection from seed collected in Turkey
PI 617558	a550887-4349125-010319-491_A04	CPYR_2377.002	27.8534	Pass		Pyrus communis	Anjou - Columbia Red (Euwer Anjou)	United States-Oregon	Communis	2x	1
PI 541534	a550887-4349125-010319-491_A06	CPYR_2150.004	25.8453	Pass		Pyrus communis	Doyenne du Comice - Regal Red	United States-Oregon	Communis	2x	1	Red sport of Comice
PI 617522	a550887-4349125-010319-491_A08	CPYR_1469.001	18.3316	Pass		Pyrus elaeagrifolia	P. elaeagrifolia Olez 2 glabrous - Turkey	Turkey	Group 2	2x	1	Seedling selection C from seed collected in Turkey
PI 541158	a550887-4349125-010319-491_A10	CPYR_127.001	21.7676	Pass		Pyrus communis	Canal Pear	United States-Oregon	Communis	2x	1
-	a550887-4349125-010319-491_A12	p01	23.7602	Pass		Pyrus communis	PÉR_MAŽUCH	Italy	Communis	2x	1
PI 309922	a550887-4349125-010319-491_A13	CPYR_660.001		Fail	QC CR	Pyrus regelii	P. regelii (hybrid)	Poland	Group 2	2x	1
-	a550887-4349125-010319-491_A14	p08	21.762	Pass		Pyrus communis	PÉR_MOSCATO	Italy	Communis	2x	1
PI 688115	a550887-4349125-010319-491_A15	CPYR_2892.002	26.4507	Pass		Pyrus sachokiana	P. sachokiana GE-2006-114	Georgia	Group 2	2x	1
-	a550887-4349125-010319-491_A16	p05	31.6803	Pass		Pyrus communis	PÉR_STUER	Italy	Communis	2x	1
PI 617589	a550887-4349125-010319-491_A17	CPYR_2513.005		Fail	QC CR	Pyrus regelii	P. regelii KAZ 93-41-09 - Kazakhstan	Kazakhstan	Group 2	2x	1
PI 541670	a550887-4349125-010319-491_A18	CPYR_1208.001	13.7564	Pass		Pyrus glabra	P. glabra	United States	Group 2	2x	1	Seedling selection from seedlot collected in Turkey
PI 657921	a550887-4349125-010319-491_A19	CPYR_2849.002	13.9036	Pass		Pyrus salicifolia	P. salicifolia GE-2004-141 - Akhaltsike, Georgia	Georgia	Group 2	2x	1	Collected in the wild in Republic of Georgia.
PI 665753	a550887-4349125-010319-491_A20	CPYR_2946.001	21.9834	Pass		Pyrus communis	Beurré Crapaud	NA	Communis	2x	1
PI 637987	a550887-4349125-010319-491_A21	CPYR_2433.02	14.5846	Pass		Pyrus xerophila	P. xerophila? (P. pyrifolia or pashia or calleryana hybrid?)	China	Group 4	2x	1
-	a550887-4349125-010319-491_A22	p02	22.5817	Pass		Pyrus communis	PÉR_TEMPORIVO	Italy	Communis	2x	1
PI 324028	a550887-4349125-010319-491_A23	CPYR_1192.001	17.5231	Pass		Pyrus communis subsp. caucasica	P. communis ssp. caucasica - Stavropol	Russian Federation	Communis	2x	1	Seedling selection from seedlot collected in Russia
PI 541122	a550887-4349125-010319-491_A24	CPYR_31.003	24.601	Pass		Pyrus communis	Barillet Deschamp	France	Communis	2x	1
PI 502174	a550887-4349125-010319-491_B01	CPYR_1634.001	27.6067	Pass		Pyrus communis	Rosii Untoase	Romania	Communis	2x	1
PI 541561	a550887-4349125-010319-491_B02	CPYR_702.001	14.0283	Pass		Pyrus communis subsp. caucasica	P. communis ssp. caucasica Mag 2 - Pyatigorsk, Russia	Russian Federation	Communis	2x	1	Seedling selection from seedlot collected in Russia
PI 312154	a550887-4349125-010319-491_B04	CPYR_904.002	19.8716	Pass		Pyrus hybrid	P. elaeagrifolia (hybrid) - Hungary	Hungary	Hybrids	2x	1
PI 693207	a550887-4349125-010319-491_B05	CPYR_2627.002		Fail	QC CR	Pyrus communis	Timpurii de Dimbovita	Romania	Communis	2x	1
PI 131489	a550887-4349125-010319-491_B06	CPYR_1070.002	26.347	Pass		Pyrus communis	Beurré Madame Henre Lamy	France	Communis	2x	1	Marguerite Marillat x Clairgeau
PI 542000	a550887-4349125-010319-491_B07	CPYR_560.001	16.531	Pass		Pyrus ussuriensis	Ta Mo Pan	China	Group 4	2x	1
PI 325930	a550887-4349125-010319-491_B08	CPYR_1190.001		Fail	QC CR	Pyrus dimorphophylla	P. dimorphophylla - Japan	Japan	Group 3	2x	1
PI 617673	a550887-4349125-010319-491_B09	CPYR_2618.001	10.9328	Pass		Pyrus pyrifolia	Bou Tsu Li	NA	Group 4	2x	1
PI 392324	a550887-4349125-010319-491_B10	CPYR_704.002	23.9536	Pass		Pyrus communis	Kustendil No. 510	Bulgaria	Communis	2x	1
PI 657922	a550887-4349125-010319-491_B11	CPYR_2881.001	22.1291	Pass		Pyrus communis	Blake's Pride	United States-West Virginia	Communis	2x	1	US 446 x US 505
PI 541342	a550887-4349125-010319-491_B12	CPYR_1107.003	26.4213	Pass		Pyrus communis	Kyles Sugar	United States	Communis	2x	1
PI 541365	a550887-4349125-010319-491_B13	CPYR_21.001	27.5787	Pass		Pyrus communis	Anjou - Naumes	United States	Communis	2x	1	Productive Anjou selection from Naumes Orchard
PI 282975	a550887-4349125-010319-491_B14	CPYR_403.003	23.9382	Pass		Pyrus communis	Muskatelka Prava	Czech Republic	Communis	2x	1
PI 541898	a550887-4349125-010319-491_B15	CPYR_303.003	12.2683	Pass		Pyrus pyrifolia	Japanese Golden Russet	Japan	Group 4	2x	1
PI 127041	a550887-4349125-010319-491_B16	CPYR_1110.003	25.0312	Pass		Pyrus communis	Laxton's Satisfaction	United Kingdom	Communis	2x	1	Bartlett x Beurre Superfin
PI 541348	a550887-4349125-010319-491_B17	CPYR_1142.002	25.3997	Pass		Pyrus communis	Sierra	Canada	Communis	2x	1	Bartlett x Marguerite Marillat
PI 637999	a550887-4349125-010319-491_B18	CPYR_2791.001	27.9024	Pass		Pyrus communis	Anjou - Striped	United States-Oregon	Communis	2x	1	A green striped sport of Columbia Red Anjou
PI 541437	a550887-4349125-010319-491_B19	CPYR_1489.001	23.4884	Pass		Pyrus communis	Domestic Pear	United States	Communis	2x	1	Seedling selection from European seedlot
PI 541552	a550887-4349125-010319-491_B20	CPYR_2281.001	24.9289	Pass		Pyrus communis	Doyenne Perault	France	Communis	2x	1
PI 131123	a550887-4349125-010319-491_B21	CPYR_1075.001	24.7089	Pass		Pyrus communis	Charles Escaig	France	Communis	2x	1
PI 541766	a550887-4349125-010319-491_B22	CPYR_1232.002	10.9427	Pass		Pyrus pyrifolia	Hawaii x Japanese Golden Russet	United States	Group 4	2x	1	Hawaii x Jap. Gold. Russet
PI 255605	a550887-4349125-010319-491_B23	CPYR_11.004	23.7504	Pass		Pyrus communis	Admiral Gervais	France	Communis	2x	1
PI 540976	a550887-4349125-010319-491_B24	CPYR_1309.001	6.51178	Pass		Pyrus betulifolia	P. betulifolia	United States	Group 3	2x	1	Seedling selection from seed collected from North China
PI 638000	a550887-4349125-010319-491_C01	CPYR_2797.001	10.4634	Pass		Pyrus salicifolia	P. salicifolia ARM-02-067 - Armenia, Arpa Gorge	Armenia	Group 2	2x	1	Collected from the wild in Armenia.
PI 541710	a550887-4349125-010319-491_C02	CPYR_217.004	28.4559	Pass		Pyrus hybrid	Eureka	United States-Illinois	Hybrids	2x	1
PI 665787	a550887-4349125-010319-491_C03	CPYR_2868.001	12.2346	Pass		Pyrus pashia	Nepal 6001 [M. baccata]	Nepal	Group 4	2x	1	Collected from the wild in Nepal.
PI 541268	a550887-4349125-010319-491_C04	CPYR_550.002	26.9467	Pass		Pyrus communis	Success de la Meilleraye	France	Communis	2x	1
PI 324050	a550887-4349125-010319-491_C05	CPYR_2056.001	13.6135	Pass		Pyrus communis subsp. caucasica	P. communis ssp. caucasica - Caucasus Mts. Russia	Russian Federation	Communis	2x	1	Seedling selection from seedlot collected in Russia
-	a550887-4349125-010319-491_C06	Haploid_Williams_CIV	0.24663	Pass		Pyrus communis	Haploid Williams CIV_dec 2015	France	Communis	1x	1
PI 541848	a550887-4349125-010319-491_C07	CPYR_842.001	5.14692	Pass		Pyrus mamorensis	P. mamorensis - Morocco	Morocco	Group 1	2x	1	Seedling selection from seed collected in Morocco
-	a550887-4349125-010319-491_C08	p04	21.9638	Pass		Pyrus communis	PÉR_ŽUCHERIN	Italy	Communis	2x	1
PI 641289	a550887-4349125-010319-491_C09	CPYR_2809.001	11.7035	Pass		Pyrus hybrid	Bosarge	United States-Louisiana	Hybrids	2x	1
-	a550887-4349125-010319-491_C10	Pear_24	30.5284	Pass		Pyrus communis	Pear_24 -MP11I	United Kingdom	Communis	2x	1
PI 337437	a550887-4349125-010319-491_C11	CPYR_687.001	22.2146	Pass		Pyrus communis subsp. caucasica	P. communis ssp. caucasica - Stavropol	Russian Federation	Communis	2x	1	Collected from the wild in Russia
-	a550887-4349125-010319-491_C12	W65	0.20179	Pass		Pyrus communis	W65_diva	France	Communis	1x	1
PI 541139	a550887-4349125-010319-491_C13	CPYR_69.002	27.2662	Pass		Pyrus communis	Beurré de Nantes	France	Communis	2x	1	Chance seedling
-	a550887-4349125-010319-491_C14	Williams_CIV	30.5354	Pass		Pyrus communis	Williams CIV	United Kingdom	Communis	2x	1
PI 540983	a550887-4349125-010319-491_C15	CPYR_1380.001	6.73178	Pass		Pyrus betulifolia	OPR-261 P. betulifolia	United States-Oregon	Group 3	2x	1	P. betulifolia No. 3 seedling selection
-	a550887-4349125-010319-491_C16	Pear_31	30.5368	Pass		Pyrus communis	Pear_31 -MP11I	United Kingdom	Communis	2x	1
PI 541579	a550887-4349125-010319-491_C17	CPYR_749.001	13.5462	Pass		Pyrus cordata	P. cordata - France	France	Group 1	2x	1	Seedling selection from seedlot collected wild in France
PI 541592	a550887-4349125-010319-491_C18	CPYR_830.001	13.7985	Pass		Pyrus cossonii	P. cossonii - Russia	United States	Group 1	2x	1
-	a550887-4349125-010319-491_C19	P2928	26.4002	Pass		Pyrus sp.	Navara	Belgium	Hybrids	2x	1
PI 541680	a550887-4349125-010319-491_C20	CPYR_1236.003	17.2568	Pass		Pyrus hondoensis	P. hondoensis 117-28B x P. hondoensis OP seedling	United States	Group 4	2x	1	P. hondoensis 117-28B x P. hondoensis W-6
-	a550887-4349125-010319-491_C21	P3480	24.9387	Pass		Pyrus hybrid	PCR13A5 (hybride INRA (Pierre corneille x Wilder))	France	Hybrids	2x	1	Pierre corneille x Wilder
PI 541630	a550887-4349125-010319-491_C22	CPYR_1711.001	19.4218	Pass		Pyrus elaeagrifolia	P. elaeagrifolia hybrid - Uzbekistan	Uzbekistan	Group 2	2x	1	Open-pollinated from botanical collection
-	a550887-4349125-010319-491_C23	DH_sequenced	0.2228	Pass		Pyrus communis	DH_sequenced	France	Communis	2x	1
PI 206610	a550887-4349125-010319-491_C24	CPYR_282.002	25.4558	Pass		Pyrus communis	Hortellet	France	Communis	2x	1
PI 541349	a550887-4349125-010319-491_D01	CPYR_1143.001	24.3964	Pass		Pyrus communis	Sirrine	United States-New York	Communis	2x	1	OP seedling of cultivar Bartlett
PI 541541	a550887-4349125-010319-491_D02	CPYR_2267.003	21.1524	Pass		Pyrus communis	Laxton's Early Market	United Kingdom	Communis	2x	1	Marie Louise x Doyenne d'Ete
PI 541805	a550887-4349125-010319-491_D03	CPYR_1648.001	9.43346	Pass		Pyrus pyrifolia	Koyama Pear	United States	Group 4	2x	1	Nijusseiki x P. communis European Cultivar
PI 541725	a550887-4349125-010319-491_D04	CPYR_1115.001	25.715	Pass		Pyrus hybrid	Mandan 62-1	United States	Hybrids	2x	1
PI 541521	a550887-4349125-010319-491_D05	CPYR_2129.002		Fail	QC CR	Pyrus communis	Pierre Corneille	France	Communis	2x	1
PI 541340	a550887-4349125-010319-491_D06	CPYR_1101.001	30.5382	Pass		Pyrus communis	Bartlett - Improved	United States	Communis	2x	1
PI 541346	a550887-4349125-010319-491_D07	CPYR_1122.001	25.317	Pass		Pyrus communis	Mississippi US 3-10-5	United States	Communis	2x	1	PI 49492 x Buerre Bosc
PI 541646	a550887-4349125-010319-491_D08	CPYR_1283.001		Fail	QC CR	Pyrus fauriei	P. fauriei	Korea-South	Group 3	2x	1
PI 392318	a550887-4349125-010319-491_D09	CPYR_428.001	11.3448	Pass		Pyrus pyrifolia	Okusankichi	Japan	Group 4	2x	1	Seedling of cultivar Wasesankichi
PI 541319	a550887-4349125-010319-491_D10	CPYR_714.001	20.6578	Pass		Pyrus communis	P. communis	United States	Communis	2x	1	Seedling selection from European seedlot
PI 255612	a550887-4349125-010319-491_D11	CPYR_271.008	22.9881	Pass		Pyrus communis	Hebe	United States-South Carolina	Communis	2x	1
PI 300693	a550887-4349125-010319-491_D12	CPYR_38.001_04	30.5354	Pass		Pyrus communis	Bartlett	United Kingdom	Communis	2x	1
PI 541357	a550887-4349125-010319-491_D13	CPYR_1161.002	25.3395	Pass		Pyrus communis	Winkleman (= El Dorado?)	United States	Communis	2x	1
PI 541608	a550887-4349125-010319-491_D14	CPYR_1400.001	5.73266	Pass		Pyrus dimorphophylla	P. dimorphophylla	Japan	Group 3	2x	1	Seedling selection C from seed collected in Japan
PI 617658	a550887-4349125-010319-491_D15	CPYR_2603.001	35.6081	Pass		Pyrus hybrid	Fan-Stil	United States	Hybrids	2x	1	Unknown - possibly selection from Mexico
PI 541731	a550887-4349125-010319-491_D16	CPYR_759.001		Fail	QC CR	Pyrus hybrid	P. dimorphophylla x P. calleryana	United States	Hybrids	2x	1
PI 228017	a550887-4349125-010319-491_D17	CPYR_520.001	9.52735	Pass		Pyrus pyrifolia	Seigyoku	Japan	Group 4	2x	1	Nijiseiki x Chojuro
PI 541637	a550887-4349125-010319-491_D18	CPYR_780.001		Fail	QC CR	Pyrus fauriei	P. fauriei No. 4	Korea-South	Group 3	2x	1
PI 312151	a550887-4349125-010319-491_D19	CPYR_928.001	7.00783	Pass		Pyrus ussuriensis	P. ussuriensis - Tashkent	Uzbekistan	Group 4	2x	1	Collected from the wild in the Soviet Union
PI 131460	a550887-4349125-010319-491_D21	CPYR_1089.002	24.147	Pass		Pyrus communis	Emile d'Heyst	Belgium	Communis	2x	1
PI 352641	a550887-4349125-010319-491_D23	CPYR_294.001	12.0665	Pass		Pyrus pyrifolia	Imamura Aki	Japan	Group 4	2x	1
PI 325930	a550887-4349125-010319-491_E01	CPYR_1390.001	6.02553	Pass		Pyrus dimorphophylla	P. dimorphophylla - Japan	Japan	Group 3	2x	1	Seedling selection from wild Japanese seedlot CPYR 942
PI 541225	a550887-4349125-010319-491_E02	CPYR_372.003	24.7831	Pass		Pyrus communis	Madame Favre	France	Communis	2x	1
PI 541765	a550887-4349125-010319-491_E03	CPYR_1231.001	10.5433	Pass		Pyrus pyrifolia	Hawaii x Japanese Golden Russet	United States	Group 4	2x	1	Hawaii x Jap. Gold. Russet
PI 541214	a550887-4349125-010319-491_E04	CPYR_345.003	28.4601	Pass		Pyrus communis	Lehoux Grignon	NA	Communis	2x	1
PI 657923	a550887-4349125-010319-491_E05	CPYR_2882.003	17.6969	Pass		Pyrus sachokiana	P. sachokiana GE-2006-115 - Georgia	Georgia	Group 2	2x	1	Seed collected at research station in Republic of Georgia.
PI 541834	a550887-4349125-010319-491_E06	CPYR_823.001		Fail	QC CR	Pyrus koehnei	P. koehnei	United States	Group 3	2x	1
PI 324134	a550887-4349125-010319-491_E07	CPYR_406.001_2		Fail	QC CR	Pyrus communis	Mustafabey	Turkey	Communis	2x	1
PI 325928	a550887-4349125-010319-491_E08	CPYR_940.001		Fail	QC CR	Pyrus dimorphophylla	P. dimorphophylla Vo 27 - Japan	Japan	Group 3	2x	1
PI 617664	a550887-4349125-010319-491_E09	CPYR_2609.001	13.0067	Pass		Pyrus pyrifolia	Henderson	United States-Mississippi	Group 4	2x	1
-	a550887-4349125-010319-491_E10	Pear_460	30.5186	Pass		Pyrus communis	Pear 460 ngdna in 1xTE pH7.5	United Kingdom	Communis	2x	1
PI 540945	a550887-4349125-010319-491_E11	CPYR_655.001	6.90554	Pass		Pyrus betulifolia	OPR-113 P. betulifolia No. 4	United States	Group 3	2x	1	Seedling selection from seed collected in China by Reimer
PI 325930	a550887-4349125-010319-491_E12	CPYR_1389.001		Fail	QC CR	Pyrus dimorphophylla	P. dimorphophylla - Japan	Japan	Group 3	2x	1
PI 541978	a550887-4349125-010319-491_E13	CPYR_1010.009	8.96123	Pass		Pyrus syriaca	P. syriaca No. 2 - Iran	Iran	Group 2	2x	1
PI 617523	a550887-4349125-010319-491_E14	CPYR_1470.001	18.3232	Pass		Pyrus elaeagrifolia	P. elaeagrifolia Olez 2 glabrous - Turkey	Turkey	Group 2	2x	1	Seedling selection D from seed collected in Turkey
PI 214185	a550887-4349125-010319-491_E15	CPYR_665.001		Fail	QC CR	Pyrus calleryana	P. calleryana D6	Australia	Group 3	2x	1
PI 617505	a550887-4349125-010319-491_E16	CPYR_674.001	8.02517	Pass		Pyrus calleryana	P. calleryana PC-6	NA	Group 3	2x	1
PI 541009	a550887-4349125-010319-491_E17	CPYR_666.001	7.55153	Pass		Pyrus calleryana	P. calleryana	United States	Group 3	2x	1	Probably a seedling selection from an Asian seedlot
PI 541980	a550887-4349125-010319-491_E18	CPYR_1510.008	7.97892	Pass		Pyrus syriaca	P. syriaca No. 2 - Syria	Syria	Group 2	2x	1
PI 541792	a550887-4349125-010319-491_E19	CPYR_1449.001		Fail	QC CR	Pyrus hybrid	P. hybrid (calleryana)	United States	Hybrids	2x	1
-	a550887-4349125-010319-491_E20	p03	30.5284	Pass		Pyrus communis	PÉR Botìro de Santa Ana	Italy	Communis	2x	1
Q 26704	a550887-4349125-010319-491_E21	CPYR_2871.001	12.1562	Pass		Pyrus sp.	VIII-66 Nepal	Nepal	Hybrids	2x	1
PI 325929	a550887-4349125-010319-491_E22	CPYR_941.001		Fail	QC CR	Pyrus dimorphophylla	P. dimorphophylla Vo 28 - Japan	Japan	Group 3	2x	1
PI 688165	a550887-4349125-010319-491_E23	CPYR_3017.001	12.8792	Pass		Pyrus sp.	Jilin	United States-Oregon	Hybrids	2x	1	O.P. seedling from market fruit purchased in Antu, Jilin, China
-	a550887-4349125-010319-491_E24	p09	24.1932	Pass		Pyrus communis	PÉR_BOTIRO	Italy	Communis	2x	1
PI 483374	a550887-4349125-010319-491_F01	CPYR_1528.002	23.997	Pass		Pyrus communis subsp. pyraster	Krolewka	Poland	Communis	2x	1
PI 541405	a550887-4349125-010319-491_F03	CPYR_1572.001	24.6556	Pass		Pyrus communis	OHxF 333	United States-Oregon	Communis	2x	1	Old Home x Bartlett
PI 142477	a550887-4349125-010319-491_F05	CPYR_1149.002	23.6775	Pass		Pyrus communis	Sudduth (=Burkett)	United States	Communis	2x	1	Seedling selection
PI 657919	a550887-4349125-010319-491_F07	CPYR_2821.001	36.5498	Pass		Pyrus pyrifolia	Mishirasu	Japan	Group 4	2x	1
PI 142234	a550887-4349125-010319-491_F09	CPYR_1123.004	25.5539	Pass		Pyrus communis	Mitchell	United States	Communis	2x	1
PI 541309	a550887-4349125-010319-491_F11	CPYR_224.001	25.3493	Pass		Pyrus communis	Fertility (not 4x)	United Kingdom	Communis	2x	1	Seedling of cultivar Beurre Goubault
PI 337448	a550887-4349125-010319-491_F13	CPYR_501.001	24.877	Pass		Pyrus communis	Rousselet of Stuttgart x Dr. Jules Guyot No. IX	Russian Federation	Communis	2x	1	R. Shtutgartskii x Dr. J. Guyot
PI 541205	a550887-4349125-010319-491_F15	CPYR_276.001	23.7448	Pass		Pyrus communis	Hendre Huffcap	United Kingdom	Communis	2x	1
PI 300693	a550887-4349125-010319-491_F16	CPYR_38.001_06	30.534	Pass		Pyrus communis	Bartlett	United Kingdom	Communis	2x	1
PI 541727	a550887-4349125-010319-491_F17	CPYR_1144.001	34.7939	Pass		Pyrus hybrid	Sodak	United States-South Dakota	Hybrids	2x	1
PI 295094	a550887-4349125-010319-491_F19	CPYR_494.002	22.1908	Pass		Pyrus communis	Rotkottig Frau Ostergotland	Sweden	Communis	2x	1
PI 541351	a550887-4349125-010319-491_F21	CPYR_1146.001	23.1885	Pass		Pyrus communis	Spartlet	United States	Communis	2x	1	Chance Bartlett seedling
PI 282979	a550887-4349125-010319-491_F23	CPYR_563.003	23.8877	Pass		Pyrus communis	Talasova Zimni	Czech Republic	Communis	2x	1
PI 641274	a550887-4349125-010319-491_G01	CPYR_2350.001	24.9611	Pass		Pyrus salicifolia	P. salicifolia (hybrid) - Maikop, Russia	Former Soviet Union	Group 2	2x	1	Uncertain, selection from the wild?
PI 665770	a550887-4349125-010319-491_G02	CPYR_2975.006		Fail	dQC	Pyrus spinosa	P. spinosa ALB-2011-089b	Albania	Group 2	2x	1
PI 617624	a550887-4349125-010319-491_G03	CPYR_2552.002	15.26	Pass		Pyrus hybrid	P. hybrid KAZ 95-10-08L - Kazakhstan	Kazakhstan	Hybrids	2x	1	Probably P. regelii crossed with something else
-	a550887-4349125-010319-491_G04	p07	23.9928	Pass		Pyrus communis	PÉR_BOTIRO_D'INVERN	Italy	Communis	2x	1
PI 541953	a550887-4349125-010319-491_G05	CPYR_1697.001	24.4595	Pass		Pyrus salicifolia	P. salicifolia (hybrid) - Russia	Russian Federation	Group 2	2x	1	Collected from the wild in the Soviet Union
PI 541113	a550887-4349125-010319-491_G06	CPYR_1022.002		Fail	QC CR	Pyrus calleryana	P. calleryana f. graciliflora Morton Arboretum O.P.	United States	Group 3	2x	1
PI 657923	a550887-4349125-010319-491_G07	CPYR_2882.005	21.5181	Pass		Pyrus sachokiana	P. sachokiana GE-2006-115 - Georgia	Georgia	Group 2	2x	1	Seed collected at research station in Republic of Georgia.
PI 541849	a550887-4349125-010319-491_G09	CPYR_844.001	4.96336	Pass		Pyrus mamorensis	P. mamorensis - Morocco	Morocco	Group 1	2x	1
PI 541953	a550887-4349125-010319-491_G11	CPYR_1697.002	22.5159	Pass		Pyrus salicifolia	P. salicifolia (hybrid) - Russia	Russian Federation	Group 2	2x	1	Collected from the wild in the Soviet Union
PI 377614	a550887-4349125-010319-491_G13	CPYR_984.002	20.3046	Pass		Pyrus communis subsp. pyraster	P. communis ssp. pyraster - Macedonia	Macedonia	Communis	2x	1	Collected from the wild in Yugoslavia
PI 541635	a550887-4349125-010319-491_G19	CPYR_778.001		Fail	QC CR	Pyrus fauriei	P. fauriei OSU 69	Korea-South	Group 3	2x	1
PI 318871	a550887-4349125-010319-491_G21	CPYR_295.001	31.2389	Pass		Pyrus dimorphophylla	P. dimorphophylla - Inunashi - Japan	Japan	Group 3	2x	1
PI 541098	a550887-4349125-010319-491_G23	CPYR_2095.001		Fail	QC CR	Pyrus calleryana	OPR-220 P. calleryana	United States-Oregon	Group 3	2x	1
PI 541190	a550887-4349125-010319-491_H01	CPYR_231.002	25.1069	Pass		Pyrus communis	Fondante de Moulins Lille	France	Communis	2x	1	Seedling of cultivar Napoleon
PI 617677	a550887-4349125-010319-491_H03	CPYR_2622.001	24.4805	Pass		Pyrus communis	Yungen	NA	Communis	2x	1
PI 617573	a550887-4349125-010319-491_H05	CPYR_2456.001	32.1357	Pass		Pyrus communis	Carrick	United States-Tennessee	Communis	2x	1	Seckel x Garber
PI 292507	a550887-4349125-010319-491_H07	CPYR_396.002	30.5256	Pass		Pyrus communis	Bartlett - Sensation Red	Australia	Communis	2x	1	Probably a Bartlett bud mutation
PI 541362	a550887-4349125-010319-491_H09	CPYR_186.004	27.5367	Pass		Pyrus communis	Doyenne de Saumur	France	Communis	2x	1
PI 295097	a550887-4349125-010319-491_H11	CPYR_574.003	24.8658	Pass		Pyrus communis	Tirelemont	Belgium	Communis	2x	1
PI 541269	a550887-4349125-010319-491_H13	CPYR_553.002	25.9294	Pass		Pyrus communis	Sucre Verte	France	Communis	2x	1
PI 665800	a550887-4349125-010319-491_H15	CPYR_2693.003	23.5991	Pass		Pyrus communis	Etrusca	Italy	Communis	2x	1	Coscia x Gentile
PI 541707	a550887-4349125-010319-491_H17	CPYR_138.001	36.1434	Pass		Pyrus hybrid	Cincincis	France	Hybrids	2x	1
PI 693208	a550887-4349125-010319-491_H19	CPYR_2671.002	20.4237	Pass		Pyrus communis	Frashishi	Pakistan	Communis	2x	1
PI 688146	a550887-4349125-010319-491_H21	CPYR_2781.001	37.8095	Pass		Pyrus hybrid	India IC 20821	India	Hybrids	2x	1
PI 637987	a550887-4349125-010319-491_H22	CPYR_2433.017	12.5779	Pass		Pyrus xerophila	P. xerophila? (P. bretschneideri like)	China	Group 4	2x	1
PI 506380	a550887-4349125-010319-491_H23	CPYR_1671.001	19.0407	Pass		Pyrus communis subsp. pyraster	P. communis ssp. pyraster - Romania	Romania	Communis	2x	1
PI 617516	a550887-4349125-010319-491_I01	CPYR_1281.001		Fail	QC CR	Pyrus fauriei	P. fauriei - Korea (Morton Arboretum)	Korea-South	Group 3	2x	1
PI 541689	a550887-4349125-010319-491_I03	CPYR_2117.002	14.8789	Pass		Pyrus hondoensis	P. hondoensis - Japan	Japan	Group 4	2x	1
PI 541678	a550887-4349125-010319-491_I05	CPYR_807.001	6.45573	Pass		Pyrus hondoensis	P. hondoensis	United States	Group 4	2x	1	Seedling selection from seed collected in Japan
PI 541636	a550887-4349125-010319-491_I07	CPYR_2.006		Fail	QC CR	Pyrus fauriei	P. fauriei - Korea OP seedling	Korea-South	Group 3	2x	1
PI 688143	a550887-4349125-010319-491_I09	CPYR_2630.004	22.5383	Pass		Pyrus communis	Romania 8/102 F2-25-6	Romania	Communis	2x	1
PI 541094	a550887-4349125-010319-491_I11	CPYR_2091.001		Fail	QC CR	Pyrus calleryana	OPR-138 P. calleryana	United States-Oregon	Group 3	2x	1
PI 641301	a550887-4349125-010319-491_I13	CPYR_2845.001		Fail	QC CR	Pyrus communis subsp. caucasica	P. communis ssp. caucasica GE-2004-136 - Georgia, Kharagauli	Georgia	Communis	2x	1
PI 541927	a550887-4349125-010319-491_I15	CPYR_1018.001		Fail	QC CR	Pyrus pyrifolia	P. pyrifolia from A. Donovan house	United States	Group 4	2x	1
PI 541606	a550887-4349125-010319-491_I17	CPYR_1393.001		Fail	QC CR	Pyrus dimorphophylla	P. dimorphophylla	Japan	Group 3	2x	1
PI 617521	a550887-4349125-010319-491_I19	CPYR_1467.001	20.4139	Pass		Pyrus communis subsp. pyraster	P. communis ssp. pyraster Olez 3 - Turkey	Turkey	Communis	2x	1	Seedling selection B from seed collected in Turkey
PI 540943	a550887-4349125-010319-491_I21	CPYR_657.001	6.74439	Pass		Pyrus betulifolia	P. betulifolia	United States	Group 3	2x	1	Seedling selection from seed collected in China by Reimer
PI 665766	a550887-4349125-010319-491_I22	CPYR_2971.004	11.164	Pass		Pyrus spinosa	P. spinosa ALB-2011-067	Albania	Group 2	2x	1
PI 637987	a550887-4349125-010319-491_I23	CPYR_2433.018	10.846	Pass		Pyrus xerophila	P. xerophila? (P. pashia like foliage)	China	Group 4	2x	1
PI 541390	a550887-4349125-010319-491_J01	CPYR_1235.001	23.8975	Pass		Pyrus communis	Unknown Bergamotte Type Cv.	United States	Communis	2x	1
PI 617623	a550887-4349125-010319-491_J02	CPYR_2551.004	23.3412	Pass		Pyrus hybrid	P. hybrid KAZ 95-05-04 - Kazakhstan	Kazakhstan	Hybrids	2x	1
PI 654961	a550887-4349125-010319-491_J03	CPYR_2770.001	25.4614	Pass		Pyrus sp.	Tara Mrut [William Feldman]	Turkmenistan	Hybrids	2x	1
PI 665745	a550887-4349125-010319-491_J04	CPYR_2934.003	12.7447	Pass		Pyrus ×sinkiangensis	Chinese Fragrant Pear Seedling 3	NA	Group 4	2x	1	seedling of Chinese Fragrant Peat
PI 617571	a550887-4349125-010319-491_J05	CPYR_2454.001	25.1265	Pass		Pyrus communis	Enie	Canada-Ontario	Communis	2x	1	Zuckerbirne x Clapp Favorite
PI 617623	a550887-4349125-010319-491_J06	CPYR_2551.006	24.0881	Pass		Pyrus hybrid	P. communis hybrid KAZ 95-05-04 - Kazakhstan	Kazakhstan	Hybrids	2x	1
PI 541270	a550887-4349125-010319-491_J07	CPYR_559.001		Fail	dQC	Pyrus communis	Suzette de Bavay	Belgium	Communis	2x	1
PI 665745	a550887-4349125-010319-491_J08	CPYR_2934.005	9.21066	Pass		Pyrus ×sinkiangensis	Chinese Fragrant Pear Seedling 5	NA	Group 4	2x	1	seedling of Chinese Fragrant Peat
PI 688131	a550887-4349125-010319-491_J10	CPYR_2987.001	23.2599	Pass		Pyrus communis	Oldfield	United Kingdom	Communis	2x	1
PI 541517	a550887-4349125-010319-491_J11	CPYR_2125.001	26.0779	Pass		Pyrus communis	President Deviolaine	NA	Communis	2x	1
PI 617625	a550887-4349125-010319-491_J12	CPYR_2553.001	18.5012	Pass		Pyrus hybrid	P. hybrid KAZ 95-10-11F - Kazakhstan	Kazakhstan	Hybrids	2x	1	Probably P. regelii crossed with something else
PI 654941	a550887-4349125-010319-491_J13	CPYR_2752.001	22.9685	Pass		Pyrus hybrid	SIM 103-1 - Canada	Canada	Hybrids	2x	1
PI 688187	a550887-4349125-010319-491_J14	CPYR_2702.001	22.8718	Pass		Pyrus communis	96.FI.14 (P. communis rootstock clone)	France	Communis	2x	1
PI 693209	a550887-4349125-010319-491_J15	CPYR_2767.001	10.5839	Pass		Pyrus pyrifolia	Kiyosumi	Japan	Group 4	2x	1
PI 688076	a550887-4349125-010319-491_J16	CPYR_2665.003	37.8824	Pass		Pyrus hybrid	Kharnak II (donkey pear)	Pakistan	Hybrids	2x	1
PI 278731	a550887-4349125-010319-491_J17	CPYR_533.001	11.9698	Pass		Pyrus pyrifolia	Sivaganga Estate	India	Group 4	2x	1
PI 665795	a550887-4349125-010319-491_J18	CPYR_2679.002	26.6875	Pass		Pyrus communis	TE-1839 (Czech Republic)	Czech Republic	Communis	2x	1	Clapp Favorite x Beurre Bosc
PI 541431	a550887-4349125-010319-491_J19	CPYR_1404.001	24.9513	Pass		Pyrus communis	Harrow Delight (HW 603)	Canada-Ontario	Communis	2x	1
PI 541128	a550887-4349125-010319-491_J20	CPYR_52.002	23.9157	Pass		Pyrus communis	Bergamote d'Ete	NA	Communis	2x	1
PI 654940	a550887-4349125-010319-491_J22	CPYR_2741.001	24.4679	Pass		Pyrus communis	Sarteau Rogue	France	Communis	2x	1
PI 541550	a550887-4349125-010319-491_J23	CPYR_2279.001	24.353	Pass		Pyrus communis	Remy Chatenay	France	Communis	2x	1
PI 541233	a550887-4349125-010319-491_J24	CPYR_393.003	25.2133	Pass		Pyrus communis	Messire Jean	France	Communis	2x	1
PI 143978	a550887-4349125-010319-491_K01	CPYR_1139.001	8.32644	Pass		Pyrus ussuriensis	P. ussuriensis - Manchuria	Canada	Group 4	2x	1	Possibly a seedling selection from a Chinese seedlot
PI 541286	a550887-4349125-010319-491_K02	CPYR_619.001	24.7411	Pass		Pyrus communis	Worden Seckle	United States-New York	Communis	2x	1	Seedling of cultivar Seckel
PI 541929	a550887-4349125-010319-491_K03	CPYR_1606.001	12.7237	Pass		Pyrus pyrifolia	P. pyrifolia	United States	Group 4	2x	1	Seedling selection from seedlot collected in Pakistan
PI 541314	a550887-4349125-010319-491_K04	CPYR_398.001	28.6535	Pass		Pyrus communis	Mooers	United States-Tennessee	Communis	2x	1
PI 541004	a550887-4349125-010319-491_K05	CPYR_2101.001	5.4468	Pass		Pyrus betulifolia	P. betulifolia	United States	Group 3	2x	1	Seedling selection #4 from P. betulifolia-3 from China
PI 693210	a550887-4349125-010319-491_K06	CPYR_2659.003	25.7627	Pass		Pyrus hybrid	Sur Tangoo (red pear)	Pakistan	Hybrids	2x	1
PI 541610	a550887-4349125-010319-491_K07	CPYR_757.001		Fail	QC CR	Pyrus dimorphophylla	P. dimorphophylla - Japan	Japan	Group 3	2x	1
PI 541509	a550887-4349125-010319-491_K08	CPYR_2115.001	25.1909	Pass		Pyrus communis	Bosc - Gebhard Russetless	United States-Oregon	Communis	2x	1	Sport of cultivar Beurre Bosc
PI 540948	a550887-4349125-010319-491_K09	CPYR_651.001	6.55522	Pass		Pyrus betulifolia	P. betulifolia	United States	Group 3	2x	1	Seedling selection from seed collected in Japan
PI 617605	a550887-4349125-010319-491_K10	CPYR_2530.002	30.5046	Pass		Pyrus communis	Bartlett - Low Chill from S. Africa	South Africa	Communis	2x	1	Presumably - low chill sport of Bartlett
PI 541076	a550887-4349125-010319-491_K11	CPYR_1440.001	6.8579	Pass		Pyrus calleryana	OPR-195 P. calleryana 6 OP	United States	Group 3	2x	1	Seedling selection
PI 483385	a550887-4349125-010319-491_K12	CPYR_1539.001	18.3569	Pass		Pyrus communis subsp. pyraster	P. communis ssp. pyraster - Poland	Poland	Communis	2x	1	Chance seedling
PI 313932	a550887-4349125-010319-491_K13	CPYR_390.001	23.3244	Pass		Pyrus elaeagrifolia	P. elaeagrifolia (hybrid)	Russian Federation	Group 2	2x	1	Collected from the wild in the Soviet Union
PI 541249	a550887-4349125-010319-491_K14	CPYR_478.001	30.5396	Pass		Pyrus communis	Bartlett - Max Red	United States-Washington	Communis	2x	1	Bartlett bud mutation
PI 541799	a550887-4349125-010319-491_K15	CPYR_1479.001	17.9729	Pass		Pyrus hybrid	P. ussuriensis x P. calleryana	United States	Hybrids	2x	1	P. ussuriensis x P. calleryana seedling selection B
PI 420810	a550887-4349125-010319-491_K16	CPYR_102.001	29.1482	Pass		Pyrus communis	BP-2 (Bien Donne 2)	South Africa	Communis	2x	1
PI 325929	a550887-4349125-010319-491_K17	CPYR_941.002		Fail	QC CR	Pyrus dimorphophylla	P. dimorphophylla Vo 28 - Japan	Japan	Group 3	2x	1
PI 688158	a550887-4349125-010319-491_K18	CPYR_2783.001	23.3188	Pass		Pyrus communis	Beth	United Kingdom-England	Communis	2x	1	Beurré Superfin x William's Bon Chretien
PI 541827	a550887-4349125-010319-491_K19	CPYR_812.001		Fail	QC CR	Pyrus koehnei	P. koehnei	United States	Group 3	2x	1
PI 324032	a550887-4349125-010319-491_K20	CPYR_1193.001	16.6585	Pass		Pyrus communis subsp. caucasica	P. communis ssp. caucasica - Stavropol	Russian Federation	Communis	2x	1	Seedling selection from seedlot collected in Russia
PI 312150	a550887-4349125-010319-491_K21	CPYR_927.001	5.8798	Pass		Pyrus ussuriensis	P. ussuriensis - Alma-ata	Kazakhstan	Group 4	2x	1	Collected from the wild in the Soviet Union
PI 300693	a550887-4349125-010319-491_K22	CPYR_38.001_02	30.541	Pass		Pyrus communis	Bartlett	United Kingdom	Communis	2x	1
PI 541061	a550887-4349125-010319-491_K23	CPYR_1272.001		Fail	dQC	Pyrus calleryana	P. calleryana	United States	Group 3	2x	1
PI 307539	a550887-4349125-010319-491_K24	CPYR_83.002	21.343	Pass		Pyrus communis	Beurré Inflancka	NA	Communis	2x	1
PI 691240	a550887-4349125-010319-491_L01	CPYR_3002.001	11.9992	Pass		Pyrus pyrifolia	India IC 20804	India	Group 4	2x	1
PI 688157	a550887-4349125-010319-491_L02	CPYR_2685.003	21.8993	Pass		Pyrus communis	Camusina di Bonarcado	Italy	Communis	2x	1
PI 282980	a550887-4349125-010319-491_L03	CPYR_579.002	27.2438	Pass		Pyrus communis	Toulouska pozdni	Czech Republic	Communis	2x	1
PI 260150	a550887-4349125-010319-491_L04	CPYR_14.001	28.7712	Pass		Pyrus communis	Alliance Franco-Russe	France	Communis	2x	1	Seedling selection
PI 665789	a550887-4349125-010319-491_L05	CPYR_2651.002	10.8488	Pass		Pyrus pyrifolia	Atago	Japan	Group 4	2x	1
PI 540991	a550887-4349125-010319-491_L07	CPYR_1443.001	6.79904	Pass		Pyrus betulifolia	P. betulifolia	United States	Group 3	2x	1	Seedling selection of P. betulifolia-3 from Asian seedlot
PI 541522	a550887-4349125-010319-491_L09	CPYR_2130.001	23.3622	Pass		Pyrus communis	Charles Ernest	France	Communis	2x	1
PI 541664	a550887-4349125-010319-491_L10	CPYR_790.001	23.6789	Pass		Pyrus gharbiana	P. gharbiana No. 4	Morocco	Group 1	2x	1
PI 282973	a550887-4349125-010319-491_L11	CPYR_351.003	25.6365	Pass		Pyrus communis	Lezinova	Czech Republic	Communis	2x	1
PI 617679	a550887-4349125-010319-491_L12	CPYR_2699.003	24.3838	Pass		Pyrus communis	BU 2/33 - Pyro II (P. communis rootstock clone)	Germany	Communis	2x	1	Old Home x Bonne Luise d'Avranches
PI 541605	a550887-4349125-010319-491_L13	CPYR_1392.001		Fail	QC CR	Pyrus dimorphophylla	P. dimorphophylla	Japan	Group 3	2x	1
PI 541543	a550887-4349125-010319-491_L14	CPYR_2269.001	26.6174	Pass		Pyrus communis	Laxton's Superb	United Kingdom	Communis	2x	1	Buerre Superfin x William's Bon Chretien (Bartlett)
PI 541604	a550887-4349125-010319-491_L15	CPYR_1313.001	10.8978	Pass		Pyrus dimorphophylla	P. dimorphophylla x self	United States	Group 3	2x	1	P. dimorphophylla x self seedling selection
PI 665778	a550887-4349125-010319-491_L16	CPYR_2853.001	31.0441	Pass		Pyrus ussuriensis	Chiao-Ma	China	Group 4	2x	1
PI 541272	a550887-4349125-010319-491_L17	CPYR_568.002	24.7257	Pass		Pyrus communis	Tedrow Beauty	NA	Communis	2x	1
PI 541843	a550887-4349125-010319-491_L18	CPYR_834.001	5.14692	Pass		Pyrus mamorensis	P. mamorensis - Morocco	Morocco	Group 1	2x	1	Seedling selection from seedlot collected in Morocco
PI 541602	a550887-4349125-010319-491_L19	CPYR_1223.001		Fail	QC CR	Pyrus dimorphophylla	P. dimorphophylla 407-1	Japan	Group 3	2x	1
PI 617631	a550887-4349125-010319-491_L21	CPYR_2561.001	34.7323	Pass		Pyrus hybrid	Peter	Canada-Saskatchewan	Hybrids	2x	1	Pyrus ussuriensis x Aspa
PI 665756	a550887-4349125-010319-491_L22	CPYR_2957.001	30.5298	Pass		Pyrus communis	Bartlett - John Muir Gravesite No. 85	California	Communis	2x	1
PI 541201	a550887-4349125-010319-491_L23	CPYR_262.001	20.8133	Pass		Pyrus communis	H.E.S. 25021 (Harrow Experiment Station)	Canada	Communis	2x	1
PI 638011	a550887-4349125-010319-491_L24	CPYR_2819.001	24.0236	Pass		Pyrus pyrifolia	Hamesi	NA	Group 4	2x	1
PI 541632	a550887-4349125-010319-491_M01	CPYR_772.004		Fail	QC CR	Pyrus fauriei	P. fauriei	Korea-South	Group 3	2x	1
PI 541181	a550887-4349125-010319-491_M02	CPYR_199.001	26.2979	Pass		Pyrus communis	Duchesse de Brissac	France	Communis	2x	1	Seedling selection
PI 541826	a550887-4349125-010319-491_M03	CPYR_809.001		Fail	QC CR	Pyrus koehnei	P. koehnei	United States	Group 3	2x	1
PI 540972	a550887-4349125-010319-491_M04	CPYR_1262.001	6.36324	Pass		Pyrus betulifolia	P. betulifolia	United States	Group 3	2x	1	Seedling selection from Asian seedlot
PI 541979	a550887-4349125-010319-491_M05	CPYR_1011.005	6.38566	Pass		Pyrus syriaca	P. syriaca - Iran	Iran	Group 2	2x	1
PI 540977	a550887-4349125-010319-491_M06	CPYR_1310.002	6.12082	Pass		Pyrus betulifolia	P. betulifolia	United States	Group 3	2x	1	Seedling selection from seed collected from North China
PI 541118	a550887-4349125-010319-491_M08	CPYR_201.001	27.838	Pass		Pyrus communis	Anjou - Dwarf	United States	Communis	2x	1
PI 541308	a550887-4349125-010319-491_M10	CPYR_208.001	30.534	Pass		Pyrus communis	Bartlett - Eller	United States-Washington	Communis	2x	1	Early ripening sport of Bartlett
PI 541224	a550887-4349125-010319-491_M12	CPYR_370.001	24.9247	Pass		Pyrus communis	Madame Andre Leroy	France	Communis	2x	1	Seedling selection
PI 352632	a550887-4349125-010319-491_M14	CPYR_146.002	25.8551	Pass		Pyrus communis	Doyenne du Comice - Spur	United States	Communis	2x	1	Spur or bud mutation of cultivar Comice
PI 541670	a550887-4349125-010319-491_M16	CPYR_1206.001	16.8631	Pass		Pyrus glabra	P. glabra	United States	Group 2	2x	1
PI 541976	a550887-4349125-010319-491_M18	CPYR_913.001	8.18211	Pass		Pyrus syriaca	P. syriaca - Israel	Israel	Group 2	2x	1	Seedling selection from seed collected in Israel
PI 617553	a550887-4349125-010319-491_M20	CPYR_2370.001	22.3575	Pass		Pyrus communis	Cedar Lane Farm 3	United States	Communis	2x	1
PI 541314	a550887-4349125-010319-491_M21	CPYR_398.001_2	28.6269	Pass		Pyrus communis	Mooers	United States-Tennessee	Communis	2x	1
PI 141256	a550887-4349125-010319-491_M22	CPYR_1652.001	26.4465	Pass		Pyrus communis	Madame Treyve	France	Communis	2x	1	Seedling selection
PI 541118	a550887-4349125-010319-491_M23	CPYR_201.001_2	27.8239	Pass		Pyrus communis	Anjou - Dwarf	United States	Communis	2x	1
PI 541666	a550887-4349125-010319-491_M24	CPYR_794.001	4.21227	Pass		Pyrus gharbiana	P. gharbiana	Morocco	Group 1	2x	1	Seedling selection from seed collected wild in Morocco
PI 638014	a550887-4349125-010319-491_N01	CPYR_2824.001	28.519	Pass		Pyrus communis	Waverly	United States-Oregon	Communis	2x	1
PI 541121	a550887-4349125-010319-491_N02	CPYR_28.002	30.5242	Pass		Pyrus communis	Bartlett - Bagley Russet	United States	Communis	2x	1
PI 688136	a550887-4349125-010319-491_N03	CPYR_2948.001	30.5284	Pass		Pyrus communis	Mission San Carlos Pear 1	United States	Communis	2x	1
Q 44751	a550887-4349125-010319-491_N04	CPYR_2891.001	30.5298	Pass		Pyrus communis	Sulani	Georgia	Communis	2x	1
PI 541645	a550887-4349125-010319-491_N05	CPYR_1282.001		Fail	QC CR	Pyrus fauriei	P. fauriei x self	United States	Group 3	2x	1
PI 541192	a550887-4349125-010319-491_N07	CPYR_236.002	24.7089	Pass		Pyrus communis	Frederick Clapp	United States-Massachusetts	Communis	2x	1	Urbaniste x Beurre Superfin
PI 541151	a550887-4349125-010319-491_N09	CPYR_95.001	25.523	Pass		Pyrus communis	Blakeney Red	United Kingdom	Communis	2x	1
PI 483386	a550887-4349125-010319-491_N11	CPYR_1540.001	23.6215	Pass		Pyrus communis subsp. pyraster	P. communis ssp. pyraster - Poland	Poland	Communis	2x	1	Chance seedling
PI 541336	a550887-4349125-010319-491_N13	CPYR_1087.002	28.8006	Pass		Pyrus communis	Duchesse d'Angouleme Bronzee	France	Communis	2x	1
PI 641295	a550887-4349125-010319-491_N14	CPYR_2838.002	14.9601	Pass		Pyrus communis subsp. caucasica	P. communis ssp. caucasica GE-2004-051 - Georgia, Barisakho	Georgia	Communis	2x	1	Collected in the wild in Republic of Georgia.
PI 440629	a550887-4349125-010319-491_N15	CPYR_718.001	14.7976	Pass		Pyrus communis subsp. caucasica	P. communis ssp. caucasica - Stavropol	Russian Federation	Communis	2x	1	Seedling selection from seedlot collected in Russia
PI 638006	a550887-4349125-010319-491_N16	CPYR_2814.001	13.6219	Pass		Pyrus communis subsp. caucasica	P. communis ssp. caucasica - Armenia, Spitaki-3	Armenia	Communis	2x	1	Collected from the wild in Armenia.
PI 541670	a550887-4349125-010319-491_N17	CPYR_1207.001	19.6544	Pass		Pyrus glabra	P. glabra	United States	Group 2	2x	1	Seedling selection from seedlot collected in Turkey
PI 641296	a550887-4349125-010319-491_N18	CPYR_2839.003	13.7985	Pass		Pyrus communis subsp. caucasica	P. communis ssp. caucasica GE-2004-068 - Georgia, Bakuriani	Georgia	Communis	2x	1	Collected in the wild in Republic of Georgia.
PI 541739	a550887-4349125-010319-491_N19	CPYR_784.001	13.6023	Pass		Pyrus hybrid	P. fauriei x P. betulifolia-1	United States	Hybrids	2x	1	P. fauriei x P. betulaefolia-1
PI 617626	a550887-4349125-010319-491_N20	CPYR_2554.004		Fail	QC CR	Pyrus regelii	P. regelii KAZ 95-18-16 - Kazakhstan	Kazakhstan	Group 2	2x	1
PI 541394	a550887-4349125-010319-491_N21	CPYR_1251.002	16.7846	Pass		Pyrus communis	P. communis - France	United States	Communis	2x	1	Seedling selection from seed collected in France
PI 541737	a550887-4349125-010319-491_N22	CPYR_781.007	15.6692	Pass		Pyrus hybrid	P. betulifolia hybrid OP seedling	NA	Hybrids	2x	1	Collected in Oregon
PI 541027	a550887-4349125-010319-491_N23	CPYR_672.002	14.9097	Pass		Pyrus calleryana	P. calleryana (hybrid)	United States	Group 3	2x	1
PI 665767	a550887-4349125-010319-491_N24	CPYR_2972.003	11.3504	Pass		Pyrus spinosa	P. spinosa ALB-2011-070	Albania	Group 2	2x	1
PI 665753	a550887-4349125-010319-491_O01	CPYR_2946.001_2	21.9049	Pass		Pyrus communis	Beurré Crapaud	NA	Communis	2x	1
PI 541609	a550887-4349125-010319-491_O02	CPYR_1457.001		Fail	QC CR	Pyrus dimorphophylla	P. dimorphophylla	Japan	Group 3	2x	1
PI 541670	a550887-4349125-010319-491_O03	CPYR_1206.001_2	16.8238	Pass		Pyrus glabra	P. glabra	United States	Group 2	2x	1
PI 112064	a550887-4349125-010319-491_O04	CPYR_2368.001	17.0971	Pass		Pyrus hybrid	Garber Seedling	United States	Hybrids	2x	1
PI 141256	a550887-4349125-010319-491_O05	CPYR_1652.001_2	26.4339	Pass		Pyrus communis	Madame Treyve	France	Communis	2x	1
PI 349021	a550887-4349125-010319-491_O06	CPYR_637.001	12.606	Pass		Pyrus spinosa	P. spinosa (amygdaliformis) - Macedonia (pure)	Macedonia	Group 2	2x	1	Seedling selection from seedlot collected in Yugoslavia
PI 206610	a550887-4349125-010319-491_O07	CPYR_282.002_2	25.46	Pass		Pyrus communis	Hortellet	France	Communis	2x	1
PI 540931	a550887-4349125-010319-491_O08	CPYR_642.001	13.5658	Pass		Pyrus spinosa	P. spinosa (amygdaliformis) - Greece	Greece	Group 2	2x	1	Seedling selection from seed collected in Greece
PI 541190	a550887-4349125-010319-491_O09	CPYR_231.002_2	25.0998	Pass		Pyrus communis	Fondante de Moulins Lille	France	Communis	2x	1
PI 541344	a550887-4349125-010319-491_O10	CPYR_1118.002	30.5298	Pass		Pyrus communis	Bartlett - Max Red 4x? (not 4x)	United States	Communis	2x	1	Bartlett bud mutation
PI 541225	a550887-4349125-010319-491_O11	CPYR_372.003_2	24.7677	Pass		Pyrus communis	Madame Favre	France	Communis	2x	1
PI 541707	a550887-4349125-010319-491_O13	CPYR_138.001_2	36.0005	Pass		Pyrus hybrid	Cincincis	France	Hybrids	2x	1
PI 324126	a550887-4349125-010319-491_O14	CPYR_112.001	24.3432	Pass		Pyrus communis	Butirra di Roma	Italy	Communis	2x	1	Butirra Clairgeau x Williams Bon Chretien (magnetic pollen)
PI 541270	a550887-4349125-010319-491_O15	CPYR_559.001_2	25.8818	Pass		Pyrus communis	Suzette de Bavay	Belgium	Communis	2x	1
PI 352660	a550887-4349125-010319-491_O16	CPYR_572.001	25.324	Pass		Pyrus communis	Timpurii de Voinsati	Romania	Communis	2x	1
PI 541052	a550887-4349125-010319-491_O17	CPYR_1254.001		Fail	dQC	Pyrus calleryana	P. calleryana	United States	Group 3	2x	1
PI 617529	a550887-4349125-010319-491_O18	CPYR_2297.001	23.0372	Pass		Pyrus communis	Stacey	United States-Maine	Communis	2x	1	Chance seedling
PI 541007	a550887-4349125-010319-491_O19	CPYR_2291.003	6.3184	Pass		Pyrus betulifolia	P. betulifolia - Shaanxi, China	China	Group 3	2x	1	Collected from the wild in China
PI 637986	a550887-4349125-010319-491_O20	CPYR_2376.001	25.1993	Pass		Pyrus communis	Bosc - Golden Russet	United States-Oregon	Communis	2x	1	Sport of cultivar Beurre Bosc
PI 300693	a550887-4349125-010319-491_O21	CPYR_38.001_03	30.5214	Pass		Pyrus communis	Bartlett	United Kingdom	Communis	2x	1
PI 617534	a550887-4349125-010319-491_O22	CPYR_2331.001	24.2254	Pass		Pyrus communis	Fame	NA	Communis	2x	1
PI 300693	a550887-4349125-010319-491_O23	CPYR_38.001_03	30.5298	Pass		Pyrus communis	Bartlett	United Kingdom	Communis	2x	1
PI 131743	a550887-4349125-010319-491_O24	CPYR_2367.001	34.4604	Pass		Pyrus communis	Professor Molon	Italy	Communis	2x	1	Le Lectier x Passe Crassane
PI 307540	a550887-4349125-010319-491_P01	CPYR_91.003	23.5122	Pass		Pyrus communis	Beurré Slucka	NA	Communis	2x	1
PI 541676	a550887-4349125-010319-491_P03	CPYR_803.001	9.30034	Pass		Pyrus hondoensis	P. hondoensis	United States	Group 4	2x	1
PI 693211	a550887-4349125-010319-491_P04	CPYR_3001.001	12.0483	Pass		Pyrus communis	India IC 19392B	India	Communis	2x	1
PI 541644	a550887-4349125-010319-491_P05	CPYR_1280.003		Fail	QC CR	Pyrus fauriei	P. fauriei	Korea-South	Group 3	2x	1
PI 324027	a550887-4349125-010319-491_P06	CPYR_2037.001	13.6135	Pass		Pyrus communis subsp. caucasica	P. communis ssp. caucasica - Stavropol	Russian Federation	Communis	2x	1	Seedling selection from seedlot collected in Russia
PI 617510	a550887-4349125-010319-491_P07	CPYR_921.001		Fail	QC CR	Pyrus betulifolia	P. betulifolia	United States	Group 3	2x	1
PI 638000	a550887-4349125-010319-491_P08	CPYR_2797.003	12.2416	Pass		Pyrus salicifolia	P. salicifolia ARM-02-067 - Armenia, Arpa Gorge	Armenia	Group 2	2x	1	Collected from the wild in Armenia.
PI 541603	a550887-4349125-010319-491_P09	CPYR_1296.001		Fail	QC CR	Pyrus dimorphophylla	P. dimorphophylla	Japan	Group 3	2x	1
PI 541736	a550887-4349125-010319-491_P11	CPYR_764.001		Fail	QC CR	Pyrus hybrid	P. dimorphophylla x P. fauriei	United States	Hybrids	2x	1
PI 541768	a550887-4349125-010319-491_P13	CPYR_1239.001	14.1362	Pass		Pyrus hybrid	P. pashia x P. calleryana	Australia	Hybrids	2x	1	P. pashia x P. calleryana
PI 541773	a550887-4349125-010319-491_P15	CPYR_1294.001	25.6491	Pass		Pyrus hybrid	P. pashia x P. calleryana	Australia	Hybrids	2x	1
PI 541846	a550887-4349125-010319-491_P17	CPYR_837.001	5.26043	Pass		Pyrus mamorensis	P. mamorensis - Morocco	Morocco	Group 1	2x	1	Seedling selection from seed collected wild in Morocco
PI 541800	a550887-4349125-010319-491_P19	CPYR_1480.001	34.1942	Pass		Pyrus hybrid	Nelis x P. betulifolia	United States-Oregon	Hybrids	2x	1
PI 541761	a550887-4349125-010319-491_P21	CPYR_1227.001	14.792	Pass		Pyrus hybrid	Chieh Li x Japanese Golden Russet (Decline Susc.)	United States	Hybrids	2x	1	Chieh Li x Jap. Gold. Russet
PI 541614	a550887-4349125-010319-491_P23	CPYR_769.001	11.0772	Pass		Pyrus elaeagrifolia	P. elaeagrifolia Olez 2 - Turkey	Turkey	Group 2	2x	1	Seedling selection from seed collected wild in Turkey
PI 641301	a550887-4362661-080519-771_A01	CPYR_2845.001	14.2651	Pass		Pyrus communis subsp. caucasica	P. communis ssp. caucasica GE-2004-136 - Georgia, Kharagauli	Georgia	Communis	2x	2	Collected in the wild in Republic of Georgia.
PI 654937	a550887-4362661-080519-771_A02	CPYR_2718.001	14.4655	Pass		Pyrus pashia hybrid	Nepal 5049	Nepal	Hybrids	2x	2
PI 309922	a550887-4362661-080519-771_A03	CPYR_660.001	13.7396	Pass		Pyrus regelii	P. regelii (hybrid)	Poland	Group 2	2x	2
PI 420809	a550887-4362661-080519-771_A04	CPYR_661.001	34.1129	Pass		Pyrus calleryana	P. calleryana	Asia	Group 3	2x	2	Collected from the wild in Asia Donated by Vavilov Institute of Plant Industry, Leningrad
PI 617626	a550887-4362661-080519-771_A05	CPYR_2554.004	3.08703	Pass		Pyrus regelii	P. regelii KAZ 95-18-16 - Kazakhstan	Kazakhstan	Group 2	2x	2
PI 541026	a550887-4362661-080519-771_A06	CPYR_668.001	5.40056	Pass		Pyrus calleryana	P. calleryana	United States	Group 3	2x	2
PI 541945	a550887-4362661-080519-771_A07	CPYR_890.001	3.02398	Pass		Pyrus regelii	P. regelii	Russian Federation	Group 2	2x	2	Probably seedling selection from OP seed from botanical col.
PI 541825	a550887-4362661-080519-771_A08	CPYR_808.001	13.5953	Pass		Pyrus koehnei	P. koehnei	United States	Group 3	2x	2	Seedling selection from seed collected in California
PI 665770	a550887-4362661-080519-771_A09	CPYR_2975.002	14.5608	Pass		Pyrus spinosa	P. spinosa ALB-2011-089a	Albania	Group 2	2x	2
PI 541053	a550887-4362661-080519-771_A10	CPYR_1264.003	7.63141	Pass		Pyrus calleryana	P. calleryana OSU-2	United States	Group 3	2x	2	Seedling selection from seed collected in China
PI 541976	a550887-4362661-080519-771_A11	CPYR_912.001	7.82198	Pass		Pyrus syriaca	P. syriaca Mayron B - Israel	Israel	Group 2	2x	2	Seedling selection from seed collected in Israel
PI 541607	a550887-4362661-080519-771_A12	CPYR_1399.001	4.3538	Pass		Pyrus dimorphophylla	P. dimorphophylla 407 seedling B	Japan	Group 3	2x	2	Seedling selection B from seed collected in Japan
PI 541647	a550887-4362661-080519-771_A13	CPYR_1284.001		Fail	QC CR	Pyrus fauriei	P. fauriei No. 4 - Korea	Korea-South	Group 3	2x	2
PI 541061	a550887-4362661-080519-771_A14	CPYR_1272.001	7.55994	Pass		Pyrus calleryana	P. calleryana	United States	Group 3	2x	2
PI 541636	a550887-4362661-080519-771_A15	CPYR_2.006	6.62528	Pass		Pyrus fauriei	P. fauriei - Korea OP seedling	Korea-South	Group 3	2x	2	Collected from the wild in in Korea
PI 540986	a550887-4362661-080519-771_A16	CPYR_1498.001	6.74579	Pass		Pyrus betulifolia	P. betulifolia 3 No. 6	United States	Group 3	2x	2
PI 541113	a550887-4362661-080519-771_A17	CPYR_1022.002	14.209	Pass		Pyrus calleryana f. graciliflora	P. calleryana f. graciliflora Morton Arboretum O.P.	United States	Group 3	2x	2	Open pollinated from botanical collection
PI 654912	a550887-4362661-080519-771_A18	CPYR_2434.002		Fail	QC CR	Pyrus sp.	Siljka	Yugoslavia	Hybrids	2x	2
PI 541098	a550887-4362661-080519-771_A19	CPYR_2095.001	7.41841	Pass		Pyrus calleryana	OPR-220 P. calleryana	United States-Oregon	Group 3	2x	2
PI 541186	a550887-4362661-080519-771_A20	CPYR_218.003	26.5712	Pass		Pyrus communis	Eva Baltet	NA	Communis	2x	2	Bartlett x Flemish Beauty (Fondante des Bois)
PI 325928	a550887-4362661-080519-771_A21	CPYR_940.001	4.83864	Pass		Pyrus dimorphophylla	P. dimorphophylla Vo 27 - Japan	Japan	Group 3	2x	2	Collected from the wild in Japan
PI 665775	a550887-4362661-080519-771_A22	CPYR_2755.001	30.754	Pass		Pyrus communis	Romania 14/109 F2- F-2	Romania	Communis	2x	2
PI 325929	a550887-4362661-080519-771_A23	CPYR_941.001	5.5561	Pass		Pyrus dimorphophylla	P. dimorphophylla Vo 28 - Japan	Japan	Group 3	2x	2	Collected from the wild in Japan
PI 541605	a550887-4362661-080519-771_A24	CPYR_1392.001		Fail	QC CR	Pyrus dimorphophylla	P. dimorphophylla 408 seedling B	Japan	Group 3	2x	2
PI 617668	a550887-4362661-080519-771_B22	CPYR_2613.001	35.2914	Pass		Pyrus hybrid	Emancipation	United States-Texas	Hybrids	2x	2	Probably a chance seedling
PI 688146	a550887-4362661-080519-771_B24	CPYR_2781.001	37.7254	Pass		Pyrus hybrid	India IC 20821	India	Hybrids	2x	2
PI 325932	a550887-4362661-080519-771_C01	CPYR_943.001	5.72846	Pass		Pyrus dimorphophylla	P. dimorphophylla Vo 32 - Japan	Japan	Group 3	2x	2	Collected from the wild in Japan
PI 541606	a550887-4362661-080519-771_C03	CPYR_1393.001	5.09368	Pass		Pyrus dimorphophylla	P. dimorphophylla 408 seedling C	Japan	Group 3	2x	2
PI 665801	a550887-4362661-080519-771_C04	CPYR_2740.001	21.6148	Pass		Pyrus communis	N 217-27.12 (rootstock selection)	Russia	Communis	2x	2
PI 541025	a550887-4362661-080519-771_C05	CPYR_667.001	7.96491	Pass		Pyrus calleryana	OPR-268 P. calleryana	United States-Oregon	Group 3	2x	2
PI 541058	a550887-4362661-080519-771_C06	CPYR_1269.002	7.78835	Pass		Pyrus calleryana	P. calleryana OSU-8	United States	Group 3	2x	2	Seedling selection from seed collected in China
PI 541051	a550887-4362661-080519-771_C07	CPYR_1253.001	8.00275	Pass		Pyrus calleryana	P. calleryana	United States	Group 3	2x	2	Seedling selection
PI 541068	a550887-4362661-080519-771_C08	CPYR_1432.001	7.00643	Pass		Pyrus calleryana	OPR-193 P. calleryana	United States-Oregon	Group 3	2x	2	Seedling selection
PI 541075	a550887-4362661-080519-771_C09	CPYR_1439.001	7.82198	Pass		Pyrus calleryana	Autumn Blaze (P. calleryana)	United States	Group 3	2x	2	Seedling selection from seed collected in China by Reimer
PI 541079	a550887-4362661-080519-771_C10	CPYR_1497.001	8.32364	Pass		Pyrus calleryana	OPR-132 P. calleryana	United States-Oregon	Group 3	2x	2	Seedling selection
PI 541602	a550887-4362661-080519-771_C11	CPYR_1223.001	6.51878	Pass		Pyrus dimorphophylla	P. dimorphophylla 407-1	Japan	Group 3	2x	2	Seedling selection from seed collected wild in Japan
PI 540974	a550887-4362661-080519-771_C12	CPYR_1307.002	6.90414	Pass		Pyrus betulifolia	P. betulifolia	United States	Group 3	2x	2	Seedling selection from seed collected from North China
PI 542012	a550887-4362661-080519-771_C13	CPYR_3.003	9.40403	Pass		Pyrus ussuriensis	P. ussuriensis K-8 (hybrid) - Korea	Korea-South	Group 4	2x	2	Open pollinated from botanical collection
PI 541222	a550887-4362661-080519-771_C14	CPYR_362.001	25.1209	Pass		Pyrus communis	Lowry No. 1	United States	Communis	2x	2
PI 541927	a550887-4362661-080519-771_C15	CPYR_1018.001	10.2238	Pass		Pyrus pyrifolia	P. pyrifolia from A. Donovan house	United States	Group 4	2x	2	Open pollinated from yard planting
PI 506368	a550887-4362661-080519-771_C16	CPYR_1577.001	13.2253	Pass		Pyrus hondoensis	Iwate No. 1	Japan	Group 4	2x	2
PI 542021	a550887-4362661-080519-771_C17	CPYR_1573.002		Fail	QC CR	Pyrus ussuriensis	P. ussuriensis 174 - Korea	Korea-South	Group 4	2x	2
PI 617519	a550887-4362661-080519-771_C18	CPYR_1420.001	37.4704	Pass		Pyrus hybrid	OPR-005 OHxF C-44	United States	Hybrids	2x	2	Bartlett x (Old Home x Farmingdale)
PI 300693	a550887-4362661-080519-771_C19	Bartlett_SG	30.4626	Pass		Pyrus communis	Bartlett	United Kingdom	Communis	2x	2
PI 617513	a550887-4362661-080519-771_C20	CPYR_1218.001	7.01764	Pass		Pyrus calleryana	P. calleryana PC-5 (non-typical)	United States	Group 3	2x	2	Seedling selection
PI 654939	a550887-4362661-080519-771_C21	CPYR_2722.001	37.9076	Pass		Pyrus pyrifolia hybrid	Khan Tangoo I (great pear)	Pakistan	Hybrids	2x	2
PI 541643	a550887-4362661-080519-771_C22	CPYR_1243.001	9.19524	Pass		Pyrus fauriei	P. fauriei MA x P. fauriei W-6	United States	Group 3	2x	2	Seedling selection of P. fauriei MA x W-6 No. 5
PI 541514	a550887-4362661-080519-771_C24	CPYR_2122.005	28.4825	Pass		Pyrus communis	Duchesse Bererd	France	Communis	2x	2	seedling of 'Duchesse Bronzee'
PI 688137	a550887-4362661-080519-771_D22	CPYR_2955.001	37.3485	Pass		Pyrus communis	Horner 4	United States-Oregon	Communis	2x	2	O.P. seedling from parent population including OHxF 40, 51,
PI 542018	a550887-4362661-080519-771_D24	CPYR_1299.001	5.70884	Pass		Pyrus ussuriensis	P. ussuriensis W-6	China	Group 4	2x	2	Probably a seedling selection
PI 440629	a550887-4362661-080519-771_E01	CPYR_721.001	13.7803	Pass		Pyrus communis subsp. caucasica	P. communis ssp. caucasica - Stavropol	Russian Federation	Communis	2x	2	Seedling selection from seedlot collected in Russia
PI 654928	a550887-4362661-080519-771_E03	CPYR_2666.002	35.5745	Pass		Pyrus hybrid	Nashpati II	Pakistan	Hybrids	2x	2
PI 541183	a550887-4362661-080519-771_E04	CPYR_202.003	22.3001	Pass		Pyrus communis	Early Harvest (=Chambers)	United States-Maryland	Communis	2x	2	Chance seedling
PI 420995	a550887-4362661-080519-771_E05	CPYR_664.001	9.59881	Pass		Pyrus calleryana	Whitehouse (P. calleryana)	United States	Group 3	2x	2	OP seedling selection of cultivar 'Bradford'
PI 541106	a550887-4362661-080519-771_E07	CPYR_2187.001	8.41192	Pass		Pyrus calleryana	C.P. 6-48	United States	Group 3	2x	2	Seedling selection
PI 541533	a550887-4362661-080519-771_E08	CPYR_2141.002	23.2684	Pass		Pyrus communis	Anderson (Andy)	United States	Communis	2x	2	Bartlett x Rose of July (Rosee de Juillet)
PI 541107	a550887-4362661-080519-771_E09	CPYR_2188.001	8.13727	Pass		Pyrus calleryana	Grant St. Yellow (P. calleryana)	United States-Oregon	Group 3	2x	2	P. calleryana sdlg.selected on Grant St. by M.N. Westwood
PI 277529	a550887-4362661-080519-771_E10	CPYR_512.004	25.3184	Pass		Pyrus communis	Sanguinole	Germany	Communis	2x	2
PI 617533	a550887-4362661-080519-771_E12	CPYR_2330.001	8.51982	Pass		Pyrus calleryana	Cleveland Select (P. calleryana)	United States-Ohio	Group 3	2x	2
PI 541577	a550887-4362661-080519-771_E13	CPYR_747.001	25.4908	Pass		Pyrus cordata	P. cordata (hybrid) - France	France	Group 1	2x	2	Seedling selection from seedlot collected wild in France
PI 542015	a550887-4362661-080519-771_E14	CPYR_1260.001	6.91535	Pass		Pyrus ussuriensis	P. ussuriensis MA 1919-23	United States	Group 4	2x	2
PI 352661	a550887-4362661-080519-771_E15	CPYR_626.001	21.3178	Pass		Pyrus communis	Zaharoasa de Vara	Romania	Communis	2x	2
PI 541012	a550887-4362661-080519-771_E16	CPYR_1170.002	7.77294	Pass		Pyrus calleryana	OPR-157 P. calleryana	United States	Group 3	2x	2
PI 541065	a550887-4362661-080519-771_E17	CPYR_1304.001	7.54312	Pass		Pyrus calleryana	P. calleryana	United States	Group 3	2x	2
PI 541829	a550887-4362661-080519-771_E18	CPYR_815.001	10.6218	Pass		Pyrus koehnei	P. koehnei	California	Group 3	2x	2	Seedling selection from seedlot collected in California
PI 541651	a550887-4362661-080519-771_E19	CPYR_1472.001	8.66696	Pass		Pyrus fauriei	P. fauriei	Korea-South	Group 3	2x	2	Seedling selection B from seed from Korea
PI 541632	a550887-4362661-080519-771_E20	CPYR_772.004	7.06248	Pass		Pyrus fauriei	P. fauriei	Korea-South	Group 3	2x	2	Seedling selection from seedlot collected in Korea
PI 617516	a550887-4362661-080519-771_E21	CPYR_1281.001	9.81041	Pass		Pyrus fauriei	P. fauriei - Korea (Morton Arboretum)	Korea-South	Group 3	2x	2	Uncertain, possibly collected wild
PI 540941	a550887-4362661-080519-771_E22	CPYR_1612.001	11.7246	Pass		Pyrus spinosa	P. spinosa (amygdaliformis) - Turkey	Turkey	Group 2	2x	2	Seedling selection from seedlot WB-7 collected in Turkey
PI 541735	a550887-4362661-080519-771_E23	CPYR_763.001	10.1972	Pass		Pyrus hybrid	P. dimorphophylla x P. fauriei W-6	United States	Hybrids	2x	2	P. dimorphylla x P. fauriei
PI 540982	a550887-4362661-080519-771_F22	CPYR_1379.001	6.60566	Pass		Pyrus betulifolia	OPR-260 P. betulifolia	United States	Group 3	2x	2	P. betulifolia No. 3 seedling selection
PI 541652	a550887-4362661-080519-771_F24	CPYR_1496.001	9.95754	Pass		Pyrus fauriei	P. fauriei Rootstock Selection 12-14	Korea-South	Group 3	2x	2	Seedling selection from Korean seedlot
PI 540980	a550887-4362661-080519-771_G01	CPYR_1356.001	6.8593	Pass		Pyrus betulifolia	P. betulifolia-2 x P. betulifolia-1	United States	Group 3	2x	2	P. betulifolia-2 x P. betulifolia-1 seedling selection A
PI 541062	a550887-4362661-080519-771_G03	CPYR_1301.001	8.25358	Pass		Pyrus calleryana	P. calleryana SN	United States	Group 3	2x	2	Seedling selection
PI 541010	a550887-4362661-080519-771_G05	CPYR_669.001	6.08579	Pass		Pyrus calleryana	P. calleryana	United States	Group 3	2x	2
PI 541644	a550887-4362661-080519-771_G07	CPYR_1280.003	6.51738	Pass		Pyrus fauriei	P. fauriei	Korea-South	Group 3	2x	2
PI 541574	a550887-4362661-080519-771_G09	CPYR_742.001	10.3751	Pass		Pyrus cordata	P. cordata - Turkey	Turkey	Group 1	2x	2	Seedling selection from seedlot collected in Turkey
PI 541441	a550887-4362661-080519-771_G13	CPYR_700.001	23.4085	Pass		Pyrus communis	Domestic Pear "French Type"	NA	Communis	2x	2	Prosser received from source in Washington as 'French type seedling'
PI 617510	a550887-4362661-080519-771_G15	CPYR_921.001	13.1314	Pass		Pyrus betulifolia	P. betulifolia	United States	Group 3	2x	2	Seedling selection from seedlot collected in Asia
PI 300693	a550887-4362661-080519-771_G17	CPYR_38.001	30.5537	Pass		Pyrus communis	Bartlett	United Kingdom	Communis	2x	2	Chance seedling
PI 691242	a550887-4362661-080519-771_G19	CPYR_2880.001	24.1007	Pass		Pyrus pyrifolia	Utrennaya Svezheste	Russian Federation	Group 4	2x	2
PI 617546	a550887-4362661-080519-771_G21	CPYR_2357.001	23.763	Pass		Pyrus communis	Republica	Romania	Communis	2x	2
PI 541609	a550887-4362661-080519-771_G23	CPYR_1457.001	5.84336	Pass		Pyrus dimorphophylla	P. dimorphophylla 407	Japan	Group 3	2x	2	Seedling selection B from seed collected in Japan
PI 541633	a550887-4362661-080519-771_G24	CPYR_779.001	5.62056	Pass		Pyrus fauriei	P. fauriei No. 4	Korea-South	Group 3	2x	2	Seedling selection from seedlot collected in Korea
PI 542009	a550887-4362661-080519-771_H22	CPYR_924.001	15.8373	Pass		Pyrus ussuriensis	P. ussuriensis - China	China	Group 4	2x	2	Seedling selection from seedlot collected in China
PI 541389	a550887-4362661-080519-771_I01	CPYR_1221.001	26.0962	Pass		Pyrus communis	P. communis	United States	Communis	2x	2	Seedling selection
PI 540949	a550887-4362661-080519-771_I03	CPYR_652.001	6.88172	Pass		Pyrus betulifolia	P. betulifolia 3	United States	Group 3	2x	2
PI 541521	a550887-4362661-080519-771_I04	CPYR_2129.002	24.6472	Pass		Pyrus communis	Pierre Corneille	France	Communis	2x	2	Buerre Diel x Doyenne du Comice
PI 541732	a550887-4362661-080519-771_I05	CPYR_760.001	14.3492	Pass		Pyrus hybrid	P. dimorphophylla x P. calleryana	United States	Hybrids	2x	2	P. dimorphylla x P. calleryana
PI 541646	a550887-4362661-080519-771_I06	CPYR_1283.001	6.60006	Pass		Pyrus fauriei	P. fauriei	Korea-South	Group 3	2x	2	Seedling selection A of open pollinated seed from Korea
PI 541975	a550887-4362661-080519-771_I07	CPYR_909.001	7.76453	Pass		Pyrus syriaca	P. syriaca No. 1 - Israel	Israel	Group 2	2x	2	Seedling selection from seed collected wild in Israel
PI 540944	a550887-4362661-080519-771_I11	CPYR_654.001	6.42069	Pass		Pyrus betulifolia	OPR-111 P. betulifolia No. 2	United States	Group 3	2x	2	Seedling selection from seed collected in China by Reimer
PI 300693	a550887-4362661-080519-771_I12	CPYR_38.001	30.5158	Pass		Pyrus communis	Bartlett	United Kingdom	Communis	2x	2	Chance seedling
PI 541072	a550887-4362661-080519-771_I14	CPYR_1436.001	8.13307	Pass		Pyrus calleryana	OPR-177 P. calleryana	United States	Group 3	2x	2
PI 541291	a550887-4362661-080519-771_I15	CPYR_693.001	18.7548	Pass		Pyrus communis subsp. pyraster	P. communis ssp. pyraster Olez 5 - Turkey	Turkey	Communis	2x	2	Seedling selection from seed collected in Turkey
PI 541013	a550887-4362661-080519-771_I17	CPYR_662.001	8.0658	Pass		Pyrus calleryana	Capital (P. calleryana)	United States	Group 3	2x	2	OP seedling selection of cultivar Bradford
PI 541017	a550887-4362661-080519-771_I18	CPYR_671.001	10.1159	Pass		Pyrus calleryana	P. calleryana No. 11	United States	Group 3	2x	2	Seedling selection from seed rec'd from Southern Nursery
PI 541002	a550887-4362661-080519-771_I19	CPYR_2099.001	6.74719	Pass		Pyrus betulifolia	P. betulifolia	United States	Group 3	2x	2	Seedling selection #1 from P. betulifolia-3 from China
PI 541108	a550887-4362661-080519-771_I20	CPYR_2189.001	8.22555	Pass		Pyrus calleryana	Aristocrat (P. calleryana)	China	Group 3	2x	2	Seedling selection from seedlot F. Meyer collected in China
PI 688125	a550887-4362661-080519-771_I22	CPYR_2704.002	28.1869	Pass		Pyrus communis	QR 708-12 (P. communis rootstock clone)	United Kingdom	Communis	2x	2	Pyrus communis 'BP-1' x 'Old Home'
PI 617520	a550887-4362661-080519-771_I23	CPYR_1427.001	8.75384	Pass		Pyrus calleryana	OPR-168 P. calleryana	United States	Group 3	2x	2	Seedling selection
PI 691238	a550887-4362661-080519-771_I24	CPYR_2878.001	11.9053	Pass		Pyrus pyrifolia	India NIC 20813	India	Group 4	2x	2
PI 688128	a550887-4362661-080519-771_J22	CPYR_2985.001	32.4552	Pass		Pyrus sp.	India IC 22040	India	Hybrids	2x	2
PI 655572	a550887-4362661-080519-771_J24	CPYR_2673.002	19.157	Pass		Pyrus pashia hybrid	Tangay (P. pashia hybrid) - Pakistan	Pakistan	Hybrids	2x	2
PI 541826	a550887-4362661-080519-771_K01	CPYR_809.001	11.1907	Pass		Pyrus koehnei	P. koehnei	United States	Group 3	2x	2	Seedling selection from seed collected in California
PI 540975	a550887-4362661-080519-771_K02	CPYR_1308.002	6.75981	Pass		Pyrus betulifolia	P. betulifolia	United States	Group 3	2x	2	Seedling selection from seed collected from North China
PI 325927	a550887-4362661-080519-771_K03	CPYR_1456.001	5.23801	Pass		Pyrus dimorphophylla	P. dimorphophylla Vo-26	Japan	Group 3	2x	2
PI 506384	a550887-4362661-080519-771_K04	CPYR_1676.003	31.0511	Pass		Pyrus hybrid	Coadesele IDX (prob. is Ayers)	Romania	Hybrids	2x	2
PI 325930	a550887-4362661-080519-771_K05	CPYR_1190.001	5.07966	Pass		Pyrus dimorphophylla	P. dimorphophylla Vo-29	Japan	Group 3	2x	2	Seedling selection from wild Japanese seedlot CPYR 942
PI 617601	a550887-4362661-080519-771_K06	CPYR_2525.001	32.3627	Pass		Pyrus hybrid	Tennessee	United States	Hybrids	2x	2
PI 541074	a550887-4362661-080519-771_K07	CPYR_1438.001	8.12186	Pass		Pyrus calleryana	OPR-191 P. calleryana	United States	Group 3	2x	2	Seedling selection
PI 541909	a550887-4362661-080519-771_K08	CPYR_1186.001	33.9644	Pass		Pyrus ussuriensis	Chin Li	China	Group 4	2x	2
PI 541795	a550887-4362661-080519-771_K09	CPYR_1453.001	6.59165	Pass		Pyrus hybrid	P. hybrid	United States	Hybrids	2x	2	Seedling selection
PI 541435	a550887-4362661-080519-771_K10	CPYR_1465.001	18.567	Pass		Pyrus communis subsp. pyraster	P. communis ssp. pyraster Olez 5 - Turkey	Turkey	Communis	2x	2
PI 318871	a550887-4362661-080519-771_K11	CPYR_295.001	5.94706	Pass		Pyrus dimorphophylla	P. dimorphophylla - Inunashi - Japan	Japan	Group 3	2x	2
PI 541603	a550887-4362661-080519-771_K12	CPYR_1296.001	5.09087	Pass		Pyrus dimorphophylla	P. dimorphophylla 408	Japan	Group 3	2x	2	Probably a seedling selection from seed collected in Japan
PI 541610	a550887-4362661-080519-771_K14	CPYR_757.001	4.34399	Pass		Pyrus dimorphophylla	P. dimorphophylla 408	Japan	Group 3	2x	2	Seedling selection from seed collected in Japan
PI 541665	a550887-4362661-080519-771_K15	CPYR_792.001	5.06145	Pass		Pyrus gharbiana	P. gharbiana	Morocco	Group 1	2x	2	Seedling selection from seed collected wild in Morocco
PI 541018	a550887-4362661-080519-771_K16	CPYR_673.001	6.57343	Pass		Pyrus calleryana	P. calleryana PC-5	NA	Group 3	2x	2
PI 617561	a550887-4362661-080519-771_K17	CPYR_2384.002	35.6543	Pass		Pyrus hybrid	Pineapple	NA	Hybrids	2x	2	Unknown seedling may have been brought from China in the 1850s. Named Pineapple by Georgia Exp. Station.
PI 688189	a550887-4362661-080519-771_K18	CPYR_2834.002	25.7767	Pass		Pyrus communis	Quince-Pear	Georgia	Communis	2x	2	Selected from cultivation in the Republic of Georgia.
PI 541827	a550887-4362661-080519-771_K19	CPYR_812.001	11.0449	Pass		Pyrus koehnei	P. koehnei	United States	Group 3	2x	2	Seedling selection from seedlot collected in California
PI 541073	a550887-4362661-080519-771_K20	CPYR_1437.001	8.26899	Pass		Pyrus calleryana	P. calleryana [C-44?]	United States	Group 3	2x	2	Seedling selection from Asian seedlot
PI 541792	a550887-4362661-080519-771_K21	CPYR_1449.001	5.56171	Pass		Pyrus hybrid	P. hybrid (calleryana)	United States	Hybrids	2x	2	Seedling selection
PI 540930	a550887-4362661-080519-771_K22	CPYR_635.001	12.5906	Pass		Pyrus spinosa	P. spinosa (amygdaliformis) - Turkey	Turkey	Group 2	2x	2	Seedling selection from seedlot collected wild in Turkey
PI 541793	a550887-4362661-080519-771_K23	CPYR_1450.001	5.29686	Pass		Pyrus hybrid	P. hybrid from Millikan	United States-Missouri	Hybrids	2x	2	Seedling selection
PI 541796	a550887-4362661-080519-771_K24	CPYR_1455.001	7.06529	Pass		Pyrus hybrid	P. hybrid	United States	Hybrids	2x	2	Seedling selection
PI 300693	a550887-4362661-080519-771_L21	CPYR_38.001	30.5466	Pass		Pyrus communis	Bartlett	United Kingdom	Communis	2x	2	Chance seedling
PI 617565	a550887-4362661-080519-771_L22	CPYR_2395.001	37.9202	Pass		Pyrus communis hybrid	Hermit	United States	Hybrids	2x	2
PI 617652	a550887-4362661-080519-771_L23	CPYR_2593.001	24.9009	Pass		Pyrus communis	Untoasa de Geoagiu	Romania	Communis	2x	2
-	a550887-4362661-080519-771_L24	CPYR_2975.004	11.4065	Pass		Pyrus spinosa	P. spinosa ALB-2011-089b	Albania	Group 2	2x	2
PI 255607	a550887-4362661-080519-771_M01	CPYR_72.004	23.6635	Pass		Pyrus communis	Beurré Dubuisson	Belgium	Communis	2x	2
PI 540978	a550887-4362661-080519-771_M02	CPYR_1311.001	6.81446	Pass		Pyrus betulifolia	P. betulifolia	United States	Group 3	2x	2	Seedling selection from seed collected from North China
PI 282974	a550887-4362661-080519-771_M05	CPYR_365.005	25.8635	Pass		Pyrus communis	Lukavanski	Czech Republic	Communis	2x	2
PI 483384	a550887-4362661-080519-771_M06	CPYR_1538.001	19.2018	Pass		Pyrus communis subsp. pyraster	P. communis ssp. pyraster - Poland	Poland	Communis	2x	2	Chance seedling
PI 541011	a550887-4362661-080519-771_M07	CPYR_670.001	8.2802	Pass		Pyrus calleryana	P. calleryana	United States	Group 3	2x	2	Probably a seedling selection from an Asian seedlot
PI 279940	a550887-4362661-080519-771_M09	CPYR_507.002	22.3043	Pass		Pyrus communis	RX 274	France	Communis	2x	2	Seedling selection of cultivar Clairgeau
PI 617591	a550887-4362661-080519-771_M10	CPYR_2515.001	30.5368	Pass		Pyrus sp.	Helmer	United States-Idaho	Hybrids	2x	2	Clone from a pear growing wild in northern Idaho
PI 541728	a550887-4362661-080519-771_M11	CPYR_415.001	36.4951	Pass		Pyrus hybrid	Nijisseiki x Old Home (Decline susceptible)	United States	Hybrids	2x	2	Nijisseiki x Old home decline susceptible
PI 541410	a550887-4362661-080519-771_M13	CPYR_1338.001	26.4591	Pass		Pyrus communis	OHxF 5	United States-Oregon	Communis	2x	2
PI 541101	a550887-4362661-080519-771_M14	CPYR_2098.001	25.1811	Pass		Pyrus calleryana	OPR-211 P. calleryana (?)	United States-Oregon	Group 3	2x	2
PI 312505	a550887-4362661-080519-771_M15	CPYR_452.002	24.9233	Pass		Pyrus communis	Phileson	Canada-Ontario	Communis	2x	2	Kurskaya x Flemish Beauty
PI 617617	a550887-4362661-080519-771_M16	CPYR_2543.001	32.1203	Pass		Pyrus communis	Arbi	Tunisia	Communis	2x	2	Local Tunisian cultivar
PI 542003	a550887-4362661-080519-771_M17	CPYR_926.001	5.79572	Pass		Pyrus ussuriensis	P. ussuriensis No. 6 - Korea	Korea-South	Group 4	2x	2	Seedling selection from seed collected in Korea
PI 665803	a550887-4362661-080519-771_M18	CPYR_2773.001	39.2108	Pass		Pyrus (betulifolia?) hybrid	Vanovskaya 84-2 - Turkmenistan	Turkmenistan	Hybrids	2x	2
PI 541634	a550887-4362661-080519-771_M19	CPYR_777.001	6.34502	Pass		Pyrus fauriei	P. fauriei No. 5	Korea-South	Group 3	2x	2	Seedling selection from seed collected in Korea
PI 688088	a550887-4362661-080519-771_M20	CPYR_2663.002	12.4406	Pass		Pyrus pyrifolia hybrid	Batang I (big pear)	Pakistan	Hybrids	2x	2
PI 312144	a550887-4362661-080519-771_M21	CPYR_859.001	23.9157	Pass		Pyrus nivalis	P. nivalis	Netherlands	Group 1	2x	2	Uncertain, possibly collected from the wild
PI 541063	a550887-4362661-080519-771_M22	CPYR_1302.001	7.22083	Pass		Pyrus calleryana	P. calleryana	United States	Group 3	2x	2
PI 654942	a550887-4362661-080519-771_M23	CPYR_2753.002	25.8944	Pass		Pyrus hybrid	SIM 117-11 (Alberta, Canada)	Canada	Hybrids	2x	2
PI 665794	a550887-4362661-080519-771_M24	CPYR_2662.002	37.745	Pass		Pyrus pashia hybrid	Kharnak I (donkey pear)	Pakistan	Hybrids	2x	2
PI 40019	a550887-4362661-080519-771_N01	CPYR_314.001	7.82899	Pass		Pyrus sp.	Kansu Pear	China	Hybrids	2x	2	Seedling selection from seedlot collected wild in China
PI 691229	a550887-4362661-080519-771_N03	CPYR_2870.001	12.0987	Pass		Pyrus sp.	VIII-65 Nepal	Nepal	Hybrids	2x	2
PI 541057	a550887-4362661-080519-771_N05	CPYR_1268.002	7.72669	Pass		Pyrus calleryana	P. calleryana OSU-7	United States	Group 3	2x	2	Seedling selection from seed collected in China
PI 541179	a550887-4362661-080519-771_N07	CPYR_193.004	28.7726	Pass		Pyrus communis	Duchesse Bronzee	France	Communis	2x	2	Duchesse d'Angouleme sport
PI 541125	a550887-4362661-080519-771_N09	CPYR_43.004	24.6528	Pass		Pyrus communis	Belle de Beugny	France	Communis	2x	2
PI 541834	a550887-4362661-080519-771_N11	CPYR_823.001		Fail	QC CR	Pyrus koehnei	P. koehnei	United States	Group 3	2x	2
PI 617515	a550887-4362661-080519-771_N13	CPYR_1220.001	6.82707	Pass		Pyrus calleryana	P. calleryana PC-7 (hybrid)	United States	Group 3	2x	2
PI 541085	a550887-4362661-080519-771_N17	CPYR_1171.003	9.61563	Pass		Pyrus calleryana	OPR-135 P. calleryana	United States	Group 3	2x	2	Seedling selection
PI 541714	a550887-4362661-080519-771_N21	CPYR_1166.001	37.965	Pass		Pyrus hybrid	Kieffer	United States-Pennsylvania	Hybrids	2x	2	P. pyrifolia x Bartlett
PI 693207	a550887-4362661-080519-771_N22	CPYR_2627.002	25.2007	Pass		Pyrus communis	Timpurii de Dimbovita	Romania	Communis	2x	2
PI 693206	a550887-4362661-080519-771_O02	CPYR_2984.001	3.73723	Pass		Pyrus communis	India NIC 19390	India	Communis	2x	2
PI 255610	a550887-4362661-080519-771_O04	CPYR_189.003	23.0526	Pass		Pyrus communis	Doyenne Flon Aine	France	Communis	2x	2	Chance seedling
PI 541637	a550887-4362661-080519-771_O05	CPYR_780.001	6.80885	Pass		Pyrus fauriei	P. fauriei No. 4	Korea-South	Group 3	2x	2	Seedling selection from OP seed collected wild in Korea
PI 541645	a550887-4362661-080519-771_O06	CPYR_1282.001	5.48183	Pass		Pyrus fauriei	P. fauriei x self	United States	Group 3	2x	2	Self cross of seed collected in Korea (CPYR 1280)
PI 541635	a550887-4362661-080519-771_O07	CPYR_778.001	5.60094	Pass		Pyrus fauriei	P. fauriei OSU 69	Korea-South	Group 3	2x	2	Seedling selection from seedlot collected in Korea
PI 541734	a550887-4362661-080519-771_O08	CPYR_762.001	10.2168	Pass		Pyrus hybrid	P. dimorphophylla x P. fauriei	United States	Hybrids	2x	2	P. dimorphylla x P. fauriei
PI 541050	a550887-4362661-080519-771_O09	CPYR_1245.001	8.18351	Pass		Pyrus calleryana	P. calleryana	United States	Group 3	2x	2	Seedling selection
PI 541642	a550887-4362661-080519-771_O10	CPYR_1242.001	9.589	Pass		Pyrus fauriei	P. fauriei MA x P. fauriei W-6	United States-Oregon	Group 3	2x	2	Seedling selection of P. fauriei MA x W-6 No. 4
PI 541729	a550887-4362661-080519-771_O11	CPYR_650.001	13.741	Pass		Pyrus hybrid	P. calleryana x P. fauriei	United States	Hybrids	2x	2
PI 541052	a550887-4362661-080519-771_O12	CPYR_1254.001	8.6081	Pass		Pyrus calleryana	P. calleryana	United States	Group 3	2x	2	Seedling selection
PI 688202	a550887-4362661-080519-771_O13	CPYR_2992.001	24.4524	Pass		Pyrus communis	Kings Valley Pear 1	United States-Oregon	Communis	2x	2
PI 693212	a550887-4362661-080519-771_O14	CPYR_2744.001	25.3885	Pass		Pyrus communis	India NIC 19388	India	Communis	2x	2
PI 541094	a550887-4362661-080519-771_O15	CPYR_2091.001	9.2639	Pass		Pyrus calleryana	OPR-138 P. calleryana	United States-Oregon	Group 3	2x	2	Seedling selection
PI 325927	a550887-4362661-080519-771_O16	CPYR_939.001	5.20578	Pass		Pyrus dimorphophylla	P. dimorphophylla - Japan	Japan	Group 3	2x	2	Seedling selection from wild Japanese seedlot CPYR 939
PI 541092	a550887-4362661-080519-771_O17	CPYR_2089.001	8.00835	Pass		Pyrus calleryana	OPR-187 P. calleryana	United States-Oregon	Group 3	2x	2
PI 541019	a550887-4362661-080519-771_O18	CPYR_675.001	8.65995	Pass		Pyrus calleryana	P. calleryana PC-7	NA	Group 3	2x	2
PI 541055	a550887-4362661-080519-771_O19	CPYR_1266.002	8.09943	Pass		Pyrus calleryana	P. calleryana OSU-5	United States	Group 3	2x	2	Seedling selection from seedlot collected wild in China
Q 39614	a550887-4362661-080519-771_O20	CPYR_2777.001	12.5779	Pass		Pyrus pyrifolia	India NIC 20804	India	Group 4	2x	2
PI 617518	a550887-4362661-080519-771_O21	CPYR_1334.001	6.59726	Pass		Pyrus calleryana	P. calleryana	United States	Group 3	2x	2	Seedling selection from Asian seedlot
PI 637995	a550887-4362661-080519-771_O22	CPYR_2730.001	20.3565	Pass		Pyrus ussuriensis	P. ussuriensis 'Primorski Sour' - Khabarovsk sdlg. 1	Russian Federation	Group 4	2x	2
PI 325930	a550887-4362661-080519-771_O23	CPYR_1389.001	5.65699	Pass		Pyrus dimorphophylla	P. dimorphophylla Vo-29	Japan	Group 3	2x	2	Seedling selection from wild Japanese seedlot CPYR 942
-	a550887-4362661-080519-771_O24	BM2000	21.0221	Pass		Pyrus communis	BM2000	Australia	Communis	2x	2
PI 541059	a550887-4362661-080519-771_P01	CPYR_1270.001	7.99154	Pass		Pyrus calleryana	P. calleryana OSU-9	United States	Group 3	2x	2	Seedling selection from seed collected in China
PI 541797	a550887-4362661-080519-771_P03	CPYR_1474.001	11.8591	Pass		Pyrus hybrid	P. pashia x P. calleryana	Australia	Hybrids	2x	2	P. pashia x P. calleryana
PI 541321	a550887-4362661-080519-771_P07	CPYR_731.001	17.2737	Pass		Pyrus communis subsp. caucasica	P. communis ssp. caucasica - Yankulyski	Russian Federation	Communis	2x	2
PI 540946	a550887-4362661-080519-771_P09	CPYR_656.001	6.41229	Pass		Pyrus betulifolia	OPR-114 P. betulifolia No. 5	United States	Group 3	2x	2	Seedling selection from seed collected in China by Reimer
PI 540947	a550887-4362661-080519-771_P11	CPYR_647.002	9.98417	Pass		Pyrus betulifolia	P. betulifolia	China	Group 3	2x	2	Collected from the wild in China
PI 693199	a550887-4362661-080519-771_P13	CPYR_2667.003	8.75804	Pass		Pyrus pashia	Kharnak III (donkey pear)	Pakistan	Group 4	2x	2
PI 541731	a550887-4362661-080519-771_P15	CPYR_759.001	10.0767	Pass		Pyrus hybrid	P. dimorphophylla x P. calleryana	United States	Hybrids	2x	2	P. dimorphylla x P. calleryana
PI 214185	a550887-4362661-080519-771_P21	CPYR_665.001	7.93548	Pass		Pyrus calleryana	P. calleryana D6	Australia	Group 3	2x	2	Origially collected from the wild in S. China
PI 657920	a550887-4362661-080519-771_P22	CPYR_2846.001	24.4763	Pass		Pyrus communis	Zebra Pear O.P. - Georgia	Georgia	Communis	2x	2	Fruit purchased at market in Gori, Georgia.
PI 691231	a550887-4362661-080519-771_P23	CPYR_2661.002	19.5269	Pass		Pyrus sp.	Bap Tangoo	Pakistan	Hybrids	2x	2
PI 541869	a550887-4362661-080519-771_P24	CPYR_1714.003	19.5367	Pass		Pyrus nivalis	P. nivalis 1219 - Tashkent sdlg. 3	Uzbekistan	Group 1	2x	2	Open-pollinated from botanical collection
* Fail/Pass info for the samples from the Screening Panel was taken from Montanari et al., 2019. Samples from Genotyping 1 and 2 Panels were merged and re-analysed in this study, and considered failed when their QC CR < 96.385
